# Supplementary material for: Discovery of l-threonine transaldolases for enhanced biosynthesis of beta-hydroxylated amino acids
Source: PubMed Central journal article supplement (PMC10495429; doi:10.1038/s42003-023-05293-0), 2023-09-11
Supplement: 42003_2023_5293_MOESM2_ESM.pdf [file 42003_2023_5293_MOESM2_ESM.pdf]

## **Supporting Information**

### **Discovery of L-threonine transaldolases for enhanced biosynthesis of beta-hydroxylated amino acids**

Michaela A. Jones<sup>1</sup>, Neil D. Butler<sup>1</sup>, Shelby R. Anderson<sup>1</sup>, Sean A. Wirt<sup>1</sup>, Ishika Govil<sup>1</sup>, Xinyi Lyu<sup>2</sup>, Yinzhi Fang<sup>2</sup>, and Aditya M. Kunjapur<sup>1\*</sup>

<sup>1</sup>Department of Chemical and Biomolecular Engineering, University of Delaware, Newark, DE 19716, United States

<sup>2</sup>Department of Chemistry and Biochemistry, University of Delaware, Newark, DE 19716, United States

\*Correspondence: [kunjapur@udel.edu](mailto:kunjapur@udel.edu)

|                                                                                                                                |           |
|--------------------------------------------------------------------------------------------------------------------------------|-----------|
| <b><i>I. Supplementary Methods:</i></b> .....                                                                                  | <b>3</b>  |
| <b>In vitro TTA-ADH-PTDH Assay</b> .....                                                                                       | <b>3</b>  |
| <b>Timed quench assay for HPLC analysis</b> .....                                                                              | <b>3</b>  |
| <b>Amino acid substrate Assay</b> .....                                                                                        | <b>3</b>  |
| <b>Synthesis of 2-nitro-<math>\beta</math>-OH-phenylalanine</b> .....                                                          | <b>4</b>  |
| <b>Mass spectrometry confirmation of <math>\beta</math>-OH nsAAs using in vitro TTA-ADH coupled assay</b> .....                | <b>4</b>  |
| <b><i>II. Supplementary Tables</i></b> .....                                                                                   | <b>6</b>  |
| <b>Table S1: Absorbance of investigated aldehydes at 340 nm in phosphate buffer.</b> .....                                     | <b>6</b>  |
| <b>Table S2. Predicted attributes of selected threonine transaldolases screened in this study.</b> .....                       | <b>7</b>  |
| <b>Table S3. Strains and Plasmids used in this study.</b> .....                                                                | <b>8</b>  |
| <b>Table S4. Oligonucleotides used in this study.</b> .....                                                                    | <b>10</b> |
| <b>Table S5. DNA G-Blocks/Twist gene fragments for cloning in this study. Start codons for each gene are underlined.</b> ..... | <b>12</b> |
| <b><i>III. Supplementary Figures</i></b> .....                                                                                 | <b>16</b> |
| <b>Figure S1</b> .....                                                                                                         | <b>16</b> |
| <b>Figure S2</b> .....                                                                                                         | <b>17</b> |
| <b>Figure S3</b> .....                                                                                                         | <b>18</b> |
| <b>Figure S4</b> .....                                                                                                         | <b>19</b> |
| <b>Figure S5</b> .....                                                                                                         | <b>20</b> |
| <b>Figure S6</b> .....                                                                                                         | <b>21</b> |
| <b>Figure S7</b> .....                                                                                                         | <b>22</b> |
| <b>Figure S8</b> .....                                                                                                         | <b>23</b> |
| <b>Figure S9</b> .....                                                                                                         | <b>24</b> |

|                                                 |           |
|-------------------------------------------------|-----------|
| <b>Figure S10.....</b>                          | <b>25</b> |
| <b>Figure S11.....</b>                          | <b>26</b> |
| <b>Figure S12.....</b>                          | <b>27</b> |
| <b>Figure S13.....</b>                          | <b>28</b> |
| <b>Figure S14.....</b>                          | <b>29</b> |
| <b>Figure S15.....</b>                          | <b>30</b> |
| <b>Figure S16.....</b>                          | <b>31</b> |
| <b>Figure S17.....</b>                          | <b>32</b> |
| <b>Figure S18.....</b>                          | <b>33</b> |
| <b>Figure S19.....</b>                          | <b>34</b> |
| <b>Figure S20.....</b>                          | <b>35</b> |
| <b>Figure S21.....</b>                          | <b>36</b> |
| <b>Figure S22.....</b>                          | <b>37</b> |
| <b>Figure S23.....</b>                          | <b>38</b> |
| <b>Figure S24.....</b>                          | <b>39</b> |
| <b>Figure S25.....</b>                          | <b>40</b> |
| <b>Figure S26.....</b>                          | <b>41</b> |
| <b>Figure S27.....</b>                          | <b>42</b> |
| <b>Figure S28.....</b>                          | <b>43</b> |
| <b>Figure S29.....</b>                          | <b>47</b> |
| <b>Figure S30.....</b>                          | <b>48</b> |
| <b>Figure S31.....</b>                          | <b>49</b> |
| <b>Figure S32.....</b>                          | <b>50</b> |
| <b>Figure S33.....</b>                          | <b>51</b> |
| <b><i>IV. Supplementary References.....</i></b> | <b>52</b> |

## I. Supplementary Methods:

### In vitro TTA-ADH-PTDH Assay

To improve product yields, we coupled the TTA with ScADH as well as an engineered phosphite dehydrogenase (PTDH). The assay was performed as described in the main text with 100  $\mu$ L reaction volumes in a 96-well plate for the TTA-ADH coupled assay with 10 mM **3** and the addition of PTDH to a final concentration of 0.1 mg/mL and phosphite to a final concentration of 20 mM. The reaction was left shaking at 1000 RPM with an orbital radius of 1.25 mm at 30 °C overnight. The reactions were quenched after 20 h with a final concentration of 1% TFA. Supernatant was collected following centrifugation and submitted to HPLC as reported in the main text.

### Timed quench assay for HPLC analysis

Confirmation of the rates from the ADH assay were performed using the TTA-ADH coupled in vitro assay using a reaction mixture as reported in the main text in a 96-well plate shaking at 1000 RPM with an orbital radius of 1.25 mm at 30 °C. We chose to quench with 1% TFA at approximately 0, 1, 2, 5, 10, 20, and 40 minutes to measure reaction kinetics. The samples were then collected and submitted to the HPLC for analysis as reported in the main text.

### Amino acid substrate Assay

Reaction mixtures were prepared in a 96-well plate with 100  $\mu$ L of 100mM phosphate buffer pH 7.5, 0.4 mM PLP, 15 mM MgCl<sub>2</sub>, and 100 mM of the specified amino acid substrate with the addition of 1.5 mM **3**, and 0.25  $\mu$ M purified TTA. The plate was incubated shaking at 1000 RPM with an orbital radius of 1.25 mm at 30 °C overnight. The reactions were quenched after a 20 h with a final concentration of 1% TFA. Supernatant was collected following centrifugation and submitted to HPLC as reported in the main text.

### Synthesis of 2-nitro- $\beta$ -OH-phenylalanine

Synthesis of a racemic mixture of 2-nitro- $\beta$ -OH-phenylalanine was performed according to a procedure described previously for phenylserines<sup>1</sup>. Triethylamine (3.07 mL, 22 mmol, 4.4 equiv) was added to a solution of glycine (375 mg, 5.0 mmol, 1.0 equiv) in water (4.0 mL). 2-Nitrobenzaldehyde (1.51 g, 10 mmol, 2.0 equiv) was added portion-wise to this solution, and the mixture was stirred overnight at ~25 °C. The color of the reaction mixture gradually changed from clear and colorless to yellow-brown. Toluene (10 mL) was added, and the triethylamine was evaporated under vacuum. The crude product was diluted with water (15 mL), and the mixture was acidified to pH 2 with HCl (6 M). The acidified solution was stirred at ~25 °C for 3 h and partitioned against ethyl acetate (2  $\times$  15 mL) to remove the unreacted 2-nitrobenzaldehyde. The aqueous layer was separated and neutralized to pH 6.0 with a saturated NaHCO<sub>3</sub> solution to precipitate the product. The mixture was stirred for 1 h at 0 °C, and the 2-nitro- $\beta$ -OH-phenylalanine was triturated with methanol followed by methanol/dichloromethane (50%, v/v), and dried under vacuum to yield 2-nitro- $\beta$ -OH-phenylalanine (221 mg, 20%, off-white solid) as a mixture of diastereomers (*anti:syn* = 4:1). <sup>1</sup>H NMR (400 MHz, D<sub>2</sub>O) *anti*-isomer:  $\delta$  8.26 (d, *J* = 8.1 Hz, 1H), 8.03-7.87 (m, 2H), 7.75-7.67 (m, 1H), 5.86 (d, *J* = 3.8 Hz, 1H), 4.30 (d, *J* = 3.8 Hz, 1H); *syn*-isomer:  $\delta$  8.26 (d, *J* = 8.1 Hz, 1H), 8.03-7.87 (m, 2H), 7.75-7.67 (m, 1H), 6.02 (d, *J* = 4.3 Hz, 1H), 4.24 (d, *J* = 4.4 Hz, 1H).

LC-MS method for standard: Waters ACQUITY Premier column, 3.0 min run, flow rate=0.5 mL/min, 95%-5% water/acetonitrile, retention time=0.24 min, ESI.

### Mass spectrometry confirmation of $\beta$ -OH nsAAs using in vitro TTA-ADH coupled assay

Mass spectrometry (MS) measurements for small molecule metabolites were submitted to a Waters ACQUITY Arc UPLC H-Class with a diode array coupled to a Waters ACQUITY QDa Mass Detector. Metabolite compounds were analyzed using a Waters Cortecs UPLC C18 column with an initial mobile phase of solvent A/B = 95/5 (solvent A, water, 0.1% formic acid; solvent B, acetonitrile, 0.1% formic acid) for 5 min with a gradient elution from (A/B) 95/5 to 10/90 for 5-7 min, an isocratic flow at 10/90 for 7-10

min, then gradient from 10/90 to 95/5 for 10-10.5 min and a final isocratic step for 10-12 min. Flow rate was maintained at 1 mL min<sup>-1</sup>.

## II. Supplementary Tables

**Table S1: Absorbance of investigated aldehydes at 340 nm in phosphate buffer.**

| <b>Aldehyde</b> | <b>Abs at 1mM (340 nm)</b> | <b>Final concentration in ADH assay (mM)</b> |
|-----------------|----------------------------|----------------------------------------------|
| <b>1</b>        | 0.2452                     | 1                                            |
| <b>2</b>        | 0.3799                     | 1                                            |
| <b>3</b>        | 0.4418                     | 1                                            |
| <b>4</b>        | 0.3092                     | 1                                            |
| <b>5</b>        | 4                          | 0.25                                         |
| <b>6</b>        | 0.2291                     | 1                                            |
| <b>7</b>        | 0.2612                     | 1                                            |
| <b>8</b>        | 0.2796                     | 1                                            |
| <b>9</b>        | 0.2412                     | 1                                            |
| <b>10</b>       | 0.6106                     | 1                                            |
| <b>11</b>       | 0.2952                     | 1                                            |
| <b>12</b>       | 0.7088                     | 1                                            |
| <b>13</b>       | 0.2328                     | 1                                            |
| <b>14</b>       | 0.244                      | 1                                            |
| <b>15</b>       | 0.3858                     | 1                                            |
| <b>16</b>       | 0.4201                     | 1                                            |
| <b>Compound</b> | <b>Abs at 340 nm</b>       | <b>Final concentration in ADH assay (mM)</b> |
| <b>PLP</b>      | 0.4273                     | 0.4                                          |
| <b>NADH</b>     | 0.9133                     | 0.5                                          |
| <b>L-Thr</b>    | 0.2233                     | 100                                          |

**Table S2. Predicted attributes of selected threonine transaldolases screened in this study.**

| Threonine transaldolase | Accession Number | Host Organism                                   | Class    | Host Genome Assembly for antiSMASH | antiSMASH BGC Type | antiSMASH Most similar known cluster (% similarity) |
|-------------------------|------------------|-------------------------------------------------|----------|------------------------------------|--------------------|-----------------------------------------------------|
| ObiH                    | ARJ35753.1       | <i>Pseudomonas fluorescens</i>                  | Bacteria | KX931446.1*                        | Obafluorin         | 100%                                                |
| PiTtA                   | WP_095149064.1   | <i>Pseudomonas sp. Irchel_s3a18</i>             | Bacteria | NZ_FYDV01000019.1                  | Obafluorin         | 85%                                                 |
| BsTTA                   | WP_060149112.1   | <i>Burkholderia stagnalis</i>                   | Bacteria | NZ_QTPN01000035.1                  | Obafluorin         | 71%                                                 |
| CsTTA                   | WP_018749561.1   | <i>Chitiniphilus shinanonensis</i><br>DSM 23277 | Bacteria | NZ_KB895358.1                      | Obafluorin         | 85%                                                 |
| BuTTA                   | WP_080410754.1   | <i>Burkholderia ubonensis</i>                   | Bacteria | NZ_MECN01000006.1                  | N/A                |                                                     |
| StTTA                   | WP_101279775.1   | <i>Streptomyces (multi-species)</i>             | Bacteria | NZ_CP031742.1                      | N/A                |                                                     |
| TmTTA                   | WP_188596100     | <i>Thermocodium modestius</i>                   | Archaea  | NZ_BMNL01000002.1                  | N/A                |                                                     |
| RaTTA                   | GIH11859         | <i>Rugosimonospora africana</i>                 | Bacteria | BONZ01000001.1                     | Spicamycin         | 27%                                                 |
| SNTTA                   | ADZ45329         | <i>Streptomyces sp. NRRL 30471</i>              | Bacteria | HQ257512.1                         | Muraymycin         | 100%                                                |
| NoTTA                   | WP_052373448     | <i>Nocardia otitidiscaviarum</i>                | Bacteria | JADLPU010000004.1                  | N/A                |                                                     |
| KaTTA                   | WP_033354341     | <i>Kitatospora aureofaciens</i>                 | Bacteria | NZ_JNWR01000048.1                  | Valclavam          | 64%                                                 |
| PbTTA                   | MBN2478762.1     | <i>Parachlamydiales bacterium</i>               | Bacteria | JAFQY010000010.1                   | N/A                |                                                     |
| DbTTA                   | MBI5609283       | <i>Deltaproteobacteria bacterium</i>            | Bacteria | JACRCU010000288.1                  | N/A                |                                                     |

\*Accession number for the obafluorin biosynthesis gene cluster

**Table S3. Strains and Plasmids used in this study.**

| Number                        | Name                  | Relevant genotype                                                                                                                                                                                                                      | Source                          |
|-------------------------------|-----------------------|----------------------------------------------------------------------------------------------------------------------------------------------------------------------------------------------------------------------------------------|---------------------------------|
| <b><i>E. coli</i> strains</b> |                       |                                                                                                                                                                                                                                        |                                 |
|                               | DH5 $\alpha$          | F- $\Phi$ 80 <i>lacZ</i> $\Delta$ M15 $\Delta$ ( <i>lacZYA-argF</i> ) U169 <i>recA1 endA1 hsdR17</i> (rK-, mK+) <i>phoA supE44 <math>\lambda</math>- thi-1 gyrA96 relA1</i>                                                            | NEB                             |
|                               | MG1655                | F- $\lambda$ - <i>ihvG- rfb-50 rph-1</i>                                                                                                                                                                                               | ATCC 700926                     |
|                               | MG1655 (DE3)          | F- $\lambda$ - <i>ihvG- rfb-50 rph-1</i> ( $\lambda$ .DE3)<br>$\lambda$ .DE3 = $\lambda$ .sBamHIo $\Delta$ EcoRI-B int::( <i>lacI</i> ::PlacUV5::T7 gene1) i21 $\Delta$ <i>nin5</i>                                                    | Previous study <sup>2</sup>     |
|                               | RARE                  | MG1655(DE3) $\Delta$ <i>dkgB <math>\Delta</math>yeaE <math>\Delta</math>(yqhC-dkgA) <math>\Delta</math>yahK <math>\Delta</math>yjgB</i>                                                                                                | Previous study <sup>2</sup>     |
|                               | BL21 (DE3)            | <i>thiA2 [lon] ompT gal</i> ( $\lambda$ .DE3) [dcm] $\Delta$ <i>hsdS</i>                                                                                                                                                               | NEB                             |
| 1-13                          | MAJ01-MAJ13           | DH5 $\alpha$ harboring TTA expression plasmids P1-P13                                                                                                                                                                                  | This study                      |
| 14-26                         | MAJ14-MAJ26           | BL21 (DE3) harboring TTA expression plasmids P1-P13                                                                                                                                                                                    | This study                      |
| 27-39                         | MAJ27-MAJ39           | MG1655 (DE3) harboring TTA expression plasmids P1-P13                                                                                                                                                                                  | This study                      |
| 40-52                         | MAJ40-MAJ52           | DH5 $\alpha$ harboring SUMO-tagged TTA expression plasmids P14-P26                                                                                                                                                                     | This study                      |
| 53-65                         | MAJ53-MAJ65           | BL21 (DE3) harboring SUMO-tagged TTA expression plasmids P14-P26                                                                                                                                                                       | This study                      |
| 66-78                         | MAJ66-MAJ78           | MG1655 (DE3) harboring SUMO-tagged TTA expression plasmids P14-P26                                                                                                                                                                     | This study                      |
| 79-91                         | MAJ79-MAJ91           | RARE harboring SUMO-tagged TTA expression plasmids P14-P26                                                                                                                                                                             | This study                      |
| 92                            | MAJ92                 | DH5 $\alpha$ harboring TTA expression plasmid P27                                                                                                                                                                                      | This study                      |
| 93-96                         | MAJ93-96              | DH5 $\alpha$ harboring CAR expression plasmids P28-P31                                                                                                                                                                                 | Previous studies <sup>2,3</sup> |
| 97                            | MAJ97                 | RARE harboring pACYC-niCAR-sfp (P28) and pZE-SUMO-PbTTA(P25)                                                                                                                                                                           | This study                      |
| 98                            | MAJ98                 | RARE harboring pACYC-SUMO-PbTTA (P27)                                                                                                                                                                                                  | This study                      |
| 99                            | MAJ99                 | RARE harboring pZE-mavCAR-sfp (P29) and pACYC-SUMO-PbTTA (P27)                                                                                                                                                                         | This study                      |
| 100                           | MAJ100                | RARE harboring pZE-mmCAR-sfp (P30) and pACYC-SUMO-PbTTA (P27)                                                                                                                                                                          | This study                      |
| 101                           | MAJ101                | RARE harboring pZE-trCAR-sfp (P31) and pACYC-SUMO-PbTTA (P27)                                                                                                                                                                          | This study                      |
| 102-105                       | MAJ102-105            | BL21 (DE3) harboring CAR expression plasmids P28-31                                                                                                                                                                                    | Previous study <sup>3</sup>     |
| 106-109                       | MAJ106-109            | DH5 $\alpha$ harboring ADH expression plasmids P32-P35                                                                                                                                                                                 | This study                      |
| 110-113                       | MAJ110-113            | BL21 (DE3) harboring ADH expression plasmids P32-35                                                                                                                                                                                    | This study                      |
| 114                           | MAJ114                | DH5 $\alpha$ harboring PTDH expression plasmids P36. pET15b-17X-PTDH was a gift from Wilfred van der Donk (Addgene plasmid # 166786; <a href="http://n2t.net/addgene:166786">http://n2t.net/addgene:166786</a> ; RRID:Addgene 166786). | Previous study <sup>4</sup>     |
| 115                           | MAJ115                | BL21 (DE3) harboring PTDH expression plasmid P36                                                                                                                                                                                       | This study                      |
| <b>Plasmids</b>               |                       |                                                                                                                                                                                                                                        |                                 |
| P1                            | pZE-ObiH              | ColE1 ori, Kan <sup>R</sup> , TetR, Tet promoter with a codon optimized <i>obiH</i> gene bearing an N-terminal hexahistidine tag.                                                                                                      | This study                      |
| P2                            | pZE-PITTA             | ColE1 ori, Kan <sup>R</sup> , TetR, Tet promoter with a codon optimized <i>piTTA</i> gene bearing an N-terminal hexahistidine tag.                                                                                                     | This study                      |
| P3                            | pZE-BsTTA             | ColE1 ori, Kan <sup>R</sup> , TetR, Tet promoter with a codon optimized <i>bsTTA</i> gene bearing an N-terminal hexahistidine tag.                                                                                                     | This study                      |
| P4                            | pZE-CsTTA             | ColE1 ori, Kan <sup>R</sup> , TetR, Tet promoter with a codon optimized <i>csTTA</i> gene bearing an N-terminal hexahistidine tag.                                                                                                     | This study                      |
| P5                            | pZE-BuTTA             | ColE1 ori, Kan <sup>R</sup> , TetR, Tet promoter with a codon optimized <i>buTTA2</i> gene bearing an N-terminal hexahistidine tag.                                                                                                    | This study                      |
| P6                            | pZE-STTA- $\Delta$ 36 | ColE1 ori, Kan <sup>R</sup> , TetR, Tet promoter with a codon optimized <i>stTTA-<math>\Delta</math>36</i> gene bearing an N-terminal hexahistidine tag.                                                                               | This study                      |
| P7                            | pZE-TmTTA             | ColE1 ori, Kan <sup>R</sup> , TetR, Tet promoter with a codon optimized <i>tmTTA</i> gene bearing an N-terminal hexahistidine tag.                                                                                                     | This study                      |
| P8                            | pZE-RaTTA             | ColE1 ori, Kan <sup>R</sup> , TetR, Tet promoter with a codon optimized <i>raTTA</i> gene bearing an N-terminal hexahistidine tag.                                                                                                     | This study                      |
| P9                            | pZE-SNTTA             | ColE1 ori, Kan <sup>R</sup> , TetR, Tet promoter with a codon optimized <i>snTTA</i> gene bearing an N-terminal hexahistidine tag.                                                                                                     | This study                      |
| P10                           | pZE-NoTTA             | ColE1 ori, Kan <sup>R</sup> , TetR, Tet promoter with a codon optimized <i>noTTA</i> gene bearing an N-terminal hexahistidine tag.                                                                                                     | This study                      |
| P11                           | pZE-KaTTA             | ColE1 ori, Kan <sup>R</sup> , TetR, Tet promoter with a codon optimized <i>kaTTA</i> gene bearing an N-terminal hexahistidine tag.                                                                                                     | This study                      |
| P12                           | pZE-PbTTA             | ColE1 ori, Kan <sup>R</sup> , TetR, Tet promoter with a codon optimized <i>pbTTA</i> gene bearing an N-terminal hexahistidine tag.                                                                                                     | This study                      |
| P13                           | pZE-DbTTA             | ColE1 ori, Kan <sup>R</sup> , TetR, Tet promoter with a codon optimized <i>dbTTA</i> gene bearing an N-terminal hexahistidine tag.                                                                                                     | This study                      |
| P14                           | pZE-SUMO-ObiH         | ColE1 ori, Kan <sup>R</sup> , TetR, Tet promoter with a codon optimized <i>obiH</i> gene bearing an N-terminal hexahistidine tag followed by a SUMO tag and a TEV protease cleavage site.                                              | This study                      |
| P15                           | pZE-SUMO-PITTA        | ColE1 ori, Kan <sup>R</sup> , TetR, Tet promoter with a codon optimized <i>piTTA</i> gene bearing an N-terminal hexahistidine tag followed by a SUMO tag and a TEV protease cleavage site.                                             | This study                      |
| P16                           | pZE-SUMO-BsTTA        | ColE1 ori, Kan <sup>R</sup> , TetR, Tet promoter with a codon optimized <i>bsTTA</i> gene bearing an N-terminal hexahistidine tag followed by a SUMO tag and a TEV protease cleavage site.                                             | This study                      |
| P17                           | pZE-SUMO-CsTTA        | ColE1 ori, Kan <sup>R</sup> , TetR, Tet promoter with a codon optimized <i>csTTA</i> gene bearing an N-terminal hexahistidine tag followed by a SUMO tag and a TEV protease cleavage site.                                             | This study                      |



|     |                    |                                                                                                                                                                                                                                                           |                             |
|-----|--------------------|-----------------------------------------------------------------------------------------------------------------------------------------------------------------------------------------------------------------------------------------------------------|-----------------------------|
| P18 | pZE-SUMO-BuTTA     | ColE1 ori, Kan <sup>R</sup> , TetR, Tet promoter with a codon optimized <i>buTTA</i> gene bearing an N-terminal hexahistidine tag followed by a SUMO tag and a TEV protease cleavage site.                                                                | This study                  |
| P19 | pZE-SUMO-StTTA-Δ36 | ColE1 ori, Kan <sup>R</sup> , TetR, Tet promoter with a codon optimized <i>stTTA-Δ36</i> gene bearing an N-terminal hexahistidine tag followed by a SUMO tag and a TEV protease cleavage site.                                                            | This study                  |
| P20 | pZE-SUMO-TmTTA     | ColE1 ori, Kan <sup>R</sup> , TetR, Tet promoter with a codon optimized <i>tmTTA</i> gene bearing an N-terminal hexahistidine tag followed by a SUMO tag and a TEV protease cleavage site.                                                                | This study                  |
| P21 | pZE-SUMO-RaTTA     | ColE1 ori, Kan <sup>R</sup> , TetR, Tet promoter with a codon optimized <i>raTTA</i> gene bearing an N-terminal hexahistidine tag followed by a SUMO tag and a TEV protease cleavage site.                                                                | This study                  |
| P22 | pZE-SUMO-SNTTA     | ColE1 ori, Kan <sup>R</sup> , TetR, Tet promoter with a codon optimized <i>snTTA</i> gene bearing an N-terminal hexahistidine tag followed by a SUMO tag and a TEV protease cleavage site.                                                                | This study                  |
| P23 | pZE-SUMO-NoTTA     | ColE1 ori, Kan <sup>R</sup> , TetR, Tet promoter with a codon optimized <i>noTTA</i> gene bearing an N-terminal hexahistidine tag followed by a SUMO tag and a TEV protease cleavage site.                                                                | This study                  |
| P24 | pZE-SUMO-KaTTA     | ColE1 ori, Kan <sup>R</sup> , TetR, Tet promoter with a codon optimized <i>kaTTA</i> gene bearing an N-terminal hexahistidine tag followed by a SUMO tag and a TEV protease cleavage site.                                                                | This study                  |
| P25 | pZE-SUMO-PbTTA     | ColE1 ori, Kan <sup>R</sup> , TetR, Tet promoter with a codon optimized <i>pbTTA</i> gene bearing an N-terminal hexahistidine tag followed by a SUMO tag and a TEV protease cleavage site.                                                                | This study                  |
| P26 | pZE-SUMO-DbTTA     | ColE1 ori, Kan <sup>R</sup> , TetR, Tet promoter with a codon optimized <i>dbTTA</i> gene bearing an N-terminal hexahistidine tag followed by a SUMO tag and a TEV protease cleavage site.                                                                | This study                  |
| P27 | pACYC-SUMO-PbTTA   | P15A ori, Cm <sup>R</sup> , <i>lacI</i> , <i>T7lac</i> with codon optimized SUMO-tagged PbTTA                                                                                                                                                             | This study                  |
| P28 | pACYC-niCAR-sfp    | pACYCDuet-1 harboring a codon optimized carboxylic acid reductase from <i>Nocardia iowensis</i> (niCAR) and a codon optimized phosphopantetheinyl transferase from <i>Bacillus subtilis</i> (sfp). P15A ori, Cm <sup>R</sup> , <i>lacI</i> , <i>T7lac</i> | Previous study <sup>2</sup> |
| P29 | pZE-mavCAR-sfp     | ColE1 Ori, Kan <sup>R</sup> , TetR, Tet promoter with a codon optimized carboxylic acid reductase from <i>Mycobacterium avium</i> (mavCAR) and a codon optimized phosphopantetheinyl transferase from <i>Bacillus subtilis</i> (sfp).                     | Previous study <sup>3</sup> |
| P30 | pZE-mmCAR-sfp      | ColE1 Ori, Kan <sup>R</sup> , TetR, Tet promoter with a codon optimized carboxylic acid reductase from <i>Mycobacterium marinum</i> (mmCAR) and a codon optimized phosphopantetheinyl transferase from <i>Bacillus subtilis</i> (sfp).                    | Previous study <sup>3</sup> |
| P31 | pZE-trCAR-sfp      | ColE1 Ori, Kan <sup>R</sup> , TetR, Tet promoter with a codon optimized carboxylic acid reductase from <i>Trichoderma reesei</i> (trCAR) and a codon optimized phosphopantetheinyl transferase from <i>Bacillus subtilis</i> (sfp).                       | Previous study <sup>3</sup> |
| P32 | pZE-eutG-Ctermhis  | ColE1 Ori, Kan <sup>R</sup> , TetR, Tet promoter with an alcohol dehydrogenase (eutG) from <i>Escherichia coli</i> .                                                                                                                                      | This study                  |
| P33 | pZE-adhP-Ctermhis  | ColE1 Ori, Kan <sup>R</sup> , TetR, Tet promoter with an alcohol dehydrogenase (adhP) from <i>Escherichia coli</i> .                                                                                                                                      | This study                  |
| P34 | pZE-adhE-Ctermhis  | ColE1 Ori, Kan <sup>R</sup> , TetR, Tet promoter with an alcohol dehydrogenase (adhE) from <i>Escherichia coli</i> .                                                                                                                                      | This study                  |
| P35 | pZE-fucO-Ctermhis  | ColE1 Ori, Kan <sup>R</sup> , TetR, Tet promoter with an alcohol dehydrogenase (fucO) from <i>Escherichia coli</i> .                                                                                                                                      | This study                  |
| P36 | pET15b-17X-PTDH    | pBR322 ori, Amp <sup>R</sup> , <i>LacI</i> , T7 promoter with a phosphite dehydrogenase (PTDH) from <i>Pseudomonas stutzeri</i> containing the following mutations for activity: A196R, T201S, A328T, E352N, C356D.                                       | Previous study <sup>4</sup> |

**Table S4. Oligonucleotides used in this study.**

All primers denoted FWD and REV were used for cloning whereas any primers containing SEQ were used for sequencing the associated plasmid.

| Oligo Name                 | Sequence                                                             |
|----------------------------|----------------------------------------------------------------------|
| pZE backbone FWD           | CTTGATGGGGGATCCCATGGTA                                               |
| pZE backbone REV           | GTGGTGATGATGGTGATGGCTGCCATGGTACCTTTCTCCTCTTAATGAATTCG                |
| StTTA REV                  | CCATGGGATCCCCATCAAGTTAACGAAAGACCTCACCCAACA                           |
| BuTTA REV                  | CCATGGGATCCCCATCAAGTTAAGCGATTACTTCTCCATCAA                           |
| PiTTA REV                  | CCATGGGATCCCCATCAAGTTAGCGTTGAATTCCACGCTC                             |
| ObiH-REV                   | CCATGGGATCCCCATCAAGTTAACGTTGGGCTCCTTGG                               |
| BsTTA REV                  | CCATGGGATCCCCATCAAGTTAACGCATCACGCCTTGG                               |
| CsTTA REV                  | CCATGGGATCCCCATCAAGTTAGCGTAACGCCTCCCAATA                             |
| StTTA FWD                  | GCCATCACCATCATCACCACATGGGAGTTTGGGCAGGC                               |
| BuTTA FWD                  | GCCATCACCATCATCACCACATGATGACGGACTTCGCA                               |
| PiTTA FWD                  | GCCATCACCATCATCACCACATGAAACAAGACGAATCGAATG                           |
| ObiH-FWD                   | GCCATCACCATCATCACCACATGTCCAATGTCAAGCAACA                             |
| BsTTA FWD                  | GCCATCACCATCATCACCACATGAAACAGGAACCTACGGG                             |
| CsTTA FWD                  | GCCATCACCATCATCACCACATGACGCGCACGACCC                                 |
| BsTTA SEQ                  | GTGCCCGAACATTCAGAG                                                   |
| StTTA SEQ                  | GCGTATATTGCGTTCCG                                                    |
| BuTTA SEQ                  | ACCATCCTGCGATGAAG                                                    |
| PiTTA SEQ                  | AAAGGGGTTTATTGCGTTCA                                                 |
| CsTTA SEQ                  | GCGGGTCATTACATCGT                                                    |
| PiTTA SUMO FWD             | GAAAATCTGTATTTTCAGGGCAAACAAGACGAATCGAATGTTG                          |
| TEV SUMO REV               | GCCCTGAAAATACAGATTTTCTG                                              |
| BsTTA SUMO FWD             | GAAAATCTGTATTTTCAGGGCAAACAAGAACCTACGGGC                              |
| StTTA SUMO FWD             | AAAATCTGTATTTTCAGGGCGGAGTTTGGGCAGGCGAC                               |
| pZE split REV V1           | CCTGGTATCTTTATAGTCCTGTCCG                                            |
| CsTTA SUMO FWD             | AAAATCTGTATTTTCAGGGCACGCCACGACCCCCAG                                 |
| pZE split REV V2           | GGGAAACGCCTGGTATCTTTATAGTCTGTCCG                                     |
| ObiH SUMO FWD              | AAAATCTGTATTTTCAGGGCTCCAATGTCAAGCAACAGAC                             |
| PbTTA SUMO FWD             | AAAATCTGTATTTTCAGGGCGAAACCTCCCTGAAGGATTTTG                           |
| BuTTA SUMO FWD             | AAAATCTGTATTTTCAGGGCACGGACTTCGCACAGGC                                |
| BuTTA SUMO REV             | ACGCCTGGTATCTTTATAGTCTGTCC                                           |
| RaTTA gene fwd             | GCCATCACCATCATCACCACATGTTGGAAATTGTGGGGG                              |
| RaTTA gene rev             | CCATGGGATCCCCATCAAGTTAACGATAAAGCCACGACG                              |
| pZE bbone fwd              | CTTGATGGGGGATCCCATG                                                  |
| pZE bbone rev              | GTGGTGATGATGGTGATGG                                                  |
| TmTTA gene fwd             | GCCATCACCATCATCACCACATGCGCGAGGAAGAAGC                                |
| TmTTA gene rev             | CCATGGGATCCCCATCAAGTTACAGTAACGGAAGACAAGGG                            |
| SnTTA gene fwd             | GCCATCACCATCATCACCACATGACATCAAGCGACGATTG                             |
| SnTTA gene rev             | CCATGGGATCCCCATCAAGTTACCCATGAAAAAGTCCCG                              |
| NoTTA gene fwd             | GCCATCACCATCATCACCACATGAATACGTTTCGATATCTTAGAAC                       |
| NoTTA gene rev             | CCATGGGATCCCCATCAAGTTATGCGACTGATACCTCC                               |
| PbTTA gene fwd             | GCCATCACCATCATCACCACATGGAACCTCCCTGAAGG                               |
| PbTTA gene rev             | CCATGGGATCCCCATCAAGTTAGAATAAATCTCTGTAGATCTCG                         |
| DbTTA gene fwd             | GCCATCACCATCATCACCACATTGACGAATAATCGCGAGC                             |
| DbTTA gene rev             | CCATGGGATCCCCATCAAGTTAAGAGGCATAGACCCGC                               |
| KaTTA gene fwd             | GCCATCACCATCATCACCACATGGATGTTGTTGGCTGC                               |
| KaTTA gene rev             | CCATGGGATCCCCATCAAGTTAAGGCTACTGCCAAGGG                               |
| SUMO tag fwd               | ATGTCCTGCAGGACTC                                                     |
| SUMO tag rev               | GCCCTGAAAATACAGATTTTCTGAACCTCCACCTCCCAGCCACCACCAGCCGCCACCAATCTGTTCCG |
| pZE-SWNB bbone rev         | TCCGAGTCTGCAGGGACATGTGGTGATGATGGTGATGG                               |
| pZE- TmTTA bbone fwd       | AAAATCTGTATTTTCAGGGCATGCGCGAGGAAGAAGC                                |
| pZE- RaTTA bbone fwd       | AAAATCTGTATTTTCAGGGCATGTTGGAAATTGTGGGGG                              |
| pZE- SnTTA bbone fwd       | AAAATCTGTATTTTCAGGGCATGACATCAAGCGACGATTG                             |
| pZE- NoTTA bbone fwd       | AAAATCTGTATTTTCAGGGCATGAATACGTTTCGATATCTTAGAAC                       |
| pZE- TmTTA bbone rev       | TCCGAGTCTGCAGGGACATGTGGTGATGATGGTGATGGC                              |
| pZE- DbTTA bbone fwd       | AAAATCTGTATTTTCAGGGCTTGACGAATAATCGCGAGC                              |
| pZE- KaTTA bbone fwd       | AAAATCTGTATTTTCAGGGCATGGATGTTGTTGGCTGC                               |
| pACYC bbone fwd            | AAGCTTGATGGGGGATC                                                    |
| pACYC bbone rev            | GGTATATCTCCTTATAAAGTTAAAC                                            |
| pACYC SUMO-PbTTA12 ins fwd | CTTTAATAAGGAGATATACCATGGGCAGCAGCCATCA                                |
| pACYC SUMO-PbTTA12 ins rev | GGATCCCCATCAAGCTTTTAGAATAAATCTCTCGTAGATCTCGT                         |
| pZE-cterm-his bbone fwd    | GGCAGCAGCCATCACCATC                                                  |
| pZE-cterm-his bbone rev    | GGTACCTTCTCCTCTTAATGAA                                               |
| pZE eutG fwd               | TTAAAGAGGAGAAAAGGTACCATGCAAAAATGAATTGCAGACC                          |
| pZE eutG rev               | TGATGGTGATGGCTGCTGCCCTGCCCGCTGCGTACAG                                |
| pZE adhP fwd               | TTAAAGAGGAGAAAAGGTACCATGAAGGCTGCAGTTGTTAC                            |

|              |                                           |
|--------------|-------------------------------------------|
| pZE adhP rev | TGATGGTGATGGCTGCTGCCGTGACGGAAATCAATCACCA  |
| pZE adhE fwd | TTAAAGAGGAGAAAGGTACCATGGCTGTTACTAATGTCGC  |
| pZE adhE rev | TGATGGTGATGGCTGCTGCCAGCGGATTTTTCGCTTT     |
| pZE fucO fwd | TTAAAGAGGAGAAAGGTACCATGGCTAACAGAATGATTCTG |
| pZE fucO rev | TGATGGTGATGGCTGCTGCCCCAGGCGGTATGGTAAAG    |

**Table S5. DNA G-Blocks/Twist gene fragments for cloning in this study. Start codons for each gene are underlined.**

| Oligo Name | Protein Accession Number | Sequence                                                                                                                                                                                                                                                                                                                                                                                                                                                                                                                                                                                                                                                                                                                                                                                                                                                                                                                                                                                                                                                                                                                                                                                                                                                                                                                                                             |
|------------|--------------------------|----------------------------------------------------------------------------------------------------------------------------------------------------------------------------------------------------------------------------------------------------------------------------------------------------------------------------------------------------------------------------------------------------------------------------------------------------------------------------------------------------------------------------------------------------------------------------------------------------------------------------------------------------------------------------------------------------------------------------------------------------------------------------------------------------------------------------------------------------------------------------------------------------------------------------------------------------------------------------------------------------------------------------------------------------------------------------------------------------------------------------------------------------------------------------------------------------------------------------------------------------------------------------------------------------------------------------------------------------------------------|
| ObiH       | ARJ35753.1               | <u>ATG</u> TCCAATGTCAAGCAACAGACAGCTCAGATCGTGGATTGGTTATCAAGCACTTTAGGTAAAGACCATCAGTATCGTGAAGATAGCTTGAGTCTTACAGCGAACGAGAAGACTATCCGTGACGCTGGTACGTTTGACGTCGGGCTCGACCGCAGGGGCGTTTTACTGTAGTTTCCCTTTGAGGTACCTGCCGGGGAATGGCACTTCCCGGAGCCAGGGCATATGAATGCCATCGCAGACCAGGTACGTGATCTGGGAAAACTGATCGGAGCACAGGC GTTTGACTGGCGCCCAAACGGCGGCTCTACAGCAGAACAGGCGTTGATGTTAGCGGCGTGCAAGCCCGGGGAAGGATTTGCCATTTGCGCACCCGCGACGGAGGCCATTTGCGCTTGAATCACTGGCGCAGAAAATGGGAATTGAAATTTCCACTTGGCAGTTAACCCACAGTGGTGTATTGATGTGGCGAAATTTGGATGAAATGGTCCGCGCAATCCGCACATCCGTATTGTAATTCGGACCAGTCTTTAAGCTTCGCTGGCAGCCTTGGCGGA AATTCGTTCCGTACTGCCGGATTGCGTACTTTGACGTACGACATGAGTCACGATGGAGGTTTGATTATGGGTGGCGTTTTCGATTTCGCTTTAAGTTGCGGAGCAGACATCGTACACGGAAACACACATAAGACGATCCCTGTCCACAGAAAGGGTACATCGGATTTAAGAGTGCTCAACACCCCGCTGTTAGTGGATACCAGCCTTTGGGTA TGCCCTCACTGCAATCCAACCTGCCATGCGGAACAGCTGCCCCAATGTGGGTAGCATTCAAAGAAATGGA ACTGTTGCGGGCGTATTACGCGGCCCAAATTTGTGTCAAATGCTAAGACCTTGGCAGCTCACTTGCACGAGT TAGGATTAGACGTTACGGGGGAGAGCTTTGGGTTTACCCAGACTACCAGGTACACTTCGCTGTAGCGGAC TTACAAAAGCCTTGGATTTATGTGTTAATCACTTACGCGAGGGGGCATCCGTAGCACGAATATCGAGATT CCGGAAAACCAGGGGTGCATGGTATTCGTTTGGGTGTGCAAGCGATGACTCGCCGTGGCATGAAGGAAA AGGATTTGAGGTTGGTAGCTCGTTTCAATTCGCGATCTTTACTTCAAGAAAACCTGAGCCAGGAAATGCTC AGCAGATTAAGGAAATTTGACAGCGTTCCTTACGCGCTCTGGCATATCTTTTGATAATTATTTAGACGA GGAGTTATTGGCTGCGGTGTACCAAGGAGCCCAACGTTAA |
| PITTA      | WP_095149064.1           | <u>ATG</u> AAACAGCAAGCAATCGAATGTTGGTCTGTGCTATTGACTGGGCTCAGACCCTGGACAGGACTACAA GTACCGCCAGGACACACTTCACTTACAGCTAACGAAAACCTACCCTTACAGGCTTGTTCGTCTGACCAGCG GCTCTACAGCCGGGGCATTATCACTGCTTTTTCCGTTCCCGGTTCTCTTGGAGAAATGGCATTTCCCGAG ACCCAGACAAATGAACGAGATCGCCGATGATCTGCGGGTTTTGCCAAACGATGATGGGTGCGCAGGC ATTCGATTGGCGCCCTAATGGTGGGAGCCCGGCTGAACAGGCTTGTGTTAGCGGCTTGTAAACAAGGT GAAGGTTTTGTACACTTGCACATCGCGATGGGGGGCATTGCTTTAGAGCAATGGCCACAAAATGGG TATTGATTTTCCATTTACCTGTGGATCGCAAAGTCTGCTTATTGACGTTGCTAAGCTTGTACATGGTC CGCCGTAACCCCTCACATCCGTATCGTAATCTTGATCAATCCTTCAAACCTTGGTGGCAGCCGTTAGCCGAG ATTCGTGCAATCCTTCCCGATTATGCACTTAACTTATGATATGTCTCATGATGGGGGCTTATTTGCGGTG GGGTCTTCGATAGCCATTGGCTGCGGGTGGATATCGCTACGGCAATCAACAAGACTTCCGGG GCCTCAAAGGGGTTTTATTGCGTTCAGAGCGCTCAGCACCCCTGTTGGTGGAAACCAGTCTTTGGGTAT GTCCACACTTACAGAGTAACTGTCAGCCGAACTTTACCCTTATGTGGGCGCATCAAGGAGATGGAA GCTTTTGGCCCGCTATGCCACCAGATGGTGCCAATGCTAAGGCGTTGGCCAAACCACTCACGAGCT TGGTTTTAAATGTTTCGGGAGAGTCTTTGGATTTACAGAGACGCACCAGGTGCATTTGCGCGTAGGAGATTT ACAACAGGCGTTGAGTATGTGCGTGGACTGTTACACGCGGGCGGAATCCGCTCGACTAACATCGAGATC CCGGAAAAGCCGGGATGCACGGGATCCGCTTGGGGTACAGGCCATGACCCCGCCTGATGAAGAG GATGACTTTTCGTCGCTGCTGGCCTTATCGCTGACCTTTACTTCAAGCGTACCAGCAACCTGCACGTTGTC TCAAAGGTGAAGGAGTTATTGGCGATTTTCCACTTGCCTCTGGCCTACTGTTGATCAACAAATCGA CGAGTCTGCGCCGCTTGGCTTGGCGTGAATTCACGCTAA                          |
| BsTTA      | WP_060149112.1           | <u>ATG</u> AAACAGGAACCTACGGGCGCCTTCGAGGTTGCCACGGTGTGAACGACATTTTTCTTGTGACCATCG CTACCGCGAGGTAACCTTATGCTTACCGCTAATGAAAATATCCTTACAGGCTTGTACGTTTACGTCCCG AAGTACCGCCGGGGCTTTTATCATGTGAGCTTCCCGTTCGATGATCCCGATGGAGAATGGCACTTCCCG AAACCGGACATATGCACGCGGTGGCGGATAAAGTTCTGATGTTTTGGGGAAGTCAATGGATGCACACATA TTTGATTTGGCGTCCAAACGGTGGCTCTGCGCGGGAACAGGCGTTAATGCTTGGCGCCTGTCAACCCGGTG ATGGTTTCGTTTCCATTCGCACATGGAGACGGAGGGCACTTGCCTTAGAGGCTCTGGCATCAAAGCAGGT ATCGAAATCTTTCATCTGCCAGTTGACCCAGACAGCTGCTTATTGATGTGAACTGTTAGCTAGCTTATG TGACGCACATCCACGTATTGCTATTGTCATTTGGACAGTCAATTAACCTTTCGCTGGCAGCCTCTGCGCGCG ATCCGTGATGCACTTCTGACATGTACGTTGACTTACGATGCTAGCCACGATGGAGGGCTGGTATGGG AGGATGGTTTTGACAGCCCGCTTGGTGTGGTGTGACTGACGTAGTTTATGGTAATCCCAAAAACCTTACGAG GCCTCAGAAAGCTTATGTTGCTTTGGCTCTGCTGAGCACCCCTTATTAGCAGATACCAGTATTTGGGTGTG CCGAACATTCAGAGCAATTTGCATGCAGAACAGCTGCCATCTATTTGGGTTGCATTGAAAGAAATCGAAGC ATACGGGCTGCATATGCGTCCCAGGTAGTCCGTAACGCGACAGCGTTTTCTGCTGCTTACAGCAGCGT GGGCTTACGCTGTCAAGGAGTCTTTGGGTTACCAGAAACCCATCAAGTCCACTTACGCGTGGGACCC CGGAGGCAGCGTTATTGACATGTCGTGACGTGTTGCACCCGGGGGAATCCGTACCAGCAACATCGAGCT TCCGGTAAGCCGGGGGTACATGGCATCCGCTTGGAGTACAGGCAATGACCGCTGTGGAAATGGTCGAG CGCGACTTTGAAACCGTCCCGACTTATCGCTGCGCTTTGTACAGCAACGATACACCCGAGGATGTGGC TCCGGATGTGAAACGTTCTGGGTGACTTCCATTATCCCACTTGCATTTTCTTTCGACGGGGGTATGAC TGACGCTTTCGCTGCCACTGCGCAAGGCGTATGCGTTAA    |
| CsTTA      | WP_018749561.1           | <u>ATG</u> ACGCGCACGACCCCCAGGCACGTCATGTCGTGGAGCGCCTGAATTCAGTTTTAGGACAAGACTACC GCTATCGTGAGGATTGTCTGAGCCTTACCGCAATGAGAAGTATCCTTCCGCATTAGTGCCTTAGCCGGG AGTGCCACAGCTGGAGCCTTCTACCACTGAGCTTTCCGTTTGGAGGTGCCAGGAGAATGTTATTTTCC TGAGAGCGGTGATGTTGGGGAACCTGCTCAACAGCTGAATGAATAGGTGCTTCTGTTATTAGCGCGGGTA CATTGATTTGGCGCCCCAACGGTGGCTCGCCAGCGGAGCAGGCTTATGATGTTAGCGGCTGCAAGCAGCG TGAAGGATGGTCCATTTTCTCATCGTACAGGTTGCGCACTTTGCGCTGGAGAATGTTGCGCAAAAAGCTG GTATCGACATCTTTCATTTGCTGTAGATCCCAAGAGCTTGTGATGATGTTGACGCTTGCAGCCTTGCAGGCTTG TCCGCGCAATCCTCAAATCCGTTATGATCTTGGACAGTCTTTAAGTTACGCTGGCAACCCCTTGCAG CGATCCGCAAGGTTCTTCCCCATGCTGACACTTACCTATGACACCTCTCATGATGTTGGACTTATTATGG GAGGATTTTTGATTCTCCCTTGCATTGTTGGTGCAGACGTAATTCATGGCAACAGCATAAAAACAGTCCCG GACCGCAGAGGGGTATATCGCTTCAAATCCGCTGAGCATCTTTGTTGGTTGACAGCTTAAAGATGCTGTGGCTT TGCCACATTTGCACTAAGTGTGATGCGGAGCTTTTGCCTCAATGTGGTGGCTTTTAAAGAAATGGAG GCTTTCCGACATGATTACGCCCTCAAGTGGCCCGCAACGCGAAGGCTCTGGCGGGTCAATTTACATCGTTT AGGATTCAGGTTTTAGGGCAGGCTTTCCGTTTCACTGAAACCCACCAAGTGCATTTTCCGATGAGGACT TGCAGCAAGCGCTTATTTGTGATGAACACCTTGCATCGTGGGGGATCCGCTACAGAAATGAAATC CCGGGTAAACCCGGCATTACGGGATTCGCTGGCGTTCAGGCTATGACCCGCTGCGGCTGCGCGAAG                                                                                                                                                                                        |

|               |                |                                                                                                                                                                                                                                                                                                                                                                                                                                                                                                                                                                                                                                                                                                                                                                                                                                                                                                                                                                                                                                                                                                                                                                                                                                                                                                                                                                                                                                                                           |
|---------------|----------------|---------------------------------------------------------------------------------------------------------------------------------------------------------------------------------------------------------------------------------------------------------------------------------------------------------------------------------------------------------------------------------------------------------------------------------------------------------------------------------------------------------------------------------------------------------------------------------------------------------------------------------------------------------------------------------------------------------------------------------------------------------------------------------------------------------------------------------------------------------------------------------------------------------------------------------------------------------------------------------------------------------------------------------------------------------------------------------------------------------------------------------------------------------------------------------------------------------------------------------------------------------------------------------------------------------------------------------------------------------------------------------------------------------------------------------------------------------------------------|
|               |                | ATGATTTTGGAGCAGGTGGCGCGTTTTATCGCGGACTTGCACCTCCGCAAAGCAGACCCAGCCGGAGTCGCA<br>GCACAAGTAGCGGAATTTCTTCGTGCTTTTCCTTTGGCACCATTACATTACTCATTGATCAGGAACTGGATC<br>ATGAGTTATTGCGAGTCCCTTATTGGGGAGGCGTTACGCTAA                                                                                                                                                                                                                                                                                                                                                                                                                                                                                                                                                                                                                                                                                                                                                                                                                                                                                                                                                                                                                                                                                                                                                                                                                                                                        |
| BuTTA         | WP_080410754.1 | ATGATGACGGACTTCGCACAGGCGGTAGTAAACCCGTTTCGTAGATGAGCAGCGTAAGTCCCGTTTATAGTA<br>AAAAATCTCAACATCTTCGATAGTCTTCATAGCGATTTTGCCTTGGATAATTTATACCGCGCAAGCCACTTA<br>AGTCTGACCGCCTCTGAGAATTATCCATCCCGCTTTGTCGCGACGCTGGGAGCCGGTATGCAAGGCGGTTT<br>CTATGAATTCGCGCCACCTTACGCGCTAACCCAGGAGAGTGGTACTTCCCTGACAGTGGCGCGCAGTCCG<br>AGTCTGGTGCAGAACTTGTCTAGTTTGGGAAAACAGTTTTCGAGGCTAACTCGTTTACTGGCGTCCCAA<br>CGGGGATCAGCAGCGGAACAGGCTGTGCTTTTAGGCACATGTGCCGCGGGATGGCTTCGTCACCTTT<br>GCTCACAAGGATGGCGCCACTTTGCTCTGGAAGAGTTGGCCAGAAGTGGGAGTTAGCATCTTCCATCT<br>GCCAATCGAGGAGAAGAGTCTTTTATTGATGTTGACCCGCTGGCGACATTAATCAAAGATAACCCCCACAT<br>TAAGCTTGAATTCGACCAATCGTTTAAAGCTTCGCTGGCAACCTTTACTGCAAACTCCGCAAGCCTTACC<br>GGAATCAGTCGTATTATCGTACGACGCGAGTACGACGGGGGATTAATCATCGCGCAATGCCTGCCCCAG<br>CCATTACTTTTGGAGCGGATATTGTTACGCGGAATACACACAAGACAATTCGGGGCCGCAAAAGGGTTA<br>CATTGCGTTCAAGAATGTAGACCATCTGCGATGAAGCATGTTAGCGATTGGCTTGTCTTATGCAATC<br>TAACTCGCATGCCGAGTTGATCGCACCCATGTATATTGCCTTGGTTGAAATGTCTTTGTACGGACGCGATTA<br>CGCGGAGCAGGTTATTAATAAGTAAAGCGCTTGGCACACGCGCTGCACGCCGAGGGAGTACCGCTCCG<br>GGCGAATCGTTCCGTTTTACAGAAACACACCAAGTTTCATGTTGTTGTTGGTGGTAAAGCGTAAAGCGTTGA<br>GTTAGTTACTGGTACCTTGGCATTGGCAGGAATTCGCTGCAACAACATCGAGATTCCAGGCGCGAACGGCT<br>TATTTGGTTTGGCTTAGGAGTGCAGGCAATTGACGCGTCCGCGAATTAAGAGACCGGGATGGCTGAAGTT<br>GCCCGTTTTTATGTCGCTTATTCTGAAAACGAATCCCCACGCCATCCGCAACGAATTCGTCATTT<br>CTTGAATCATATCTATTAATACGCTTATTATTAGATGCTCACTATTATACCCCTTCGGGTATTAAT<br>GATGGAGGAAGTAATCGCTTAA |
| StTTA-<br>Δ36 | WP_101279775.1 | ATGGGAGTTTGGCGAGGCGACCGTGTGCCAAGTTTGGAAACGCTTAGCGTCCGATTTGTTTTAGACAA<br>CACTTATCGCGAACAACACCTGAGCTTACGCGCTTCGAGAATATCCTTCAAACCTGGTACGATGTTGGG<br>AGCGGGATTACAGGGGGGTTCTATGAGTTTGTCCGCGCTATCCGCGCAAGAGCAGGAGATGGGCATTC<br>CCGACTCCGAGCGAACGCGTCCCTTGTAGGGAAGCTGACTGGCATTGGTCCGCAATGTTGCAAGCCG<br>CAACATTCGACTGGCGTCCGACGCGGATCCGTGGCCGAGCAAGCAGTATTGCTGGGACGTGTGGAC<br>GCGGGGATGGTTTTGTCACTTCGCGCATAGGATGGGGGCCACTTTGCGTTGAGAGTGTCCGGGTGTC<br>TGCCGGAGTCAACAGTATCATCTGCCATGGTAGACCGCACGCTTCTGATCGATGTCGATGTTTTGGCTA<br>CTTTATGCGCTGAACACCCGAAATTAAGTTAGTAATCTTAGATCAGTCTTCAAATACGCTGGCAACCCG<br>TTGCTCAAATCCGCGCCGCGCTGCCCGAGGGCGTATTTTTAGCTTATGACGCGTCTCATGACGGTGT<br>ATTGCTGGGGTGTTCGCCACAGCTACCCTGTTAGGGCCGATGCACTTATGCAACACGCGCAAAAAC<br>GATCGCGGGGCTCAAAGGGCTATATTGCGTTCGCGGACGCTGAGCACCCCAAGTTACGTCGCCGTCAGT<br>GATTGGGTGTGTCCACAGATGACAGTAATTACATGCGGAACTGATCGCACCCATGTATGTAGCACTGTC<br>GGAGTCCGCTTATGTCATGCGTATGCCCGCAAACTTAGCAAACGCCCAAGCGTTAGCGCACGGAT<br>TACACGAAGAGGGGGTCCGCGTATCTGGAGAGTCCCTCGGCTTACAGAACTCATCAAGTACACGCTCGT<br>ACGGTTACGCTGCGGATGCTCTGCGCTGTCTTGGGTGAGCTGGCCAGGAGGAAATCCGTACGACAA<br>ACATTGAGGTACCAGGGGCAAAAGGACTGCATGTTTGGCTTAGGAGTTCAAAGTACTGACTCGCCGTTG<br>TTACCGGAGCCACAGATGCGTGAAGTGGCACGCTTGGTTGCCAAAAGTTTTGTTGCGCGTCCGCAACCG<br>CGGCTGTACGCGCGGAGTTGCGGATTTGTTACAGCATCACCGCTTAGATCAGTTGGCGTATTCCTCGAT<br>TCTACGTTGACTCGCCAGCTGCGGCGGTTTTGTTGGTGAGGTCCTTCGTTAA                                                                         |
| TmTTA         | WP_188596100   | CCATCACCATCATCACCACATGTCGCGAGGAAGAAGCGATTGCGGCGCTGTCAAAATACGCGCAATCATGG<br>ACCGCCATAAACAATGGCGCGCGCTGAGACAATTAACCTAATCCAAGCGAAAACGATGTCGCGGTTA<br>GCCGAGTATTTCTACTAAATGATATGATGGGACGTTATGCTGAAGGAACGATTGGTAAACGCTACTACAA<br>GGTGTATCGCTGGTGGACGAGCGGCAAAATGTTAGTCGATTTAATGAGCTTTGTTTTCTCGCGCTTT<br>ACAGACGTCGCGCCATCAGCGGTACAGTTGCCAATATGGCGGTGATCACTCAGTCCGCGGGCTTGGGG<br>AGAAGATCGCCTTTTACCAACAGCCGCGGGGGCCATTTTCGCATAACGAGACTGGTGCSCCAAGCA<br>TTGGATTACGTTTTCATATTTGCGGTGGTCTCAGGAAAACCTTTAACGTGATGACGATGTCGCGCTG<br>CTTAATTCGCGAAGAACGCCAAAATGGTGTGCTTGGGGCGTCACTTTATTTTCTCATCCATTAAA<br>GAATTAGCGGACGCTGCTACAGAGGTAGGTGCGGTTTCTGATGCATGACTCAGTCACTGCTGTTAAT<br>TGCTGGTCACTCAGTTCCCTATCCTCTTGAACCTGGGCGGACATTAAGTACGACGACGCAAAAACCTT<br>TCCGGGACCCAAAGGCGGTGTGATTTTACCACACGTGAAGATTTGTTCAAGGAGATCCAACGCTCAGTTT<br>CCCAGTAATGACATCGAATTATCACTTGCATCGCTATGCCTCGACGATTGTGACAGCTATTGATGAGTAC<br>GTATGGAGACGAATATGCACTACAGTCCGCTCCAACGCGAAAGCACTGGCGGAACTTATGCAAACT<br>GGTTTACCTGTAGTTGCCAAGAACACGCGTTCACGGCTACCCACCAGGTGGCAATGGATGTTTCAAAT<br>TGAGGGCGGGGGCCAACTCGTAAGCGTTGGAGGACGCGAATAATTGTAACAAGAATGCTGCTGCC<br>TGGATAAGTCTCCGCTCAAACCATCCGGTATTCCGATGGGAGTTCAAGAATGACTCGCATGGGAATGGG<br>TAAAGGCGAGATGGCGCCGTGGCGGAGCTGATCGAAAGTGGTATCAAAGGGTTCGAACCGTCTAAA<br>GTAAAGCCAGAGGTGCTGAGTTGCCCGCGGTTTCAAAGGTACGCTATGTTTGTATTATCTACTTTG<br>GGTTGAATTGCCCTGTCTCCGTTACTGTAACCTGATGGGGATCCCATG                                                                                  |
| RaTTA         | GIH11859       | CCATCACCATCATCACCACATGTTGGAATTTGGGGGACCATGAACGCAAAATGGCGAGTGCAGTGAATC<br>TTATCCCGAGCGAGAATTTATTAACACCCGCGCACGTTTAGCCTACCTTTCAGATGCGTATTCGCGTTATTT<br>TTTCGATGAGCGTGAGGTGTTCCGAAAGTGGTCTTTCCAAGGGGGAGCATTGTGGCGAAGTACAACGT<br>GAGGTTTTAGTGCCTCTGGTACAAAAGGTAACCTGGGACGCGCATGTGGACGTCGCTGGGATTAGTGCC<br>TGAATGCCATGACCGTGGCTTGGCAGCGTTTTGGCGCCGTTGACCGCTTACAATTACAGTACCGCCCG<br>CCACGGAGGCCATCAGTACCGCAGTTGTGGCCGACACTTTGGGCATCGTGCAGAGCTTACCTTTT<br>CGTGATGAAGCCTGGTGGGAGGTTGACTTGCCTGCCTTAGCGGAGTTAGTAGCTGCTACTGATCCGGCGTT<br>AGTTTATGTAGATCAGGCCACCGCTCTGGTCCACTGGATTTAGCCGGAGTAACTCCGCAACCGTCAAGG<br>TTTCCCTGGGACACAGTACCGCCAGACATCGACATCAACGCGTTCTTGGTGGGATTGTTGGG<br>CAACCATTGACTTGGGGGCGGACAGTTACGGAGGCTCCACGCATAAGACCTTTGCGGGCCCTCATAAGG<br>CTTTATTGCTTACTAACGATGACGCGAGTGGCGATAAAGTACCTCCGTCGAGTGAATCTGTTTCCGCATC<br>ATCATGTACGCGAGCTTGTAGCTTATAGCTATCGCCATGGTAGAGTTCCGCGAATGTCGCGGGTAGATTAC<br>GCGCAGGCAAGTTTGAAGTGCAGCGGCGTTGCCCGCGCCCTGGCCGATGCCGGGCTGGCGTACAA<br>GACGCGGGTGGTGTCTTAAACCGTACGCATCAAGTATGGTACGAACCTGCTGCGGATCCGCAACCGGATTA<br>GCGAGCGCTTGTTCGATGCGGGGATCGTTGTAACCCCTTACAACCCCTGCGCAAGTACCGGCTTTAGGA<br>ATCCGATGGGGTTAAATGAGGCGACCAAGTTAGGATTCGGAGAACCAGGAAATGGCCGAGTTAGCAGGGT<br>TGCTTACGGGTGTAGCGTTGACCGTATCCCGTGGCTGAGGCGGGAGCGGTGAGCTGCCATGCGCTCA<br>AGCGCTCGTCCCGCTATTGTTTTCTGAAGATGTGGTCCCTTAAGCTTCGCGGATTCGCGGAGCTACCGGAGCCT<br>CAGGTGCAGGTGGATGAGTTGGCTGCGTGGCTTTATCGTTAACTTGTGGGGATCCCATG                                                |

|                     |                     |                                                                                                                                                                                                                                                                                                                                                                                                                                                                                                                                                                                                                                                                                                                                                                                                                                                                                                                                                                                                                                                                                                                                                                                                                                                                                                                                                                                                                                                                                                |
|---------------------|---------------------|------------------------------------------------------------------------------------------------------------------------------------------------------------------------------------------------------------------------------------------------------------------------------------------------------------------------------------------------------------------------------------------------------------------------------------------------------------------------------------------------------------------------------------------------------------------------------------------------------------------------------------------------------------------------------------------------------------------------------------------------------------------------------------------------------------------------------------------------------------------------------------------------------------------------------------------------------------------------------------------------------------------------------------------------------------------------------------------------------------------------------------------------------------------------------------------------------------------------------------------------------------------------------------------------------------------------------------------------------------------------------------------------------------------------------------------------------------------------------------------------|
| <p><b>SnTTA</b></p> | <p>ADZ45329</p>     | <p>CCATCACCATCATCACCACATGACATCAAGCGACGATTGTGCTGCGAGTCTGACGGCTCCCGTCGCTGGCC<br/> GCGCAGAACTTTTGGCGCTGTTGGGAGAAATCGAGAAGGAGCAGCGCATCAACGAGGCCCGCTGAACTT<br/> AGTGCCCTTCAGAGAATCGCATTAGTCCCTGGGCTGGGGCGCCGTTACGTACCGATTTTTACAACCGCTATT<br/> TCTTCAACGATTCTCTGGACCCCAAGGGATGGCAATTTCTGTTGAGGGGAAGGGATTGGACGCCTGGAAAA<br/> GGAGTTGGCTCTGCCCGCTTTACGCCGTTTGGGGCGTGCAGGATCACTTAACATCCGTTCCCTGTGTAGCGTA<br/> TGAGTGCCATGCTTGTGGTCTTTTAGGTTTGGGAGCGAACCTGGGGATGGTGTAGTGTGTGTAGACGCA<br/> GAAACGGGAGGTGATTATGCTACTGGCCGCCAAATCGCAATGTTAGGCCGCCGCCCTTTGCCCGTCCGCG<br/> TGGTAGCGGGACGCGTTGATTTGGATGCTCTTCGACGGCATTAACTAGCTGCCAGTCCGTTCCCTGGTATAT<br/> CTTGACCTTCAGAATCACTTTGGGAGCTTGTGTTGCGGGAGTAGCCGAGGTATCGCACGTACAAGCCC<br/> ACGTAAGTCTGACGCTGGACTGCGCCACACATTAGGATTAATCCTTTGGGGGCTCACATAAAAAATCCATT<br/> AGACTTGGGTGCCGATACGACTGGGGGCTGACCCATAAAAACTTTCCAGGTCGCGAGAAGGGGTTTTG<br/> TTCACACGTGACGAGAACTTGAGTCGTAAGATCCGTGATGCTCAATTTTTACGATCAGTTCACATCACTTC<br/> GCCGAAACACTGGCGTTGGCCTTAGCGGCTGCAAGATTTGAGCATTTTTGGCGAGCCTATAGCCGCCAAG<br/> TCCTTATCAATGCTCGCGCTTTTGCACACCGCTTACGCGAGCGCGGATTTGGAGTGTAGGCGGCGCCG<br/> CAGCTGACGGATACTACCAAGTCTGGGTCGCTTACCTTTGAAGATCGGCAGATGCCTTTAGCGCTCA<br/> ATTGGCGTCTTGGATTCGCGCTCAATGTCCAGACTGAGTTGCCAGACATCCCTGAACCCAGCCCTCGCT<br/> TAGGCGTGAGCGAGATTACTTTAATGGTGGACGTGAGCCAGCAATGAAACGTTGGCAGAGATCTTCGCT<br/> TTGGTACGCGCAGGGGAGGCGACTAAGGCTGTCGATTTATTCCAAGTCTTCCCATGAAATGGGGGAACC<br/> GTATTTTTTACGGGATTACCTCAAGAAGCGGGACTTTTTTATGGGTAACCTTGATGGGGTCCCATG</p> |
| <p><b>NoTTA</b></p> | <p>WP_052373448</p> | <p>CCATCACCATCATCACCACATGAAATACGTTGATATCTTGAACAACCTTGCAGCTTATGAGTATGACACATC<br/> GCGCGTGTGCATTTAATTGCGTCTGAGAATCCCTGGACTCAGACACAGCTGTGCGGTATATGCTTGCAG<br/> GAACTTTAGCTCGTTACGCATTTGGGGAGCCGGGTGAGCCCAACTGGGCTTGGCCAGGCCGTGAGACTC<br/> GATTGACCTGGAAGCTGACACTGCGGACGCCCTTGGGGCTTGTGGGCGCCGATCATGTTAATCTTCGTC<br/> CGACTAGTGGTCTTTCAGCTATGACCCGTGGCCTTGTCCGCTTGGCCGAACATGCTGGGGACCGTGAACCT<br/> GTTTTATCGCTTGCAGAAATCAGATGGTGGCCATGGATCGACGGGGTTCATGGCCCGCTGTTTTGGGCTGGA<br/> CTGGCAACGCATGCCCGCTGACCCGCTACAGCGCTTGGATCTGGACGCTGCGCGTTCAGGCTCAGGCTCG<br/> CAGTGCAGCGCGTCTGCTGTTATATCTGGATGCGTTCATGGCCGCTTCTCTTTGACTTAACGGGTAT<br/> CCGCGGTGCGGTGGGTGACTCAGCTTTGATCCATTACGACGGTTCACATCCTTTGGGATTAATCGCGGGAG<br/> CCGTTTTCAAAAATCCGTTAGCTGAAGCGCCGATTCGTTGGAGGTTCTGACAAAAACCTGGCCTGGA<br/> CCGGTAGGGAAAGGGATATCGCTACCAATGATAGTGCATCTCGCTTCGATACTACGCGCCGCGGG<br/> TTGGATCTCCACCATACCCCTGCGGATCTGGCTGCACTGGCGCTTAGTACCGCCTGGATGGAGCAACATG<br/> CTGGCGACTACGCGACAGCAGTGCATAATGCCGTGCAATTAGCTGATGAATTCAGACGCGCGGCTT<br/> GAGCATCTGTGCCGATGACCGTGGTCTACGGCGAGTGCATCAAGTGTGGGTTGATATTGCTCCTATCTGTC<br/> CAGCTCCTGTGCGCGCTCAGCGTTTGTATGATGCTGGTATTGTGGTAAACGCGATTGCAATCCAGGGCTT<br/> GCCGAACCCGGCTTGGCCTGGGCGTTCAGGAGTTGACTCGCTGGGGATTAGACCGTGTGGAATGACAG<br/> TCTGACCTGGGACTGACCCAACTGCTGGTCCATAACCGCGCCACAGCAGTGGTGGCCCGCAAAATGGA<br/> AGCGTTGCGTACCGGCTGACGCTGCTGAAGATCGTATGGGCTGGAGGTTTTCTTGTGCGTGTGAT<br/> CCACAGGAGGTATCAGTCCGATACTGATGGGGATCCCATG</p>                                            |
| <p><b>KaTTA</b></p> | <p>WP_033354341</p> | <p>CCATCACCATCATCACCACATGATGTTGGCTGCCCTGGAACGTAAGCACAGTTTTAACTGTTTCCGAT<br/> TGAAAATCGCTTGTACCCCGTGTGCGCGCGCTCTGGCATCCGATGCCGTAACCCGTTATCCGTACAGTG<br/> AGACGGATGTGGCGGTGTACGGAGACGTTAGTATGCTGAATGCTGTATATGACCAATGGCTCAGTCTTACC<br/> AAGAAATTTTATGGCGCCGTCATGCATGTTTCAAGTTTTCTTCCGGACTTACACACCATGACATGATGTTAA<br/> CAGCAGTACACCCGCCAGGGGGCGGTGTAATGGTCAATTGCGCCTGAAGACGGAGGACATTATGCAACGGT<br/> TACTATTTGCCAAGGTTTTGGCTACCGCGTAGAGTACGTACCAATTCGATCGCCAGACTTTGGAAATGACTA<br/> CACTGCTTGGCGAACGACACCGCAACATCCGGCTGATGTGATCACTTTGGACGATCGACGGTATTGCG<br/> GCATGCCTGACGCGCGGCTCTGCGTGCAGCAGCCAGGCGCTGTTCTGTGTCTGGATGCAAGTCACTCT<br/> TCTGGGACTTCTTCCCGCAGCCCTGGGACCTTGGTCTTGTGCTGGCTTTGATCAATTTCTGGAAGCA<br/> CTCACAACCTTTACCGGGACCCAAAAGGGATTGTTGGTGACAACCTCCGATGACCAATGCCAAGGTC<br/> GGAGCGCGCATCCCTTTTACCGCGAGTTCATCGCATTCTGCGAGCGTGGGTTGCTGGCATTACATTAGA<br/> AGAGCTTTTGGCCCATCGCGGGGATTACGACGTCAGGTGATCGCAACCGCCGTTGAGCTGGCTCGTCAA<br/> CTTGGCGCCGCGGCTTTGACGTGGCAGGGGAAGCCTTCCGATTTACTGATACTCATAGTGTGGTCC<br/> ACCATCCAGAGGGAATACACCGCATGAGTGGGACGCTGCTGACAGCTACTGATATTGCGACCACTACA<br/> GTAGTGTCTTCAATCACTGACGTAAGTGGATTACGTTTAGGAACGCGAGGAGTTGACAGCTTTGGGGATGAA<br/> GGAAAGCATATGACTACCGTGGCAGAGCTTCTGCGCGTCTGTTTTACGCGGAACAGAGTCCGCTCAG<br/> TTGCCGCGGATGTACGCGACTTGGCTCGTTCCGTTCCAGGTGTGGCTTTCGCGGACCGTCCAGCACCCCT<br/> GGCAGTAGCCTAATTTGATGGGGATCCCATG</p>                                                                                                                             |
| <p><b>PbTTA</b></p> | <p>MBN2478762.1</p> | <p>CCATCACCATCATCACCACATGGAACCTCCCTGAAGGATTTTTGAAACTATCCTTCACTTAATTAATAAGGAG<br/> GAGATTGACTCAAATGACACCATTCATATGACCGCAACGAAAATATATGCTAAATTTGCCAAACACTACT<br/> TAAAAAGCACTTTGCTTACCGCTACCATGTGCGAATGTTTCGATGATCAAAAAGCACTGACAGTCTCCGCT<br/> CGTGTCTTATCAAAAACCTTTTATGCTGCTGCGTTGCCTTTACCCATCTTCTGTTAGAAACAACAAGCCGCTG<br/> AATACGTAAAAAAATGTTCTTCTGCTGAGTATGCGGACTTTCGTCCTTTGTCGGTATGCACACCGTTTTTTG<br/> TATCTTATCTACCTTAAACAAAACCGAAGCATGCTGTATGCTTACGACCGAATCCGTTAGGACACGCAAGC<br/> CACAGTTTTCTTATGAAGTGTGGTGGCAGAAAGTGTCTTCACTCCATTTTGTGAGAAGAAACTTGATATT<br/> GACTTAGAGAAGCTGAGTAACAATCTTGTGAGAAACCAACGCAATTTCTTTTGTATTTGGTACTCCAT<br/> TCTACCATTCGCGATCCGCGAAATTCGCGAGATTGTAGGAAACGAGCTGAAGATGATTTATGACGCCCTCG<br/> CATGTGTTGGGTTTGTATGCGGGTGGACAGTTCCAAAATCCACTTCTTGAAGGCTGTGAGCTGCTGATCGG<br/> AAATACTCACAAGACATTTCCGGGGCCGAGAAAGGCATGATCTTGTATAAAAAACAAGTCTTTGGGAAAGGA<br/> GATCGCAACAGAAATTTCAAATCAGCCATTTCTGCGCAGCATACTCATGCTATCGCCCTGTAGCTGTAC<br/> TATCATTGAAATGTATATCCAGCGGAAGAAATACGCCAACCAATCATCAAAAATCATGCTGCTTATCCAG<br/> GCATTAATCAATGAAGGTTTTAAAATTTTTAAGCGTAAAAACAGTTTAGCCTTAGTCACATGATTGCGATTA<br/> CGGGGATTTTCCGATTGATCATGATGTTGATGTCGCTTTCATTAATCTCACAATTTCCG<br/> GTATTCTGTATGACTTTCCAGCGGTGCGCATTGGCGTTACAGGAGTTACAGTAAAGAAATGAAAGAAAAG<br/> GATATGGTGAATTAGCCAAATTTTTAAGGAAATCATCTGGATCGCAAGAACATCAGCTCAAAAATCAAG<br/> GAGTTCAATAACAATTTCAATGATTTGAATATAGTCTTACGAGATCTACGAGAAGTTATTCTAATTTGATG<br/> GGGATCCCATG</p>                                                   |
| <p><b>DbTTA</b></p> | <p>MBI5609283</p>   | <p>CCATCACCATCATCACCACITGACGAATAATCGCGAGCTTATGGACCGTATCGGTTATAATCTTTCACAAGG<br/> TTTTAGTTTCAAGCCAGCATACCGCAAGTCTGGTGCCTTTATTTATTTGACTTACATGAAGCACCGCTGACCGG<br/> CAAAGCGTTCGAAAGCAAGTGGAATAAACCGCCCTACGTTGGCGAGTCTTTGGCGGACTTGGCGCTT<br/> CCGCTGTTAGCGCGTTCAGATGGCGAATTTACCGCAATCATCTTTCTCATCAATTTGACCGGCTGCG</p>                                                                                                                                                                                                                                                                                                                                                                                                                                                                                                                                                                                                                                                                                                                                                                                                                                                                                                                                                                                                                                                                                                                                                                              |

|              |  |                                                                                                                                                                                                                                                                                                                                                                                                                                                                                                                                                                                                                                                                                                                                                                                                                                                                                                                                                                                                                |
|--------------|--|----------------------------------------------------------------------------------------------------------------------------------------------------------------------------------------------------------------------------------------------------------------------------------------------------------------------------------------------------------------------------------------------------------------------------------------------------------------------------------------------------------------------------------------------------------------------------------------------------------------------------------------------------------------------------------------------------------------------------------------------------------------------------------------------------------------------------------------------------------------------------------------------------------------------------------------------------------------------------------------------------------------|
|              |  | <p>GAGTGCTCCTCACCAAATGGAGCGCTTACTTCGTGCCCATTTGGTTGTTTCAGCGCGGCATGCCGTTTCGCA<br/> ACGTTGACGCCTTGCGTGTGGCGTGCAAGAAGTCACACGCCCGCGGTTATGGACCCGGCGAGATGGCGCA<br/> GCTGGCAGAGTGGATTGCGTCAATCGTCATCGGCCGGTGCAGACCCGAGGTAGTAGCACCTGCCGTGCAA<br/> GCCATGGCTAAGCGCTTTGACACTATCTATTATACGGGGCAAACGGTGGACGGTAAACTTGATCTTCCAGA<br/> AATCGCAGCGCCGAGCGCTAAGGGCCGTTGGGTTGACTATCGCCATTTGGGAAATGATTTTGCAATGGACG<br/> ATACTGAGTTCTCCGAAATTCGCGCCTTGGGTGCTGCCGCGGGAGCCTTCCCAAACAGACCGACAGTACA<br/> GGTAACGTCTCGTTACGTTACGGAGCCCGTATTTCGTGTCGTCTAGCGGGTCATATATTAAGCACCTGGC<br/> CGACGGACAGGTCGTGAGTTGGACGCCGTAGATCCCTCAGGGGAATTGATTGACTATCATGGTGCAGCG<br/> TTGCCAGCAGTGAGAGTCTGATGCACTTCTTAGTTTACCAGAATGTGCCAGCGGGCGCAGTTGTGCACAC<br/> TCACTATTTATTAACCAACCAAGAGGCTGCCGACTTCGATGTGGCGGTGATCGCTCCTCAGGAATATGCCA<br/> GTATTGCACTTGCCCGCGCAGTAGCAGAAGCCAGTAAACGCTCCCGTATCGTGTATATTCAAAAACACGGA<br/> TTAGTGTTTTGGGGTACAGACACTGCAGATTGTCTGTCTCAGGTTTCAAACTTTATTACAACCGTCCAAATC<br/> GTCGCGCAGCTGAGGCGGTCTATGCCTTAACTTGATGGGGATCCCATG</p> |
| SUMO-<br>tag |  | <p><u>ATG</u>TCCCTGCAGGACTCGGAGGTTAACCAGGAAGCAAAGCCGGAAGTCAAACCGGAAGTAAAACCCGAAA<br/> CTCACATCAATCTGAAGGTAAGTGATGGTTCTTTCAGAGATATTCTTTAAAATAAAAAACCCAGCCTTGCG<br/> GCGTCTTATGGAAGCGTTCCGCAAACGACAAGGGAAAGAGATGGATAGCTTACGTTTTCTCTATGATGGCA<br/> TTCGCATCCAGGCGGATCAAGCTCCAGAGGACTTGGATATGGAAGATAACGACATTATCGAAGCCCATCGC<br/> GAACAGATTGGTGGC</p>                                                                                                                                                                                                                                                                                                                                                                                                                                                                                                                                                                                                                                                               |

\*For StTTA, we arbitrarily cloned a variant to contain a 36-residue truncation from the N-terminus (StTTA- $\Delta$ 36) such that its new N-terminal residue would align with the sequence of ObiH and the other candidate TTAs.

III. Supplementary Figures

Figure S1

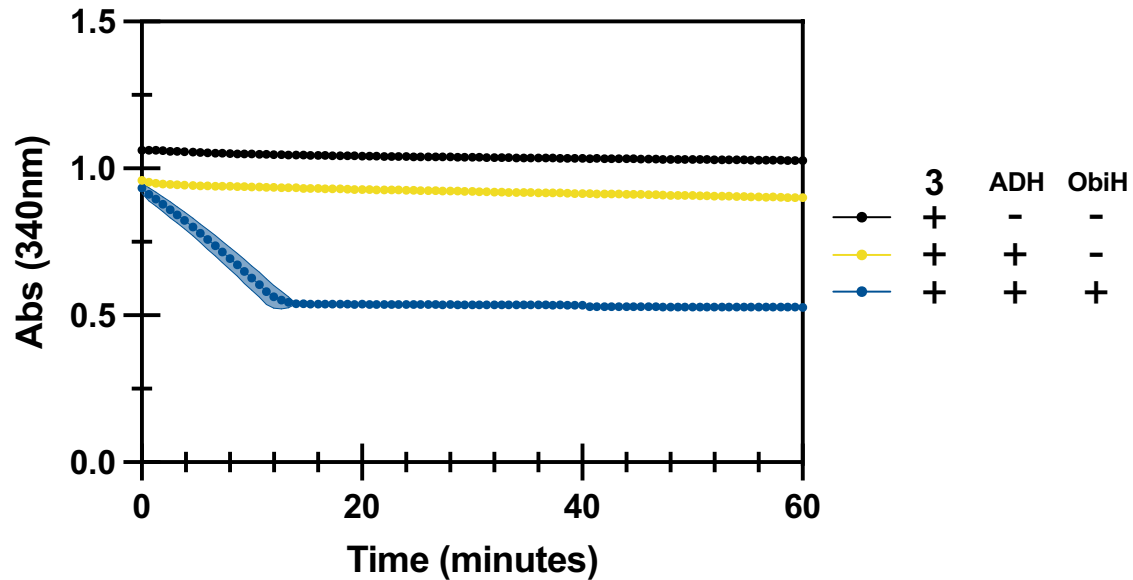

**Figure S1: TTA-ADH coupled assay optimal output.** The observed depletion of absorbance at 340nm for the condition TTA, ADH, and aldehyde compared to no depletion for negative controls with no enzyme, and no TTA. Assay performed in triplicate with shading representing the standard deviation.



Figure S2

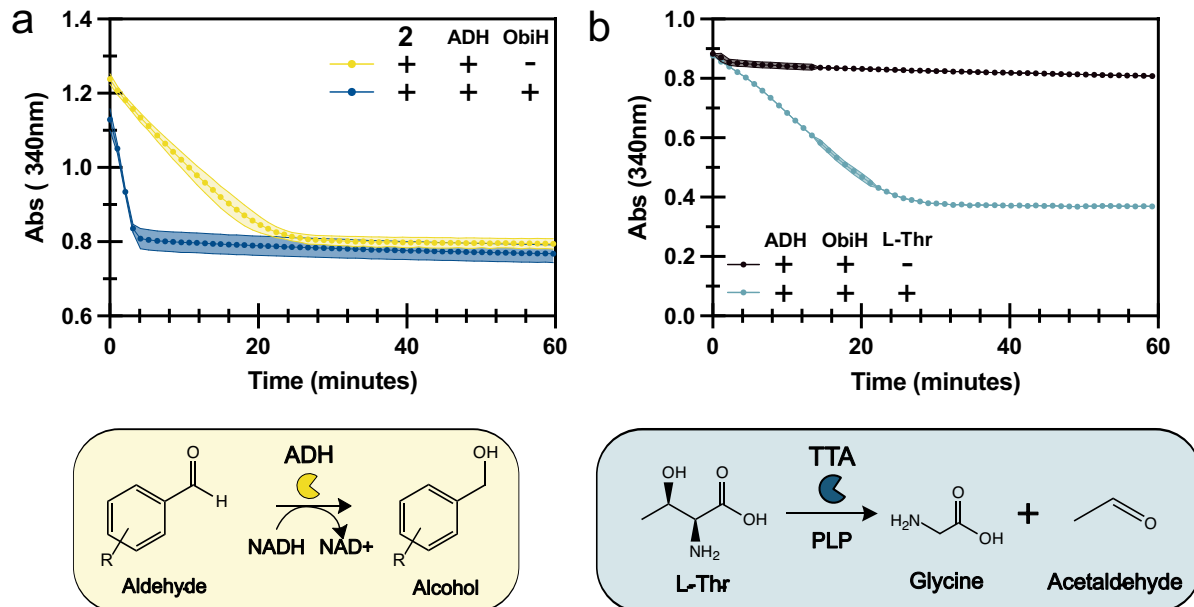

**Figure S2: TTA-ADH coupled assay background activity and reactions.** (a) Background activity of the ScADH on an aromatic aldehyde of interest leading to a depletion of NADH and corresponding loss of absorbance. Assay performed as described in the main text using 1 mM aldehyde and 1.45  $\mu$ M ObiH. (b) Background activity observed from the L-threonine reacting with the TTA and releasing acetaldehyde that is then consumed by the ADH. Assay performed as described in the main text using 12.4  $\mu$ M ObiH. Assays performed in triplicate with shading representing the standard deviation.

Figure S3

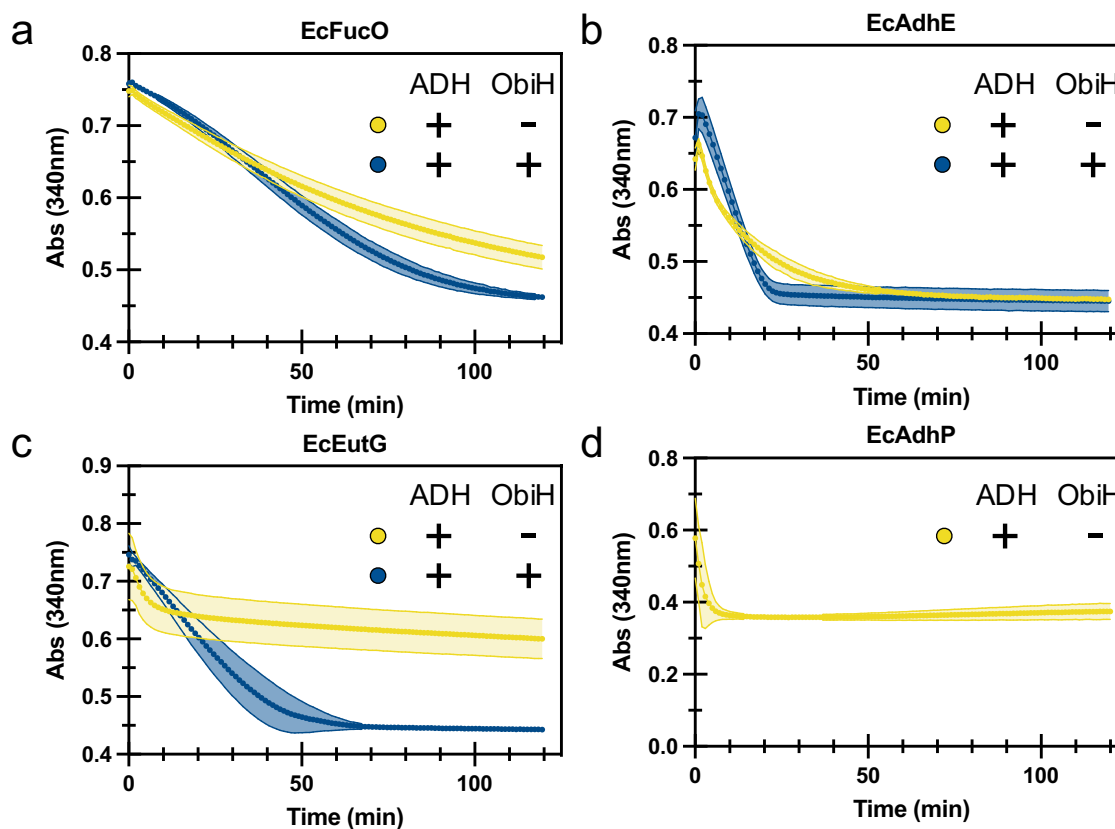

**Figure S3: Assessing alternate ADHs for background aldehyde activity.** In vitro TTA-ADH coupled assay with 4 ADHs from *E. coli* using **1** as a substrate. Each has confounding activity with ADH only control, so they were not pursued further. The final ADH concentration in the assay is listed in parenthesis following the protein name. (a) EcFucO (230  $\mu\text{g}/\text{mL}$ ) (b) EcAdhE (200  $\mu\text{g}/\text{mL}$ ) (c) EcEutG (100  $\mu\text{g}/\text{mL}$ ) (d) EcAdhP (100  $\mu\text{g}/\text{mL}$ ) which had such a rapid rate that we did not screen it in the presence of ObiH. Assay performed in triplicate with shading representing the standard deviation.

Figure S4

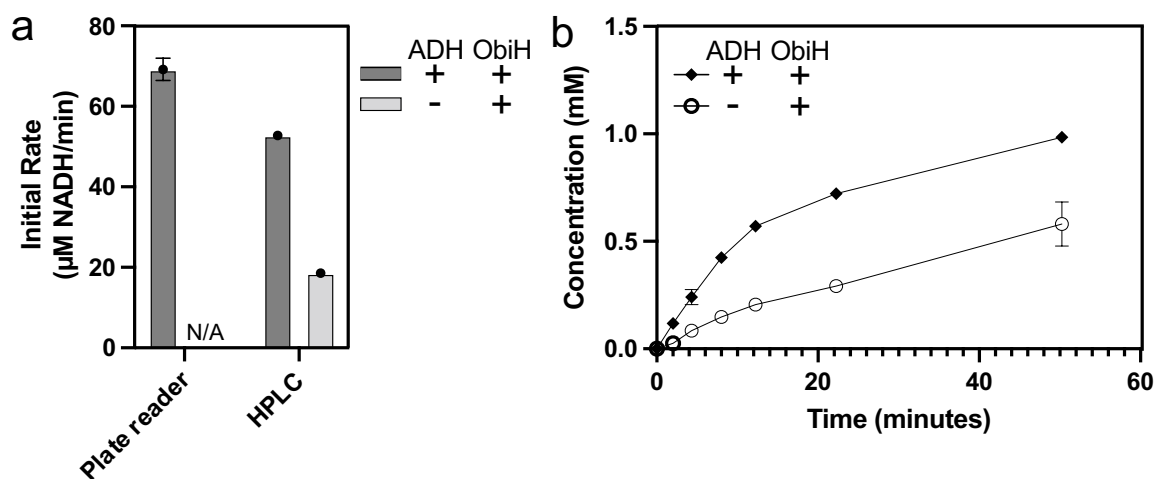

**Figure S4: Validation of the TTA-ADH assay using HPLC analysis.** (a) A comparison of the rates measured using the continuous plate reader assay and a discontinuous HPLC assay to validate the rates observed on the plate reader are accurate. **3** was used as the substrate with all other conditions described in the methods of the main text and SI. In addition to the time course assay with ObiH and ADH, the assay was also performed with only ObiH to understand the impact of the ADH on the reaction rate. Plate reader rates performed and calculated in triplicate with error bars representing the standard deviation. Discontinuous HPLC assay performed in triplicate with rate calculated using the averages for each triplicate. (b) The concentration of  $\beta\text{-OH nsAA}$  as a function of time for the HPLC-based time course assay. Assay performed in triplicate with error bars representing standard deviation.

Figure S5

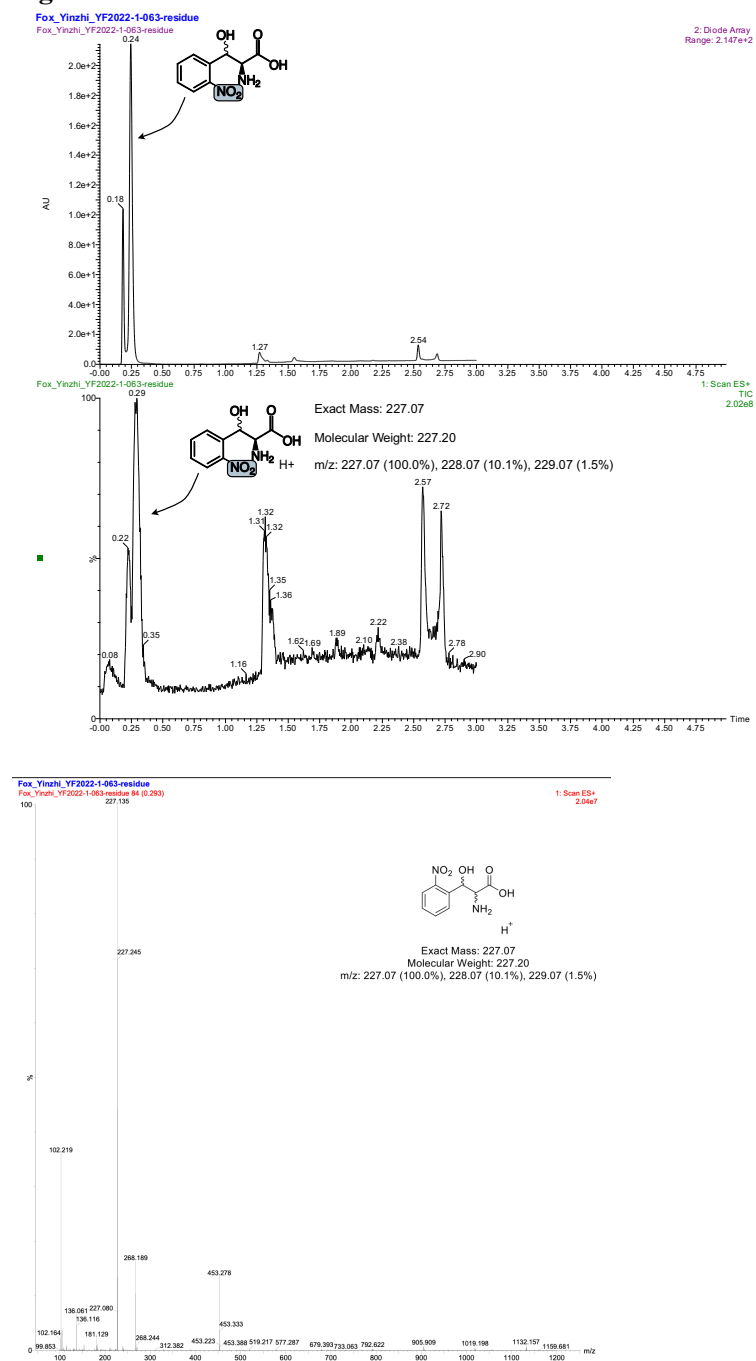

Figure S5: LC-MS for synthesized 2-nitro- $\beta$ -OH-phenylalanine. The top two charts represent the raw spectra, and the bottom chart is the specific mass for the peak highlighted. The bottom chart shows mass spectra (m/z) extracted at the highlighted elution time.

**Figure S6**

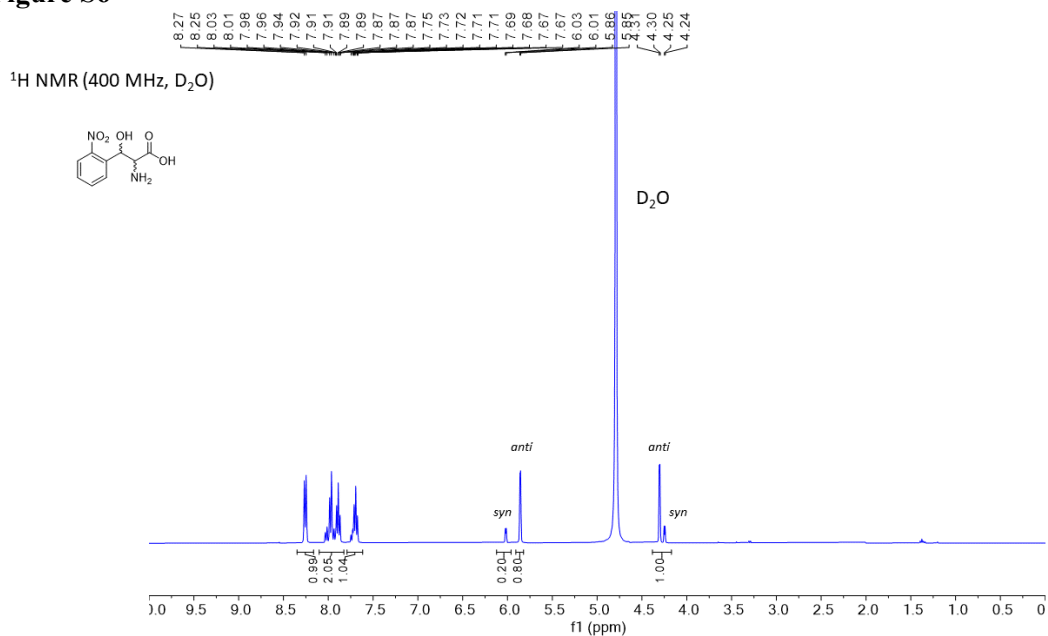

**Figure S6: <sup>1</sup>H NMR for chemically synthesized 2-nitro-β-OH-phenylalanine.** NMR spectra to confirm the chemical synthesis of 2-nitro-β-OH-phenylalanine.

Figure S7

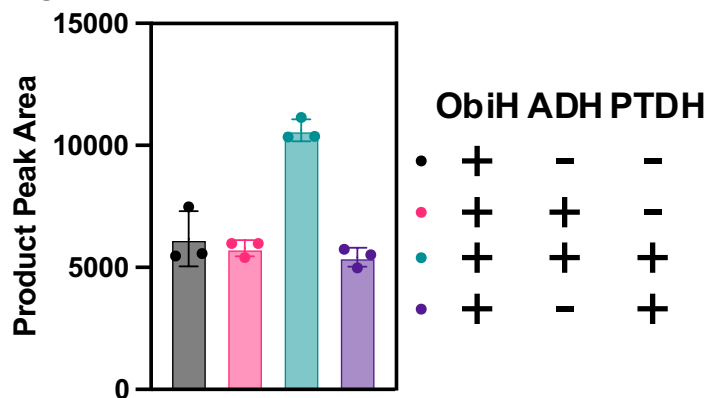

**Figure S7: Coupling ADH with co-factor regeneration for improved  $\beta$ -OH-nsAA yields.** As previously shown<sup>5</sup>, coupling the TTA to an ADH and a recycling system will improve product yields. We observed higher conversion when coupling ObiH, ADH, and an engineered phosphite dehydrogenase (PTDH)<sup>6</sup> and 10 mM of **3**. Product concentrations were measured after 24 h using the reaction conditions described in the SI. Peak area is calculated as the area under the curve for the absorbance spectra output from HPLC. Experiment performed in triplicate with each replicate represented and error bars represent the standard deviation.

Figure S8

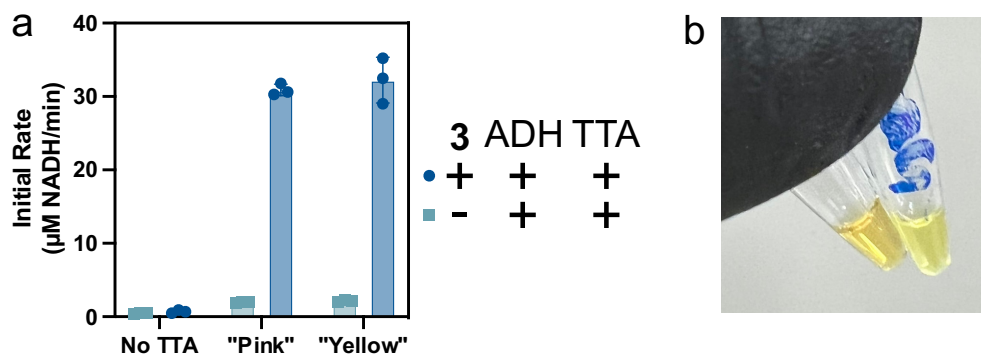

**Figure S8: Screening photo-treated TTA in the TTA-ADH coupled assay.** (a) The literature suggests that ObiH is in its most active form after being activated with light<sup>7</sup>. We used the TTA-ADH coupled assay to determine if there were any differences with photo-treated enzymes by using a sample directly from the dark -80 °C storage, "Pink", and another, that had been sitting on ice under ambient light, "Yellow", for 4 h. The rates measured with the TTA-ADH coupled assay were very similar between the two enzymes samples. Assay performed in triplicate with each replicate represented and the error bars represent the standard deviation. (b) The light exposure did change the color of the sample which we used as verification of photo-treatment prior to beginning the coupled assay. Since we did not observe differences in behavior, we proceeded with our assays without photo-treatment. We hypothesize that this is because of the extensive light exposure that occurs during the purification process.

Figure S9

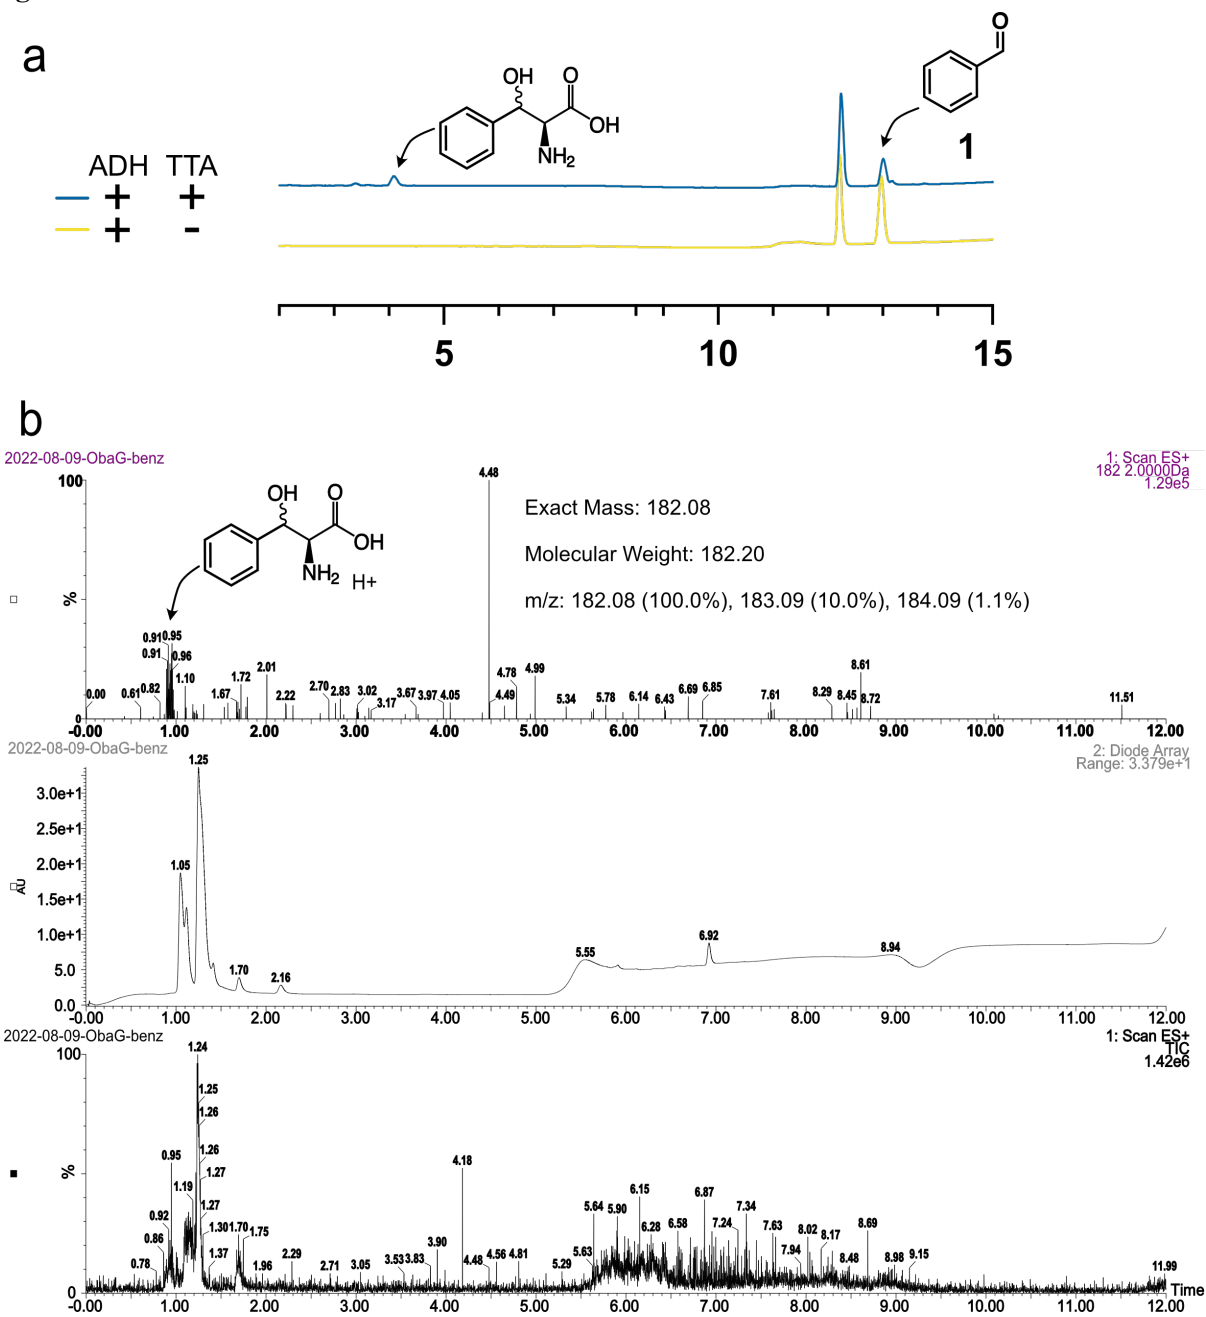

Figure S9: HPLC and LC-MS confirmation for  $\beta$ -OH-nsAA produced from benzaldehyde (1). (a) HPLC traces at 210 nm for the with and without TTA conditions. (b) LC-MS trace.



Figure S10

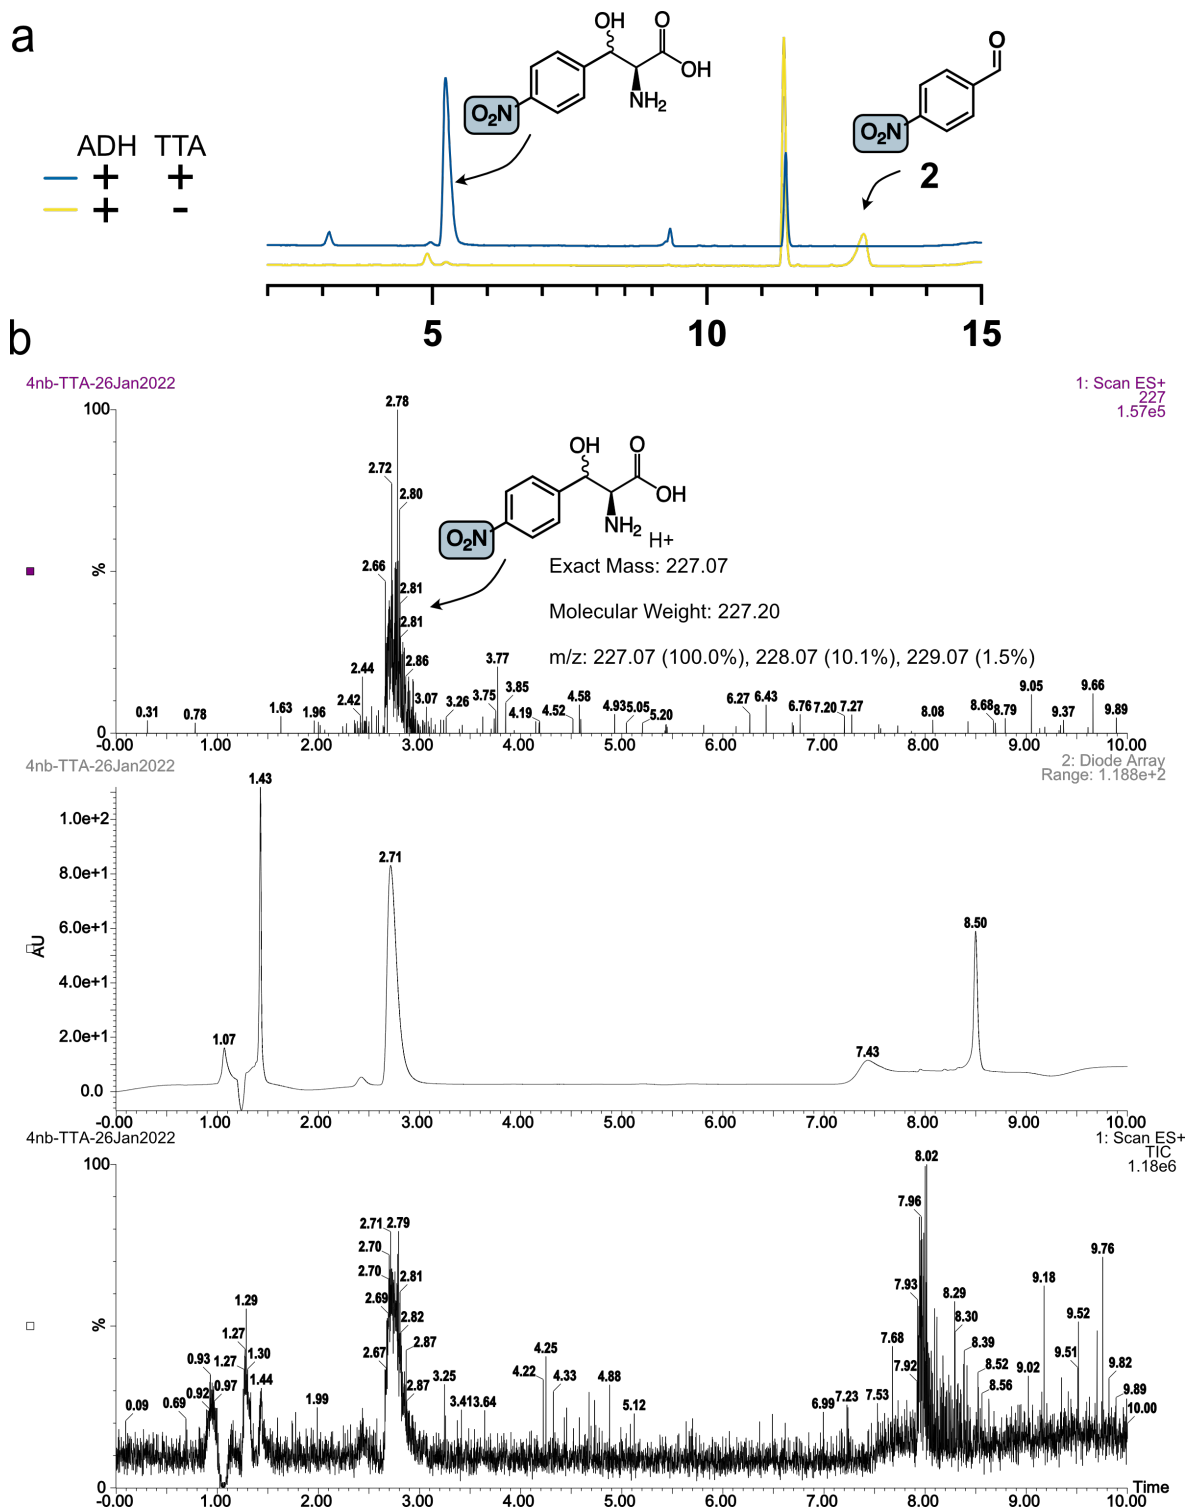

Figure S10: HPLC and LC-MS confirmation for  $\beta$ -OH-nsAA produced from 4-nitro-benzaldehyde (2). (a) HPLC traces at 280 nm for the with and without TTA conditions. (b) LC-MS trace.

Figure S11

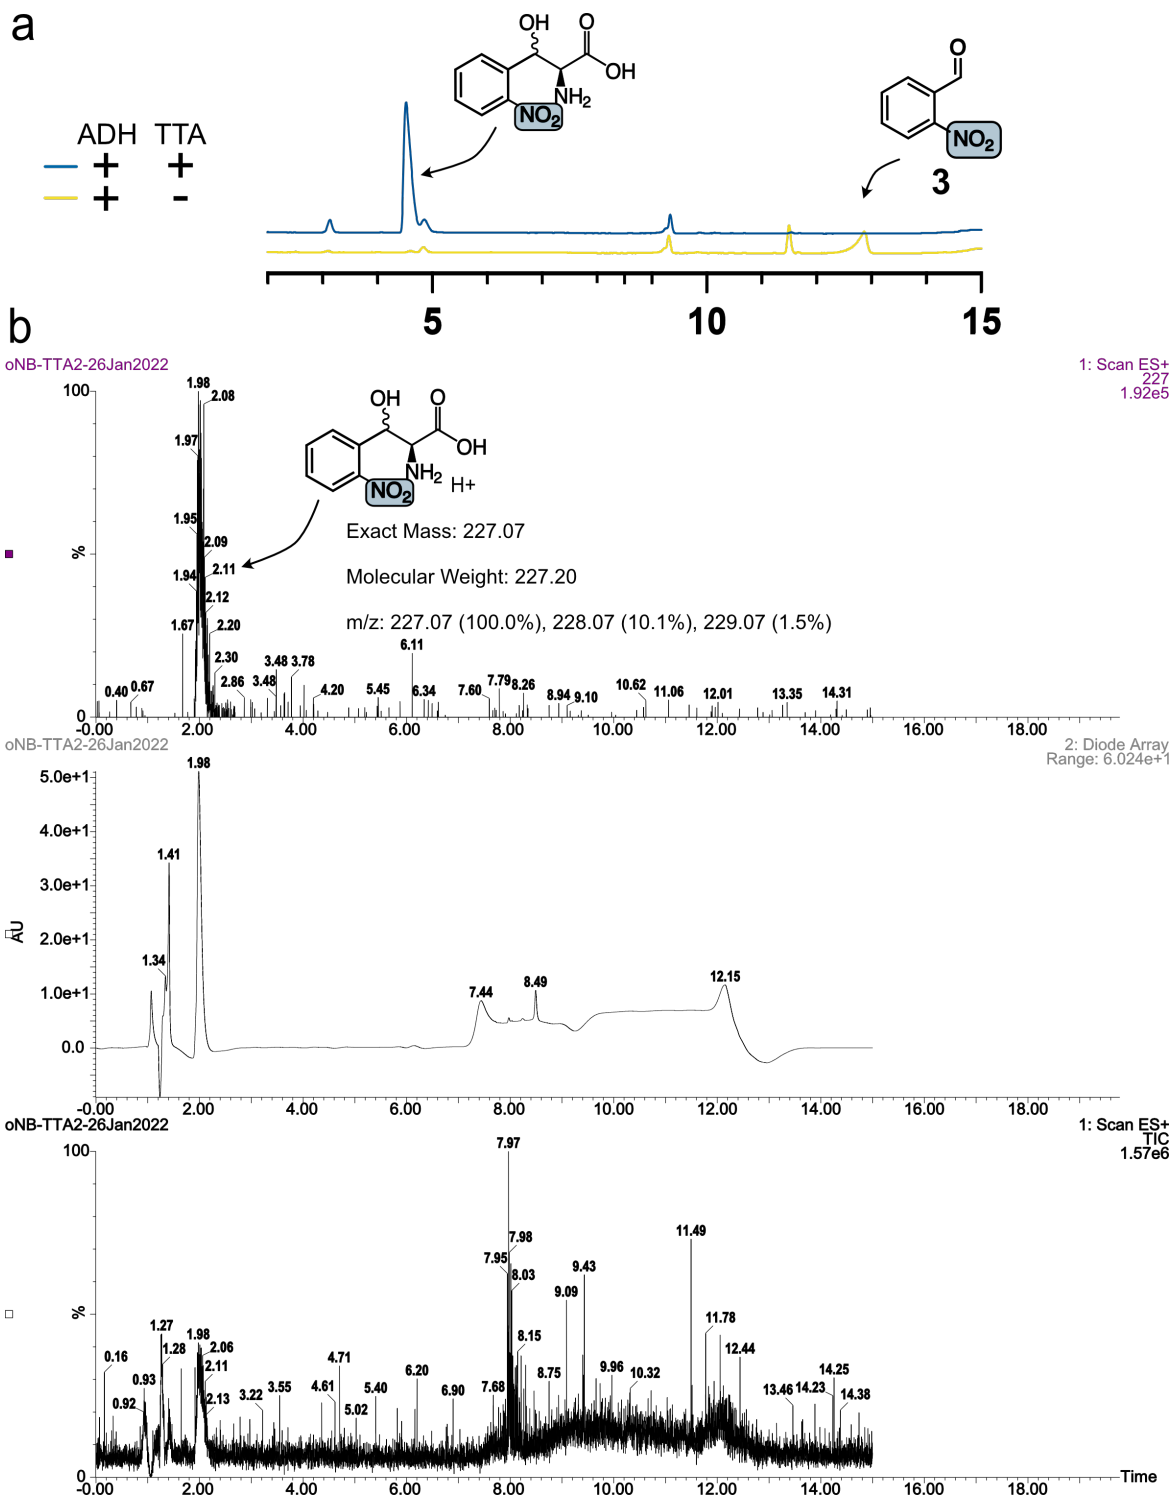

Figure S11: HPLC and LC-MS confirmation for  $\beta$ -OH-nsAA produced from 2-nitro-benzaldehyde (3). (a) HPLC traces at 280 nm for the with and without TTA conditions. (b) LC-MS trace.

Figure S12

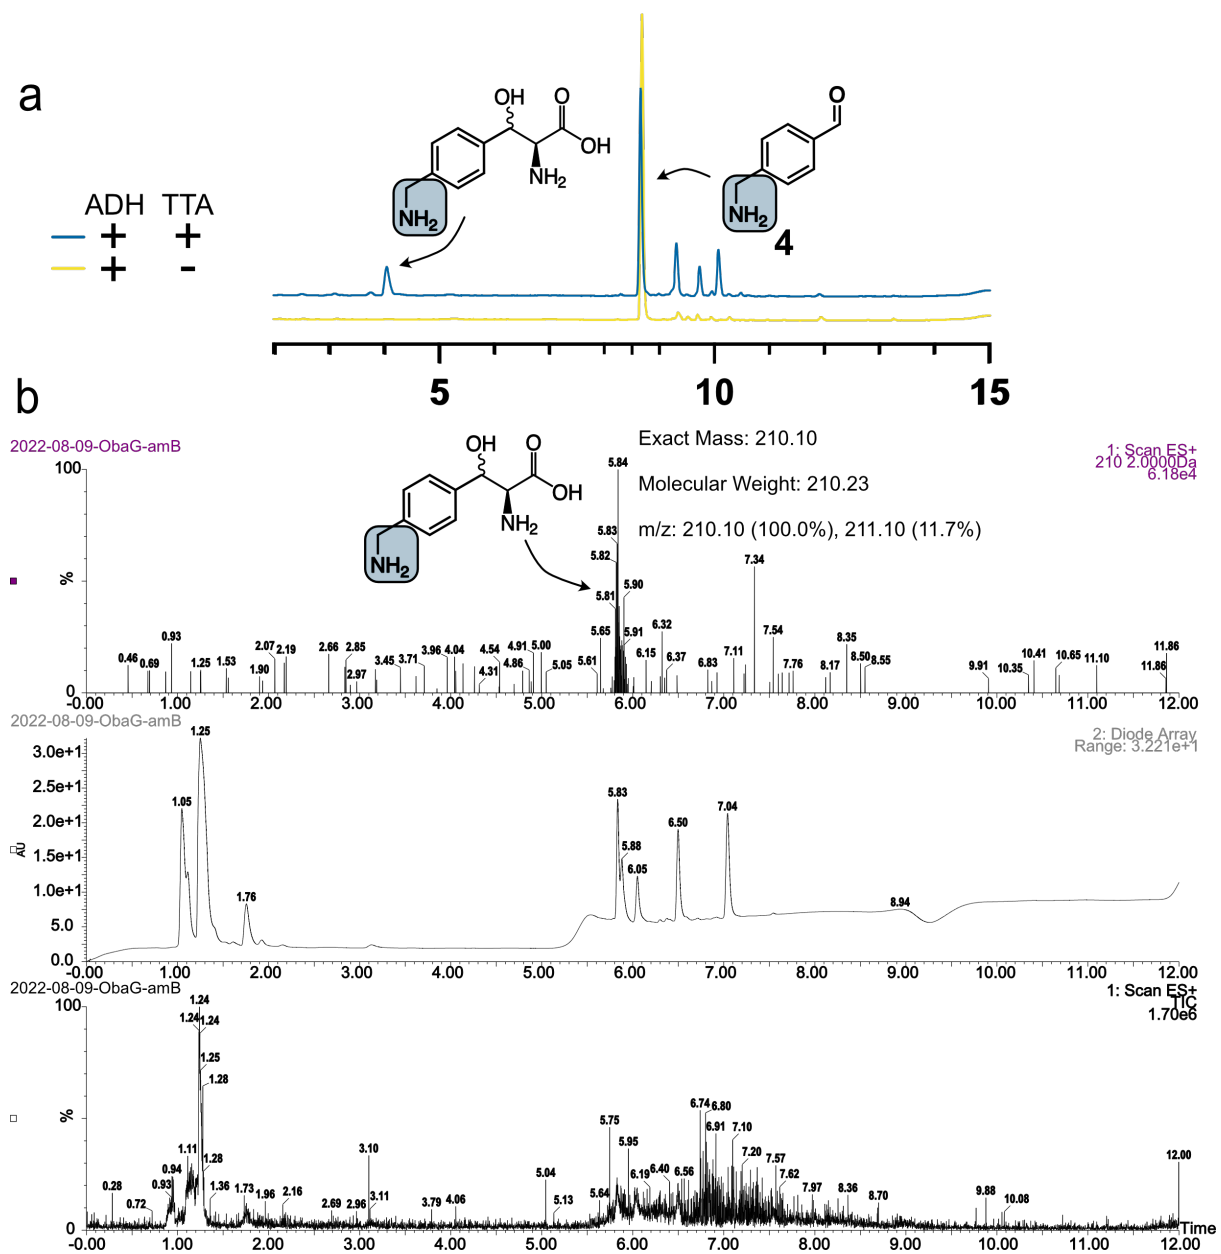

Figure S12: HPLC and LC-MS confirmation for  $\beta$ -OH-nsAA produced from 4-amino-methylbenzaldehyde (4). (a) HPLC traces at 280 nm for the with and without TTA conditions. (b) LC-MS trace.

Figure S13

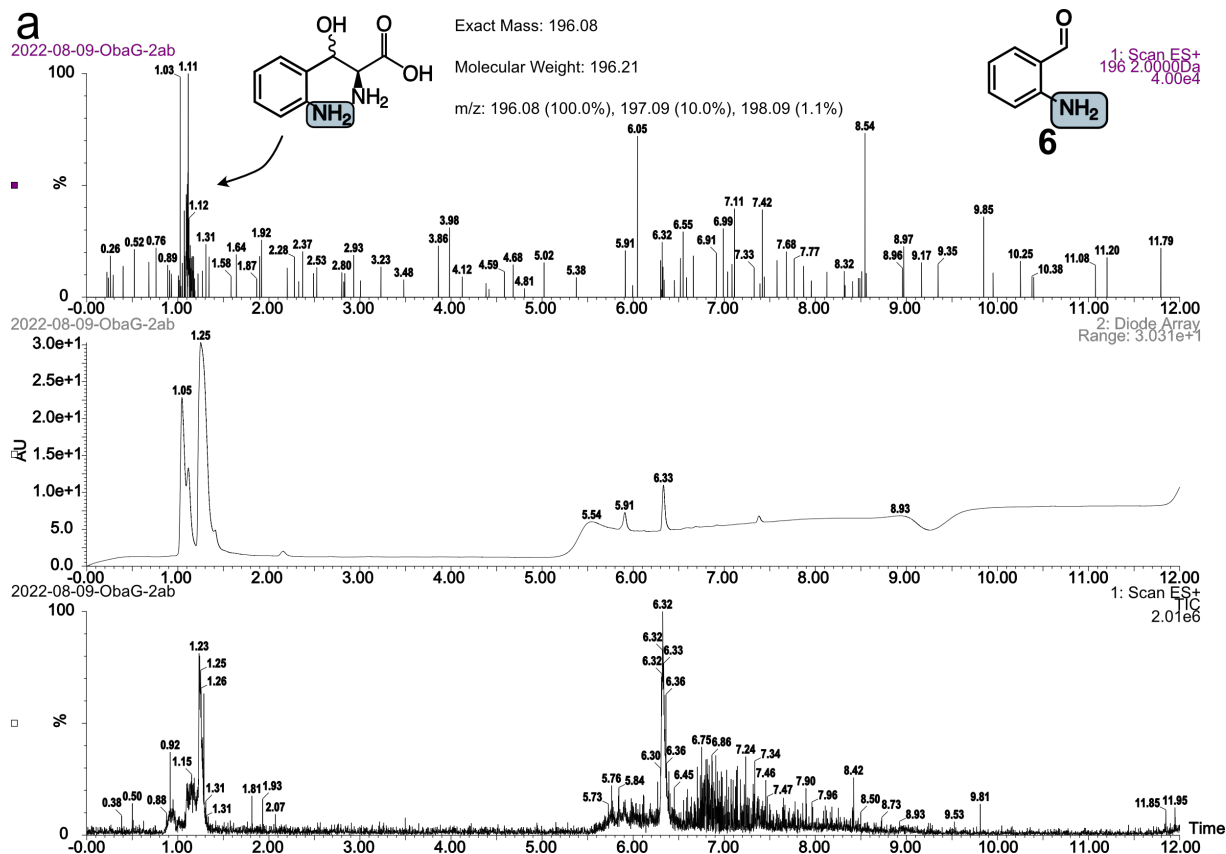

Figure S13: LC-MS confirmation for  $\beta$ -OH-nsAA produced from 2-amino-benzaldehyde (6). (a) LC-MS trace. It was difficult to detect 2-amino-benzaldehyde via HPLC due to its co-elution with the solvent front.

Figure S14

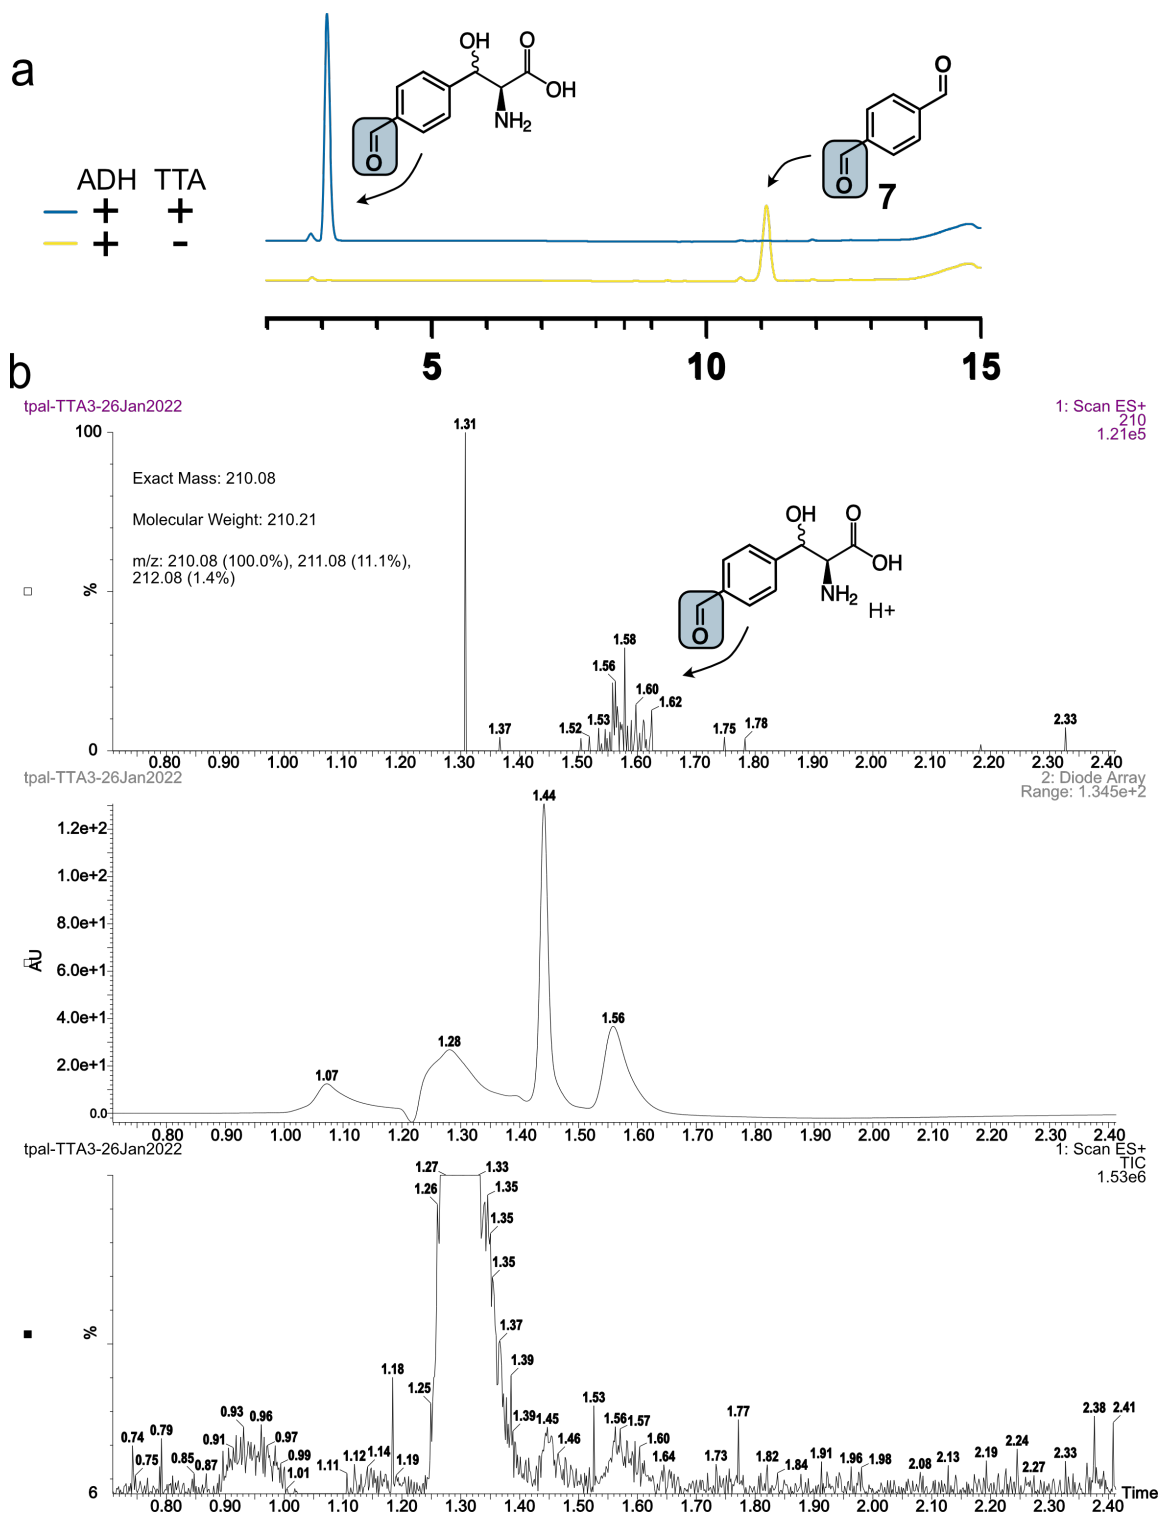

Figure S14: HPLC and LC-MS confirmation for  $\beta$ -OH-nsAA produced from terephthalaldehyde (7). (a) HPLC traces at 250 nm for the with and without TTA conditions. (b) LC-MS trace.

Figure S15

a

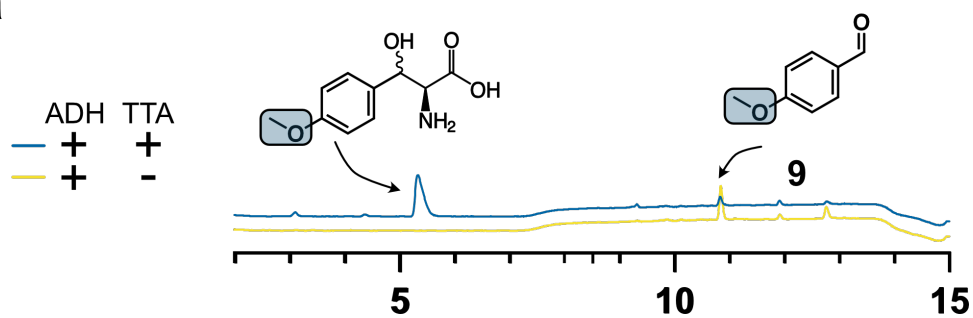

**Figure S15: HPLC confirmation for  $\beta$ -OH-nsAA produced from 4-methoxybenzaldehyde (9).** (a) HPLC traces at 210 nm for the with and without TTA conditions. Despite the robust peak formed on HPLC, we had difficulty verifying the product via LC-MS, possibly because it does not ionize well.

Figure S16

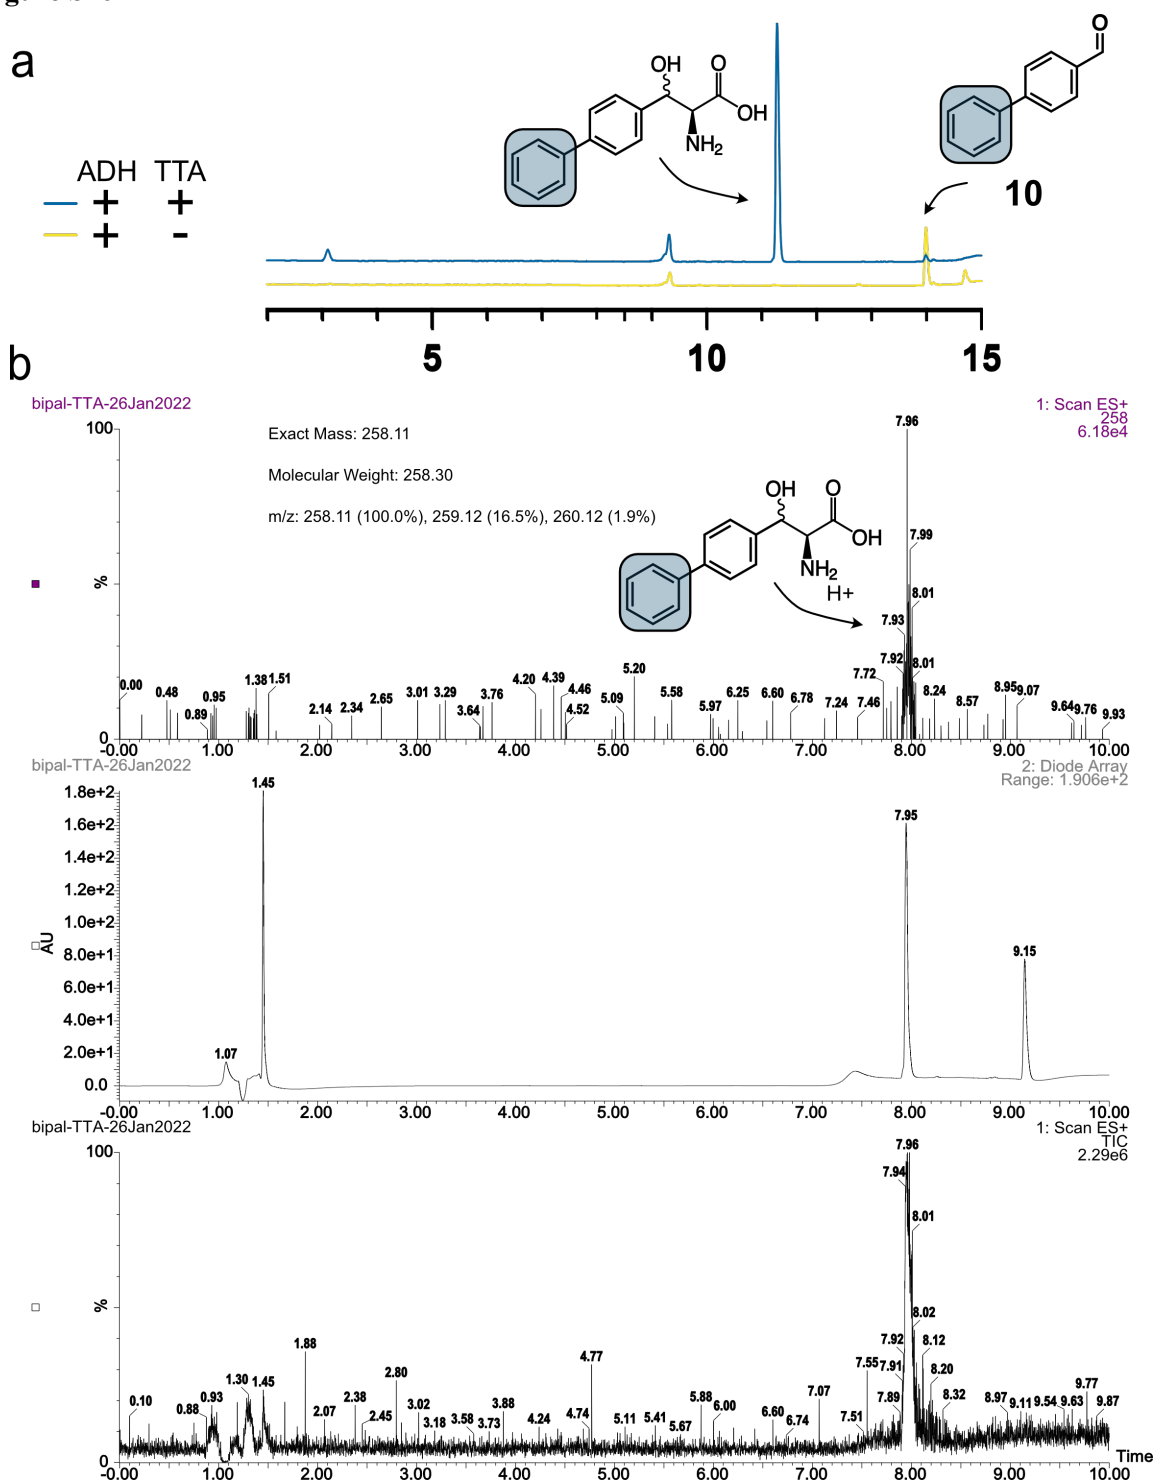

Figure S16: HPLC and LC-MS  $\beta$ -OH-nsAA produced from confirmation for 4-biphenylcarboxaldehyde (10). (a) HPLC traces at 280 nm for the with and without TTA conditions. (b) LC-MS trace.

Figure S17

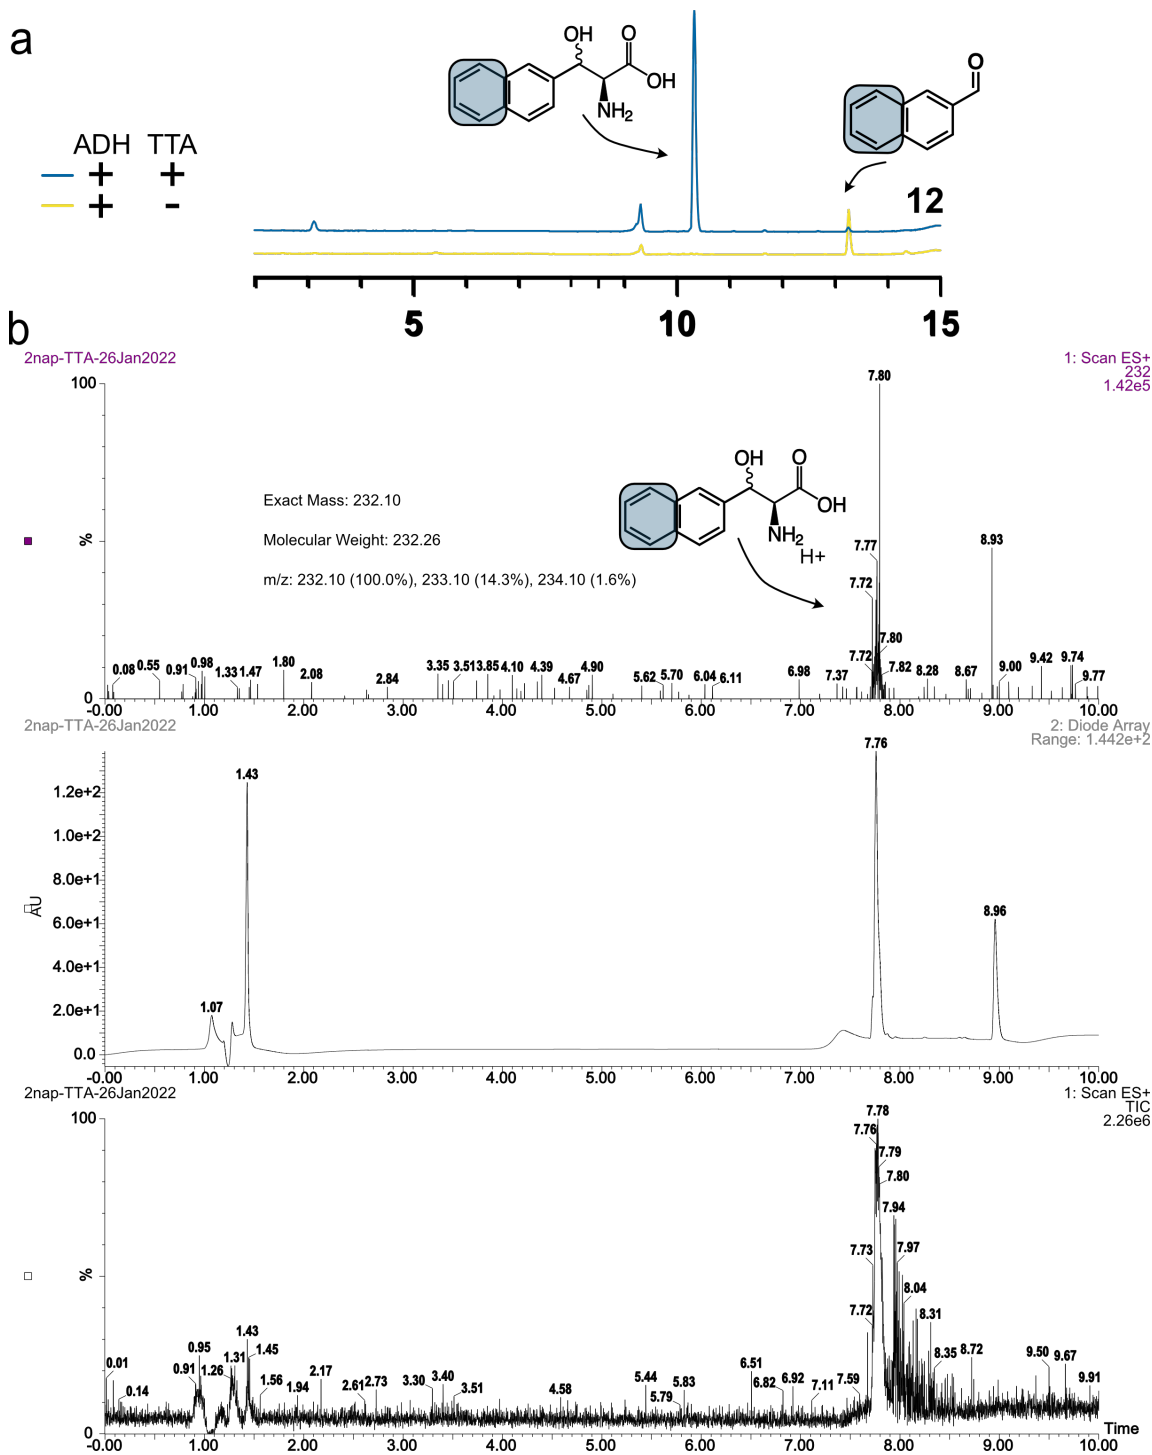

Figure S17: HPLC and LC-MS confirmation for  $\beta$ -OH-nsAA produced from 2-naphthaldehyde (11). (a) HPLC traces at 280nm for the with and without TTA conditions. (b) LC-MS trace.



Figure S18

a

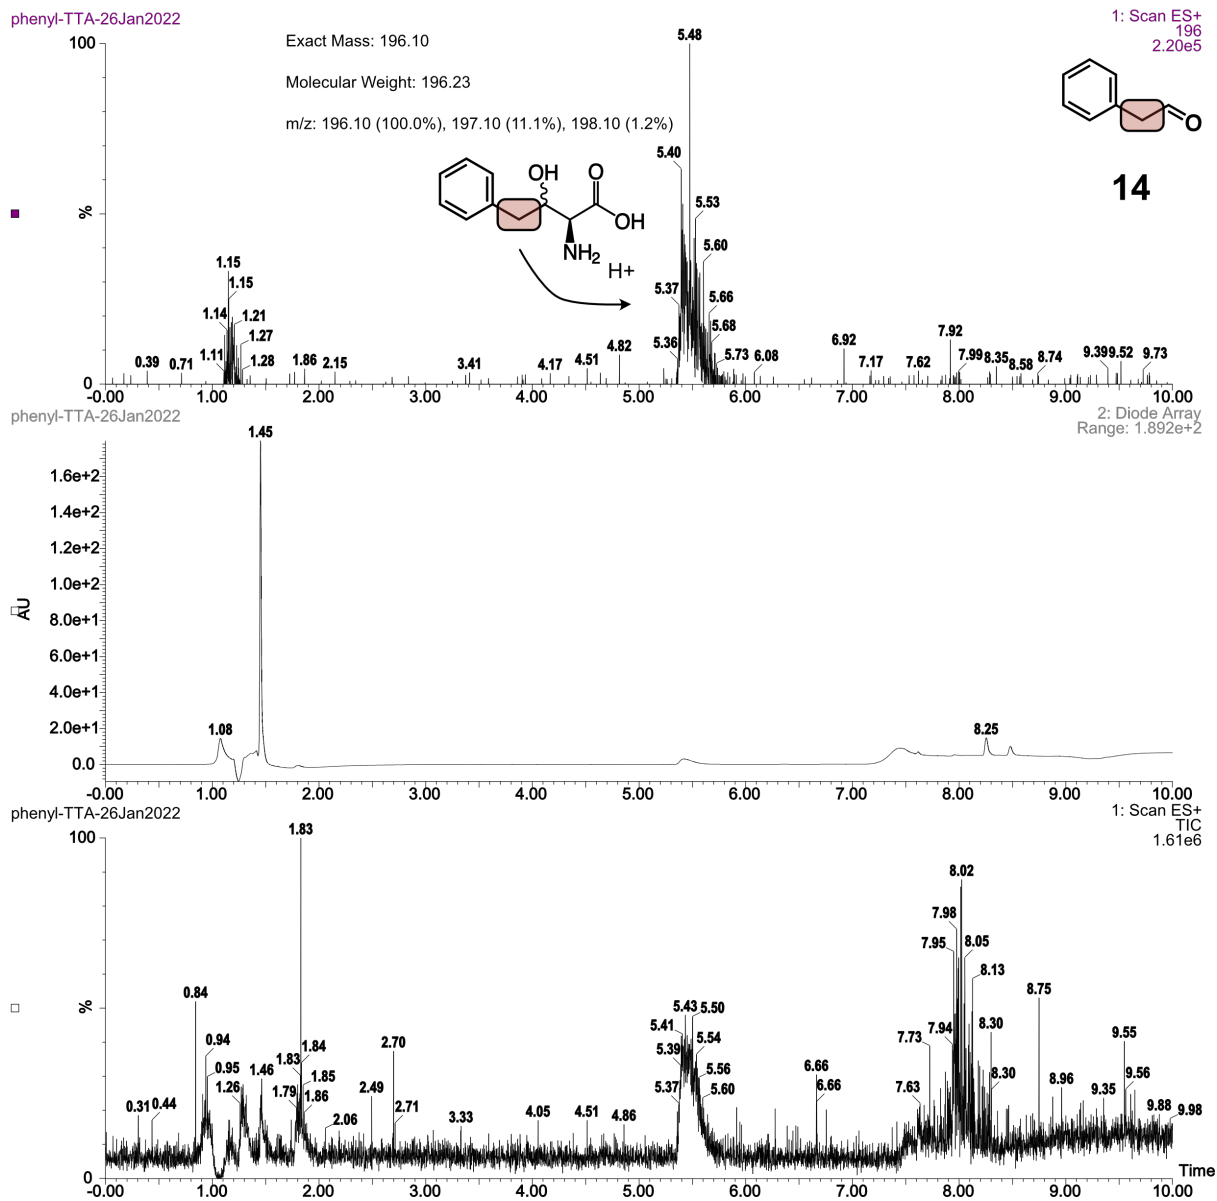

Figure S18: LC-MS confirmation for  $\beta$ -OH-nsAA produced from phenylacetaldehyde (14). (a) LC-MS trace. We were unable to detect the product via HPLC due to low absorbance across all wavelengths screened.

Figure S19

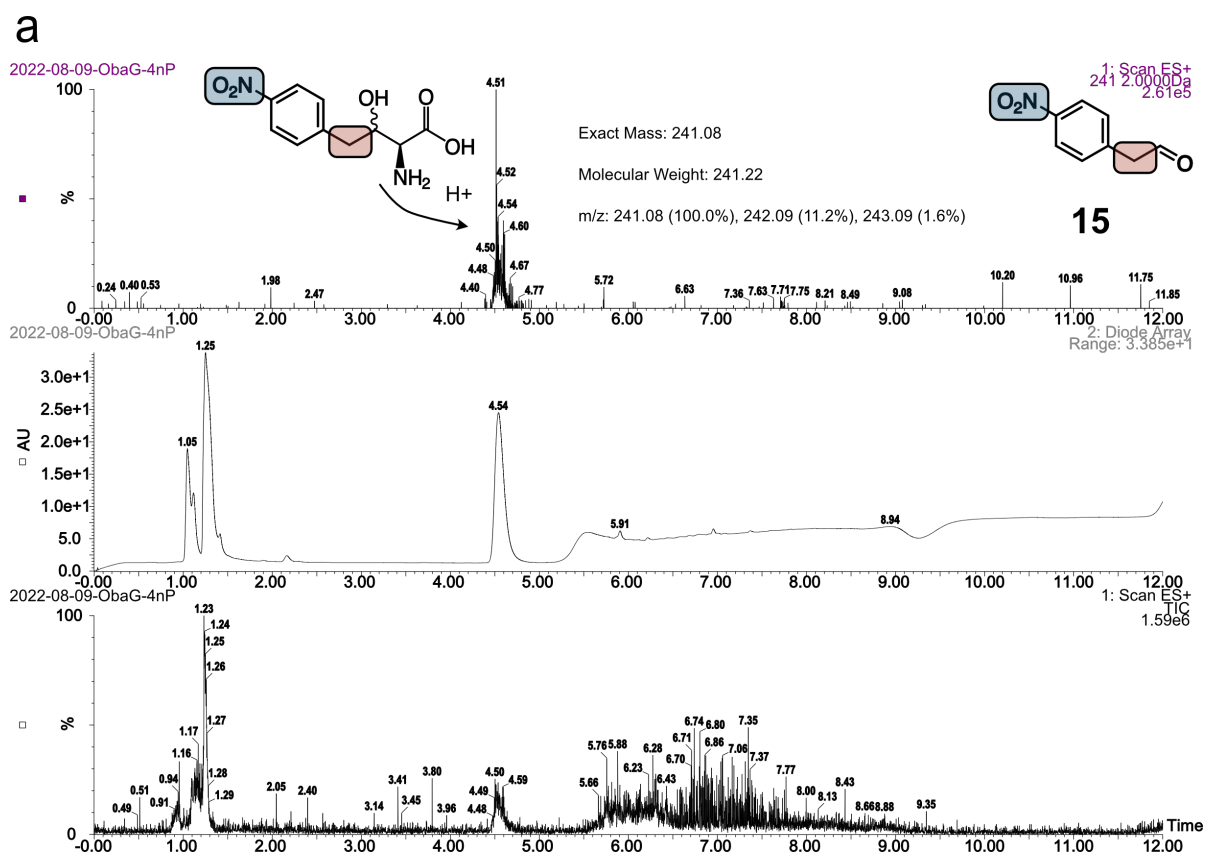

Figure S19: LC-MS confirmation for  $\beta$ -OH-nsAA produced from 4-nitro-phenylacetaldehyde (15). (a) LC-MS trace. It was difficult to observe a specific product peak on HPLC because of the instability of 4-nitro-phenylacetaldehyde.

Figure S20

a

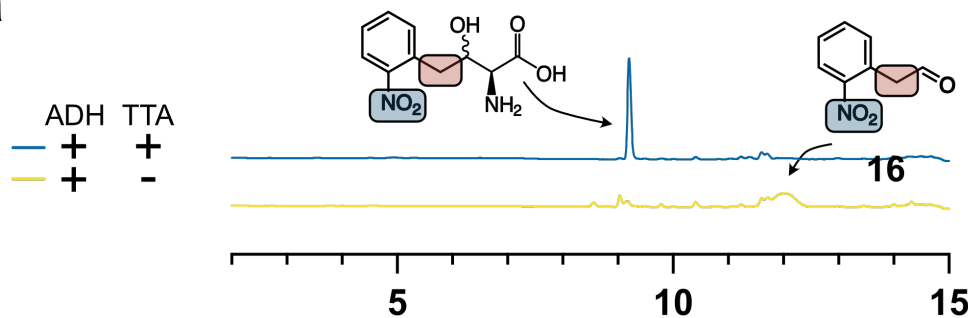

b

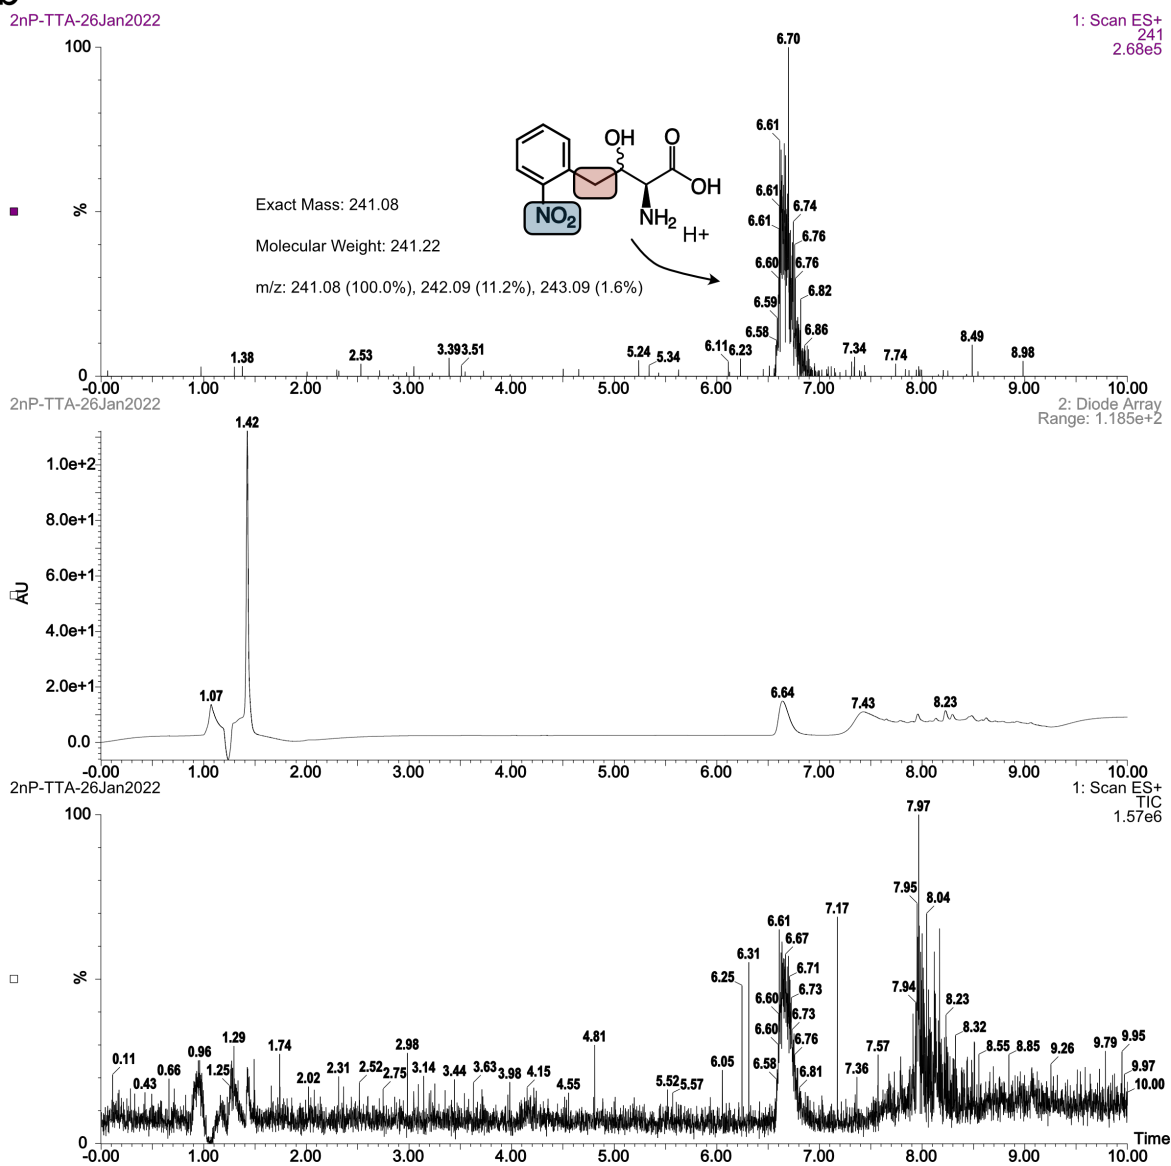

Figure S20: HPLC and LC-MS confirmation for  $\beta$ -OH-nsAA produced from 2-nitrophenylacetaldehyde (16). (a) HPLC traces at 280nm for the with and without TTA conditions. (b) LC-MS trace.





Figure S23

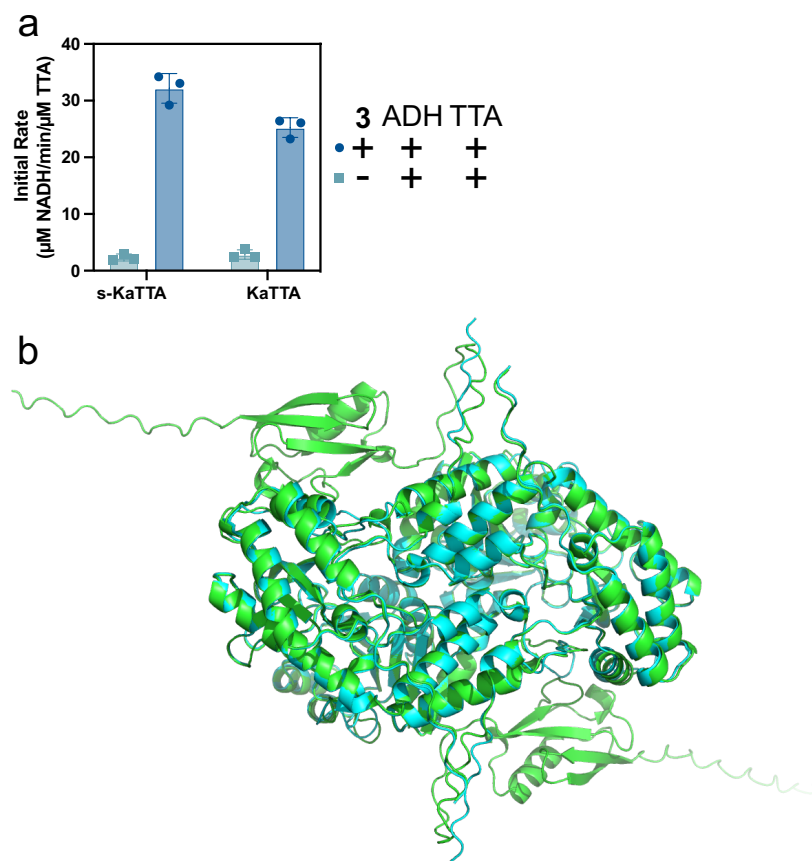

**Figure S23: SUMO versus no SUMO tag for KaTTA.** (a) Rates from the TTA-ADH coupled assay for KaTTA with and without the SUMO tag. (b) Structural overlay of KaTTA with (green) and without (blue) the SUMO-tag. Structures were generated using AlphaFold2 Colab<sup>9</sup> notebook and aligned using PyMOL.

Figure S24

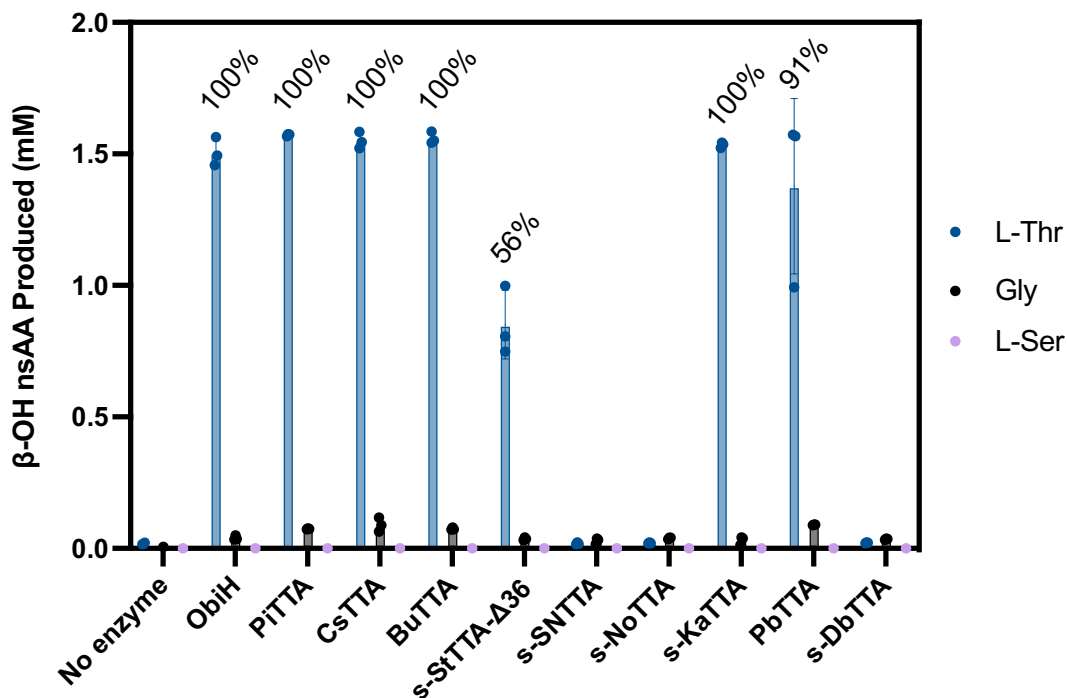

**Figure S24: L-Thr is required for  $\beta$ -OH-nsAA production with the active TTAs.** Conversion of **3** to the  $\beta$ -OH-nsAA only occurs in the presence of L-Thr for the active TTAs. We observed product formation for StTTA- $\Delta$ 36 indicating it is also active with significant  $\beta$ -OH-nsAA formation after 20 h incubation. Reaction conditions described in the SI Methods. While there appears to be some small product formation in the presence of glycine, these peaks appeared in the negative control without enzyme. We hypothesize they are from the acid-catalyzed imine formation from the unreacted aldehyde and glycine. We did not observe imine formation in the negative controls containing L-Thr and L-Ser. Assay performed in triplicate for L-Thr and Gly with all replicates represented and error bars that represent the standard deviation. Assay for L-Ser was not assayed in triplicate because there was no peak formation. The percentage above the L-Thr bars indicates the analytical percent conversion observed for that reaction.

Figure S25

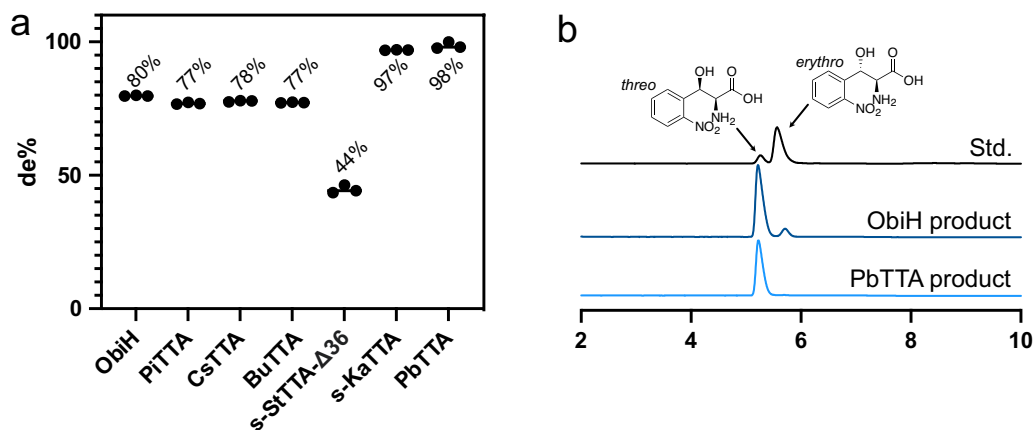

**Figure S25: de% for  $\beta$ -OH-nsAA produced from 2-nitro-benzaldehyde for all active enzymes.** (a) The de% for the *threo* isomer for each of the active enzymes with reaction conditions as specified in the main text and quenched after 20 h. de% was calculated as follows  $(threo - erythro)/(threo + erythro)$ . (b) HPLC traces for ObiH and PbTTA as well as the chemically synthesized standard to demonstrate how we identified the diastereomers.



Figure S26

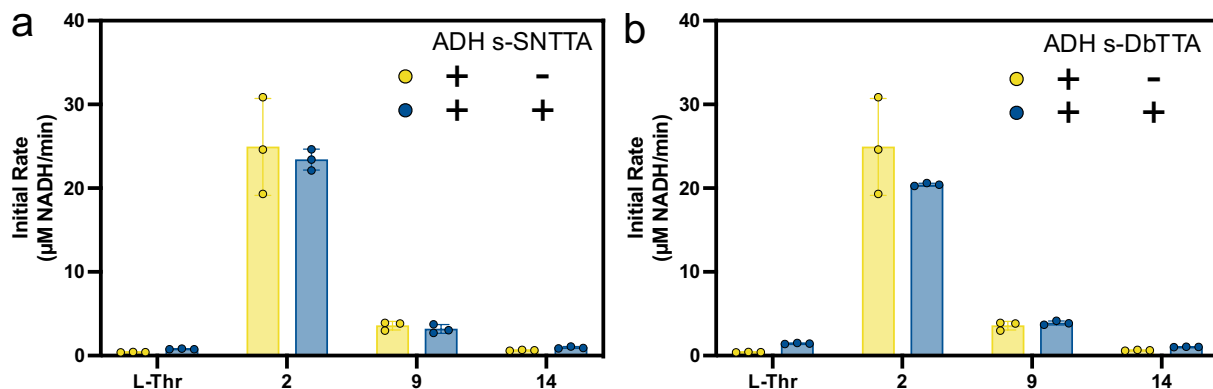

**Figure S26: Negative results for activity of SNTTA, and DbTTA with additional aldehyde substrates.** Initial rates for a series of different aldehyde substrates using L-Thr with (a) SNTTA and (b) DbTTA. The rates are approximately equal in the “no TTA” and “TTA + ADH” cases for all aldehyde substrates tested, indicating there is no activity of SNTTA or DbTTA on the aldehyde substrate.

Figure S27

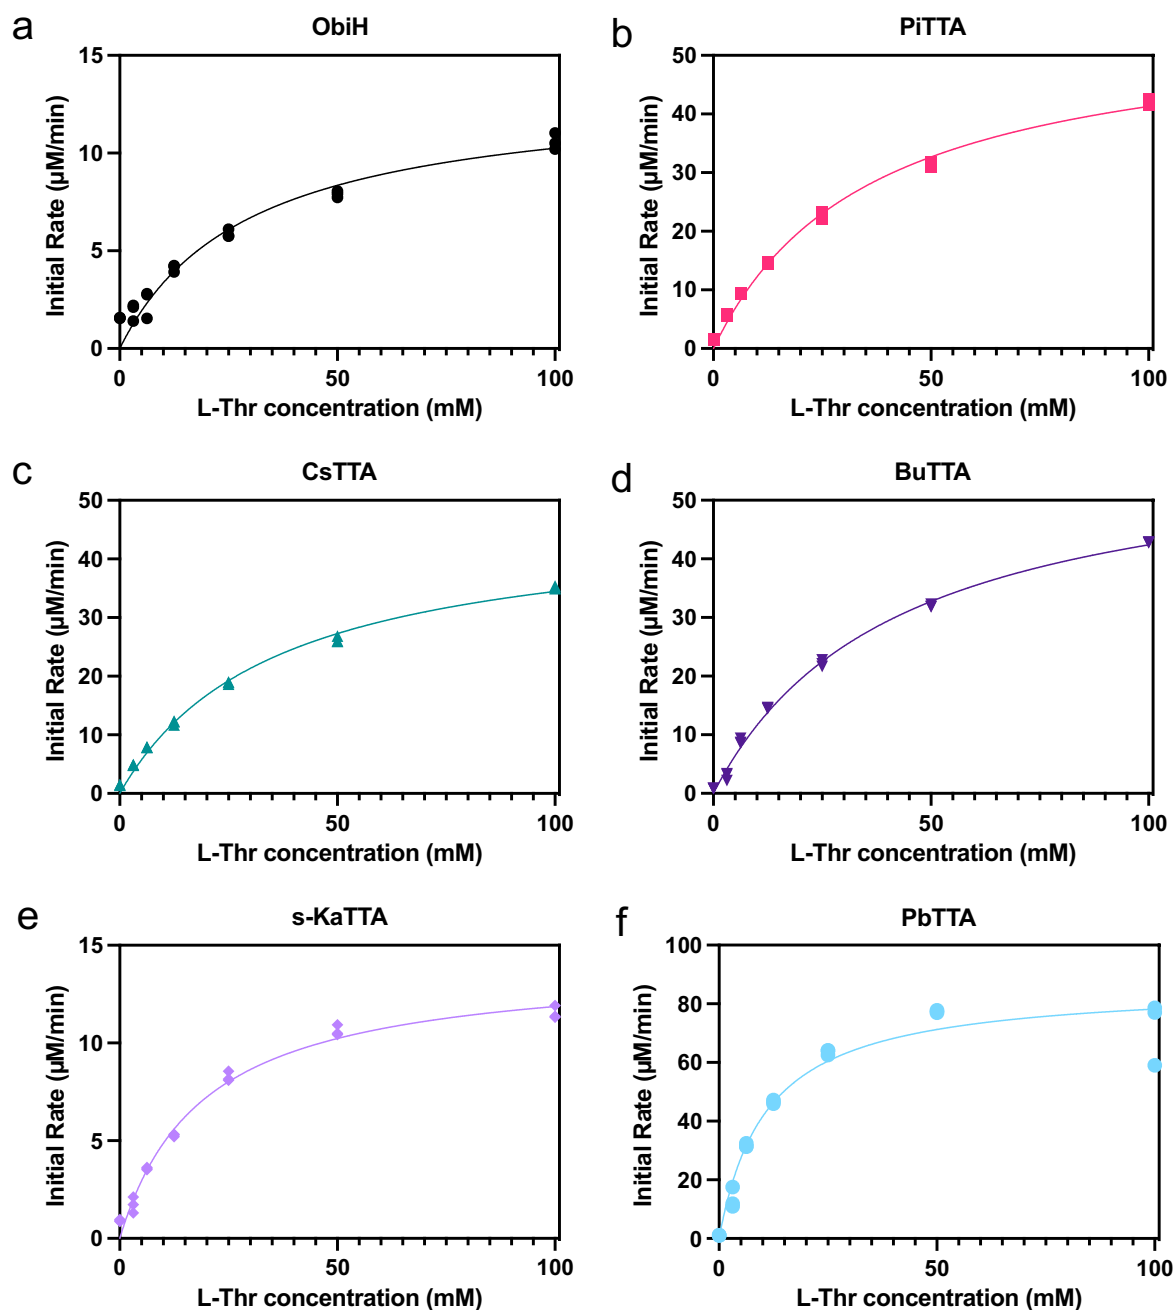

**Figure S27: Michaelis-Menten curves for  $K_M$  and  $k_{cat}$  calculations.** Initial rate versus L-Thr concentration to calculate the Michaelis-Menten parameters for each enzyme relative to L-Thr. Each reaction was performed in triplicate with each replicate displayed. The line on each graph is the result of a non-linear regression for Michaelis-Menten analysis and an asymmetric confidence interval calculation using GraphPad Prism to obtain the parameters listed in **Fig. 4b**. The standard TTA-ADH assay was performed using a non-saturating concentration of 1 mM phenylacetaldehyde. Each plot is the measurement for a different TTA with the concentration of initial enzyme listed: (a) ObiH – 0.174 μM (b) PiTTA – 0.203 μM (c) CsTTA – 0.183 μM (d) BuTTA – 0.192 μM (e) s-KaTTA – 0.178 μM (f) PbTTA – 0.200 μM.

Figure S28

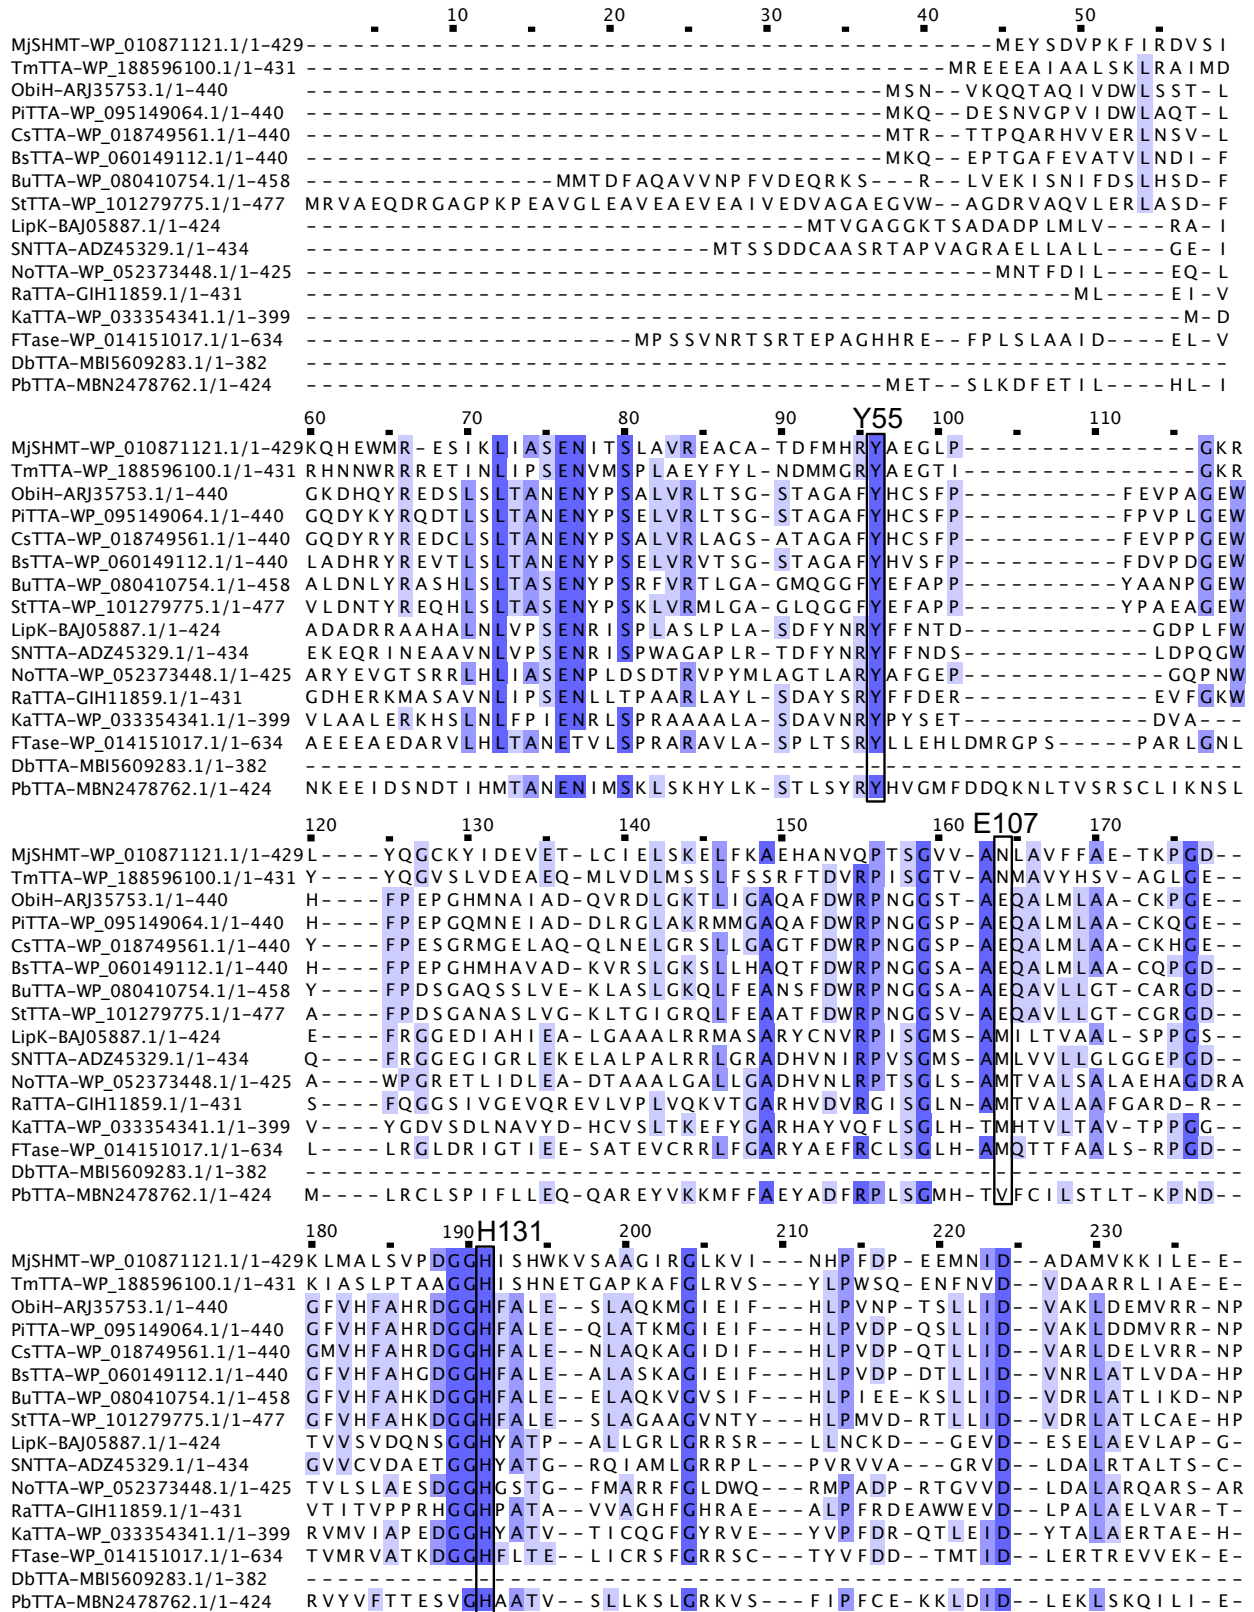

240 250 260 270 280 **D204** 290

MjSHMT-WP\_010871121.1/1-429 K P K L I L F G G S L F P --- F P H P V A D A Y E A A Q E V -- G A K I A Y D G A H V L G L I A C K Q F Q D P L R E  
TmTTA-WP\_188596100.1/1-431 R P K L V L L G A S L Y L --- F P H P I K E L A D A A E V -- G A V L M H D S A H V L G L I A G H Q F P N P L E L  
ObiH-ARJ35753.1/1-440 H I R I V I L D Q S F K L --- R W Q P L A E I R S V L --- P D S C T L T Y D M S H D G G L I M G G V F D S P L S C  
PiTTA-WP\_095149064.1/1-440 H I R I V I L D Q S F K L --- R W Q P L A E I R A I L --- P D S C T L T Y D M S H D G G L I L G G V F D S P L A C  
CsTTA-WP\_018749561.1/1-440 Q I R I V I L D Q S F K L --- R W Q P L A A I R K V L --- P P S C T L T Y D T S H D G G L I M G G V F D S P L H C  
BsTTA-WP\_060149112.1/1-440 R I R I V I L D Q S F K L --- R W Q P L R A I R D A L --- P A H C T L T Y D A S H D G G L V M G G W F D S P L R C  
BuTTA-WP\_080410754.1/1-458 H I K L V I L D Q S F K L --- R W Q P L L Q I R Q A L --- P E S V V L S Y D A S H D G G L I I G E C L P Q P L L F  
StTTA-WP\_101279775.1/1-477 E I K L V I L D Q S F K L --- R W Q P L A Q I R A A L --- P E G V F L A Y D A S H D G A L I A G G V L P Q P T L L  
LipK-BAJ05887.1/1-424 D V A L V Y V D V Q N C V --- R V P D F R R M S D V I R E V S P G T R L Y V D A S H Y L G L V L G G L L A N P L D C  
SNTTA-ADZ45329.1/1-434 H V P L V Y L D L Q N S L --- W E L D V A G V A E V I A R T S P R T V L H V D C S H T L G L I L G G S H K N P L D L  
NoTTA-WP\_052373448.1/1-425 G P L V L Y L D A F M A R --- F P F D L T G I R G A V --- G D S A L I H Y D G S H P L G L I A G G R F Q N P L A E  
RaTTA-GIH11859.1/1-431 D P A L V Y V D Q A T A L --- V P L D L A G V I R T V K E V S P G T H V H A D T S H I N A F V W S G L F G Q P L D L  
KaTTA-WP\_033354341.1/1-399 P A D V I Y L D A S T V L --- R M P D A R A L R --- A A A P G A V L C L D A S H L L G L L P A A P G T L V L D A  
FTase-WP\_014151017.1/1-634 R P S L L F V D A M N Y L --- F P F P I A E L K A I A --- G - D V P L V F D A S H T L G L I A G G R F Q D P L R E  
DbTTA-MBI5609283.1/1-382  
PbTTA-MBN2478762.1/1-424 K P N A I L F D F G T P F --- Y P L P I R E I R E I V --- G N D V K M I Y D A S H V L G L I A G G Q F Q N P L L E

300 310 **K234** 320 330 340 350

MjSHMT-WP\_010871121.1/1-429 G A E Y L --- M G S T H K T F F G P Q G - G V I L T T K E N --- A - D K I D S H V F P G V V S N H H L H H K  
TmTTA-WP\_188596100.1/1-431 G A D I M --- T S S T H K T F P G P Q G - G V I F T T R E D --- L F K E I Q R S V F P V M T S N Y H L H R Y  
ObiH-ARJ35753.1/1-440 G A D I V --- H G N T H K T I P G P Q K - G Y I G F K S A Q H P --- L L V D T S L W V C P H L Q S N C H A E Q L  
PiTTA-WP\_095149064.1/1-440 G A D I A --- H G N T H K T I P G P Q K - G F I A F K S A Q H P --- L L V E T S L W V C P H L Q S N C H A E L L  
CsTTA-WP\_018749561.1/1-440 G A D V I --- H G N T H K T I P G P Q K - G Y I A F K S A E H P --- L L V D T S L W L C P H L Q S N C H A E L L  
BsTTA-WP\_060149112.1/1-440 G A D V V --- H G N T H K T I A G P Q K - A Y V A F G S A E H P --- L L A D T S I W V C P N I Q S N C H A E Q L  
BuTTA-WP\_080410754.1/1-458 G A D I V --- H G N T H K T I P G P Q K - G Y I A F K N V D H P --- A M K H V S D W V C P H L Q S N C H A E L I  
StTTA-WP\_101279775.1/1-477 G A D A V --- H G N T H K T I A G P Q K - A Y I A F R D A E H P --- K L R A V S D W V C P Q M Q S N S H A E L I  
LipK-BAJ05887.1/1-424 G A D A F --- G G S T H K S F P G P H K - G V I F T N A E D --- V D E S L R - S A Q F D L V S S H H F A E T  
SNTTA-ADZ45329.1/1-434 G A D T T --- G G S T H K T F P G P Q K - G V L F T R D E N --- L S R K I R - D A Q F F T I S S H H F A E T  
NoTTA-WP\_052373448.1/1-425 G A D S L --- G G S V H K T W P G P V G K G I I A T N D S A --- L A S R F D - T H A A G W I S H H P A D L  
RaTTA-GIH11859.1/1-431 G A D S Y --- G G S T H K T F A G P H K - A L L L T N D D A --- V S D K L T - S V A V N L V S H H V S D V  
KaTTA-WP\_033354341.1/1-399 G F D S I --- S G S T H K T L P G P Q K - G L I L V T N S D A --- I A E Q V G - A R I P F T A S S H S A S V  
FTase-WP\_014151017.1/1-634 G A D L L --- Q A N T H K T F F G P Q K - G I I L G N D R S --- L M E E L G Y T L S T G M V S S Q H T A S T  
DbTTA-MBI5609283.1/1-382  
PbTTA-MBN2478762.1/1-424 G C D V L --- I G N T H K T F P G P Q K - G M I L Y K N K S --- L G K E I A T E I F K S A I S A Q H T H H A

360 370 380 390 400 410

MjSHMT-WP\_010871121.1/1-429 A G L A I A L A E M L E F G - E A Y A K Q V I K N A K A L A Q --- A L Y E R G F N V L C E - H K D F T E S H Q V I I  
TmTTA-WP\_188596100.1/1-431 A S T I V T A I E M S T Y G - D E Y A A T V R S N A K A L A E --- Q L H A N G L P V V A E - E H G F T A T H Q V A M  
ObiH-ARJ35753.1/1-440 P P M W V A F K E M E L F G - R D Y A A Q I V S N A K T L A R --- H L H E L G L D V T G E - S F G F T Q T H Q V H F  
PiTTA-WP\_095149064.1/1-440 P S M W A A F K E M E A F G - P A Y A H Q M V R N A K A L A N --- Q L H E L G L N V S G E - S F G F T E T H Q V H F  
CsTTA-WP\_018749561.1/1-440 P P M W V A F K E M E A F G - H D Y A P Q V A R N A K A L A G --- H L H R L G F E V S G E - A F G F T E T H Q V H F  
BsTTA-WP\_060149112.1/1-440 P S I W V A L K E I E A Y G - P A Y A S Q V V R N A T A F A R --- A L H A R G L D E V S G E - S F G F T E T H Q V H F  
BuTTA-WP\_080410754.1/1-458 A P M Y I A L V E M S L Y G - R S Y A E Q V I K N A K A L A H --- A L H A E G V R V S G E - S F G F T E T H Q V H V  
StTTA-WP\_101279775.1/1-477 A P M Y V A L S E V A L Y G - H A Y A R Q I L A N A Q A L A H --- G L H E E Q V R V S G E - S F G F T E T H Q V H V  
LipK-BAJ05887.1/1-424 L A L S L A A L E V E D R M - G D Y A R A T N D N A R R L A G --- A L A D A G F R V Y G D S A T G Y T D T H Q V W V  
SNTTA-ADZ45329.1/1-434 L A L A L A A A E F E H F G - A A Y S R Q V L I N A R A F A H --- R L R E R G F G V V E G - G P Q L T D T H Q V W V  
NoTTA-WP\_052373448.1/1-425 A A L A L S T A W M E Q H A - G D Y A T A V I A N A V Q L A D --- E L A D G G L S I C A D - D R G A T A S H Q V W V  
RaTTA-GIH11859.1/1-431 V A L A I A M V E F A E C G V D Y A Q A V L A N A A A F A R --- A L A D A G P V Q D A - G G V L A R T H Q V W Y  
KaTTA-WP\_033354341.1/1-399 G S L A I T L E L L P H R - G D Y A R Q V I A N A R E L A R --- Q L A A R G F D V A G E - A F G F T D T H Q V W V  
FTase-WP\_014151017.1/1-634 V A L L I A L H E M W Y D G - R E Y A A Q V I D N A R R L A G --- A L R D R G V P V V A E - E R G F T A N H M F F V  
DbTTA-MBI5609283.1/1-382 V A L F I A L H E A R L T G - K A F A K Q V E N A R T L A S --- R L A A L G V P V L A R S D Q G F T D N H M F F I  
PbTTA-MBN2478762.1/1-424 I A L Y V T I I E M Y I H G - K E Y A N Q I K N N H A L S Q --- A L I N E G F K I F K R - K N Q F S L S H M I A I

420 430 440 450 460 **R366** 470

MjSHMT-WP\_010871121.1/1-429 D I E S S P D I E F S A S E L A K M Y E E A N I I L N - K N L L P W D D V N N S D N P S G I R L G T Q E C T R I L G M K E  
TmTTA-WP\_188596100.1/1-431 D V S K F G --- G G G P I A K A L E D A N I I V N - K N M L P W D K S P -- V K P S G I R M C V Q E M T R M G M K  
ObiH-ARJ35753.1/1-440 A V G D L Q K --- A L D L C V N S L H A G G I R S T - N I E I P G --- K P G V H G I R L C V Q A M T R R G M K E  
PiTTA-WP\_095149064.1/1-440 A V G D L Q Q --- A L S M C V D S L H A G G I R S T - N I E I P G --- K P G M H G I R L G V Q A M T R R G M K E  
CsTTA-WP\_018749561.1/1-440 A V G D L A Q --- A L D L C M N T L H R G G I R S T - N I E I P G --- K P G I Q G I R L C V Q A M T R R G L R E  
BsTTA-WP\_060149112.1/1-440 S V G T P E A --- A L L T C R D V L H R G G I R T T - N I E L P G --- K P G V H G I R L C V Q A M T R R G M V E  
BuTTA-WP\_080410754.1/1-458 V V G S E R K --- A L E L V T G T L A L A G I R C N - N I E I P G --- A N G L F G L R L C V Q A L T R R G I K E  
StTTA-WP\_101279775.1/1-477 V T G S A A D --- A L R L S L G E L A Q A G I R T T - N I E V P G --- A N G L H G I R L G V Q A M T R R G L R E  
LipK-BAJ05887.1/1-424 E L D G V A A --- A Y A L S N R L A E G G I R V N L Q S S M P G --- M - S G V H L R L G S N E V T F E G A G P  
SNTTA-ADZ45329.1/1-434 R L P L E E S --- A D A F S A Q L A S L G I R V N V Q T E L P D --- I - P E P A L R L C V S E I T L N G G R E  
NoTTA-WP\_052373448.1/1-425 D I A P I C P --- A P V A A Q R L Y D A G I V V N - A I A I P G --- L - A E P L R L G V Q E L A T R W L D R  
RaTTA-GIH11859.1/1-431 E P A G D --- P H R I S E R L F D A G I V V N P Y N P L P S --- T - G R L G I R M C L N E A T K L G F G E  
KaTTA-WP\_033354341.1/1-399 H H P E G N T --- P H E W G R L L T A T D I R T T - T V V L P S --- T - A R S G L R L G T Q E L T R W G M K E  
FTase-WP\_014151017.1/1-634 D T R P L G S --- G P A V I Q R L V R A G V S A N - R - A V A F --- N - H L D T I R F C V Q E I T R R G Y D H  
DbTTA-MBI5609283.1/1-382 N L T G V A S --- A P H Q M E R L L R A H L V V Q R - R - G M P F --- R - N V D A L R L G V Q E V T R R G Y G P  
PbTTA-MBN2478762.1/1-424 T G D F P I D --- H H V A C A D L H N S N I S T N - S - R I L --- Y - D F P A V R I G V Q E V T R K G M K E

480                    490                    500                    510                    520                    530  
 MjSHMT-WP\_01087112.1/1-429 K E M E E I A E F M K R I A I D K E - K P E K V R E D V K E F A K E Y S T I - - H Y S F D E G D G F K Y L R F Y - - - -  
 TmTTA-WP\_188596100.1/1-431 G E M A A V A E L I A K V V I K G V - E P S K V K P E V V E L R R G F T K V - - R Y G F D L S T L G L N C P C L P L L -  
 ObiH-ARJ35753.1/1-440 K D F E V V A R F I A D L Y F K K T - E P A K V A Q Q I K E F L Q A F P L A P L A Y S F D N Y L D E E L L A A V Y Q G A  
 PiTTA-WP\_095149064.1/1-440 D D F R R V A G L I A D L Y F K R T - E P A R V A S K V K E L L G D F P L A P L A Y S F D Q Q I D E S R R R L L E R G I  
 CsTTA-WP\_018749561.1/1-440 D D F E Q V A R F I A D L H F R K A - D P A G V A A Q V A E F L R A F P L A P L H Y S F D Q E L D H E L L Q S L I G E A  
 BsTTA-WP\_060149112.1/1-440 R D F E T V A D F I A A L C T R K R - T P E D V A P D V E T F L G D F P L S P L A F S F D G G M T D A L R A A L R Q G V  
 BuTTA-WP\_080410754.1/1-458 H G M A E V A R F L V R L I L K N E - S P T A I R N E I A S F L E S Y P I N T L H Y S L D A H Y Y T P S G I K L M E E V  
 StTTA-WP\_101279775.1/1-477 P Q M R E V A R L V A K V V L R R A - E P A A V R A E V A D L L Q H H P L D Q L A Y S F D S Y V D S P A A A R L L G E V  
 LipK-BAJ05887.1/1-424 Q A I E E L A G A L V T A R E R A L - G - - - P R T V H E I - R G R F G A - - P F Y T D P E K L K V E A G L - - - -  
 SNTTA-ADZ45329.1/1-434 P A M E T L A E I F A L V R A G E A - T K - - A V D L F Q V L - P H E M G E - - P Y F F T G L P Q E A G L F H G - - - -  
 NoTTA-WP\_052373448.1/1-425 D G M T V L T W V L T Q L L V H N A - A T A V V A P Q M E A L R T G L T L P E D R H G L E G F L R A C D P Q E V S V A P  
 RaTTA-GIH11859.1/1-431 P E M A E L A G L L H G V A V D R I - A V A E A G E R V A A M - R Q A A R P - - A Y C F S E D V V A S K L R E L T G A -  
 KaTTA-WP\_033354341.1/1-399 D D M T T V A E L L A R L L L R G E - Q S R S V A A D V R D L A R S F P G V - - A F A D R P A P L A V A - - - - -  
 FTase-WP\_014151017.1/1-634 D D L D E A A D L V A A V L L E R Q - E P E R I R P R V A E L V G R R R T V - - R Y T G D P A S A A G P P A R E R Y A P  
 DbTTA-MBI5609283.1/1-382 G E M A Q L A E W I A S I V I G G A - D P E V V A P A V Q A M A K R F D T I - - Y Y T G E T V D G K L D L - - - - -  
 PbTTA-MBN2478762.1/1-424 K D M V Q L A K F F K E I I L D R K - - - - N I S S K I K E F N N K F N S I - - E Y S L D E I Y E K L F - - - - -

540                    550                    560                    570                    580                    590  
 MjSHMT-WP\_01087112.1/1-429 - - - - -  
 TmTTA-WP\_188596100.1/1-431 - - - - -  
 ObiH-ARJ35753.1/1-440 Q R - - - - -  
 PiTTA-WP\_095149064.1/1-440 Q R - - - - -  
 CsTTA-WP\_018749561.1/1-440 L R - - - - -  
 BsTTA-WP\_060149112.1/1-440 M R - - - - -  
 BuTTA-WP\_080410754.1/1-458 I A - - - - -  
 StTTA-WP\_101279775.1/1-477 F R - - - - -  
 LipK-BAJ05887.1/1-424 - - - - -  
 SNTTA-ADZ45329.1/1-434 - - - - -  
 NoTTA-WP\_052373448.1/1-425 - - - - -  
 RaTTA-GIH11859.1/1-431 - - S G A G V D E L A A W L Y R - - - - -  
 KaTTA-WP\_033354341.1/1-399 - - - - -  
 FTase-WP\_014151017.1/1-634 P T A P A G H P A R P R W I G V R L T P L P E P V T E A E C A G A Q R L G R L A G A F P H Q I D S S G N V S F T S T D G  
 DbTTA-MBI5609283.1/1-382 - P E I A A P S A K G R W V D Y R H L G N D F A M D D T E F S E I R A L G A A A G A F P N Q T D S T G N V S L R S - G A  
 PbTTA-MBN2478762.1/1-424 - - - - -

600                    610                    620                    630                    640                    650  
 MjSHMT-WP\_01087112.1/1-429 - - - - -  
 TmTTA-WP\_188596100.1/1-431 - - - - -  
 ObiH-ARJ35753.1/1-440 - - - - -  
 PiTTA-WP\_095149064.1/1-440 - - - - -  
 CsTTA-WP\_018749561.1/1-440 - - - - -  
 BsTTA-WP\_060149112.1/1-440 - - - - -  
 BuTTA-WP\_080410754.1/1-458 - - - - -  
 StTTA-WP\_101279775.1/1-477 - - - - -  
 LipK-BAJ05887.1/1-424 - - - - -  
 SNTTA-ADZ45329.1/1-434 - - - - -  
 NoTTA-WP\_052373448.1/1-425 - - - - -  
 RaTTA-GIH11859.1/1-431 - - - - -  
 KaTTA-WP\_033354341.1/1-399 - - - - -  
 FTase-WP\_014151017.1/1-634 R L F V T G S G T Y I K D L A P G D F V E L T G A - - E G W T L H C R G D G P P S A E A Y L H H L L R E R V G A R Y V V  
 DbTTA-MBI5609283.1/1-382 R V F V S S G S Y I K H L A D G Q V V E L D A V D P S G E L I D Y H G A A L P S S E S L M H F L V Y Q N V P A G A V V  
 PbTTA-MBN2478762.1/1-424 - - - - -

660                    670                    680                    690                    700                    710  
 MjSHMT-WP\_01087112.1/1-429 - - - - -  
 TmTTA-WP\_188596100.1/1-431 - - - - -  
 ObiH-ARJ35753.1/1-440 - - - - -  
 PiTTA-WP\_095149064.1/1-440 - - - - -  
 CsTTA-WP\_018749561.1/1-440 - - - - -  
 BsTTA-WP\_060149112.1/1-440 - - - - -  
 BuTTA-WP\_080410754.1/1-458 - - - - -  
 StTTA-WP\_101279775.1/1-477 - - - - -  
 LipK-BAJ05887.1/1-424 - - - - -  
 SNTTA-ADZ45329.1/1-434 - - - - -  
 NoTTA-WP\_052373448.1/1-425 - - - - -  
 RaTTA-GIH11859.1/1-431 - - - - -  
 KaTTA-WP\_033354341.1/1-399 - - - - -  
 FTase-WP\_014151017.1/1-634 H N H C I P G R - A L E T S G A L V I P P K E Y G S V A L A E A V A D A C Q D S Q V M Y V R R H G L V F W A H S Y D E C  
 DbTTA-MBI5609283.1/1-382 H T H Y L L T N Q E A A D F D V A V I A P Q E Y A S I A L A R A V A E A S K R S R I V Y I Q K H G L V F W G T D T A D C  
 PbTTA-MBN2478762.1/1-424 - - - - -

|                            |                                               |     |   |     |   |     |
|----------------------------|-----------------------------------------------|-----|---|-----|---|-----|
|                            |                                               | 720 |   | 730 |   | 740 |
| MjSHMT-WP_01087112.1/1-429 | -----                                         | ■   | ■ | ■   | ■ | ■   |
| TmTTA-WP_188596100.1/1-431 | -----                                         |     |   |     |   |     |
| ObiH-ARJ35753.1/1-440      | -----                                         |     |   |     |   |     |
| PiTTA-WP_095149064.1/1-440 | -----                                         |     |   |     |   |     |
| CsTTA-WP_018749561.1/1-440 | -----                                         |     |   |     |   |     |
| BsTTA-WP_060149112.1/1-440 | -----                                         |     |   |     |   |     |
| BuTTA-WP_080410754.1/1-458 | -----                                         |     |   |     |   |     |
| StTTA-WP_101279775.1/1-477 | -----                                         |     |   |     |   |     |
| LipK-BAJ05887.1/1-424      | -----                                         |     |   |     |   |     |
| SNTTA-ADZ45329.1/1-434     | -----                                         |     |   |     |   |     |
| NoTTA-WP_052373448.1/1-425 | -----                                         |     |   |     |   |     |
| RaTTA-GIH11859.1/1-431     | -----                                         |     |   |     |   |     |
| KaTTA-WP_033354341.1/1-399 | -----                                         |     |   |     |   |     |
| FTase-WP_014151017.1/1-634 | L A L I E D V R R I T G                       |     |   |     |   |     |
| DbTTA-MBI5609283.1/1-382   | L S Q V H N F I H N R P N R R A A E A V Y A S |     |   |     |   |     |
| PbTTA-MBN2478762.1/1-424   | -----                                         |     |   |     |   |     |

**Figure S28: Multiple Sequence Alignment.** Clustal Omega alignment of representative PLP-dependent enzymes (LipK, FTase, and MjSHMT) and all TTAs in this study colored by % identity. Visualized and aligned using JalView. The residues reported to be important for catalysis and stabilization are highlighted with a black box and the labeled ObiH residue is labeled at the top of the black box.

**Figure S29**

|                       | <b>ObiH</b> | Y55    | E107   | H131   | D204   | K234   | R366   |
|-----------------------|-------------|--------|--------|--------|--------|--------|--------|
| Cluster<br>containing | ObiH        | 93% Y  | 93% E  | 93% H  | 96% D  | 89% K  | 93% R  |
|                       | LipK        | 100% Y | 88% M  | 100% H | 100% D | 100% K | 97% R  |
|                       | FTase       | 94% Y  | 88% M  | 88% H  | 94% D  | 88% K  | 100% R |
|                       | KaTTA       | 100% Y | 100% M | 100% H | 100% D | 100% K | 100% R |
|                       | PbTTA       | 100% Y | 40% T  | 100% H | 100% D | 100% K | 100% R |
|                       | SHMT        | 100% Y | 90% N  | 100% H | 100% D | 100% K | 100% R |

**Figure S29: Conservation of catalytic and stabilizing residues by cluster.** Alignment and identity calculated using JalView via the Clustal Omega alignment web service.

Figure S30

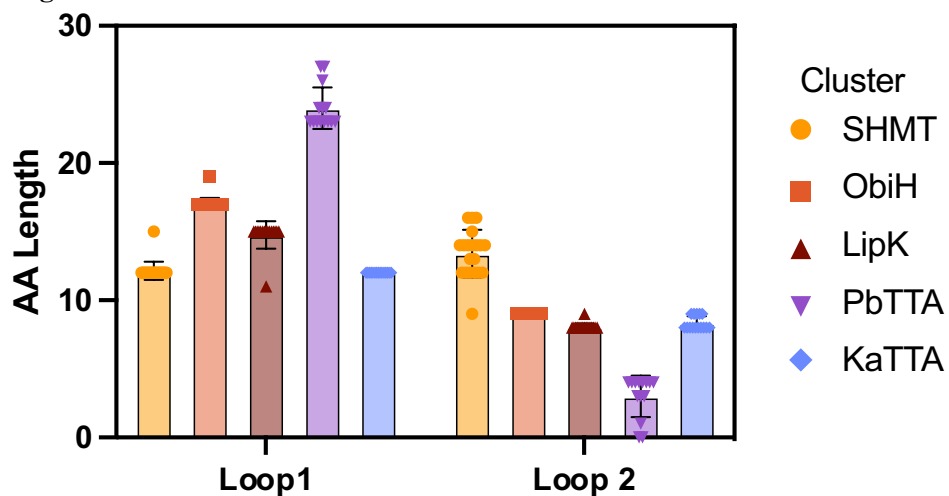

**Figure S30: Loop length analysis.** The average length for loop 1 (ObiH: Tyr55-Pro71) and loop 2 (ObiH: Glu355-His363) for several clusters. For ObiH, PbTTA, and KaTTA, analysis contains the lengths for every protein in the cluster. For SHMT and LipK, the values are for 25 randomly selected proteins within those clusters. The lengths were defined relative to alignment with ObiH.



Figure S31

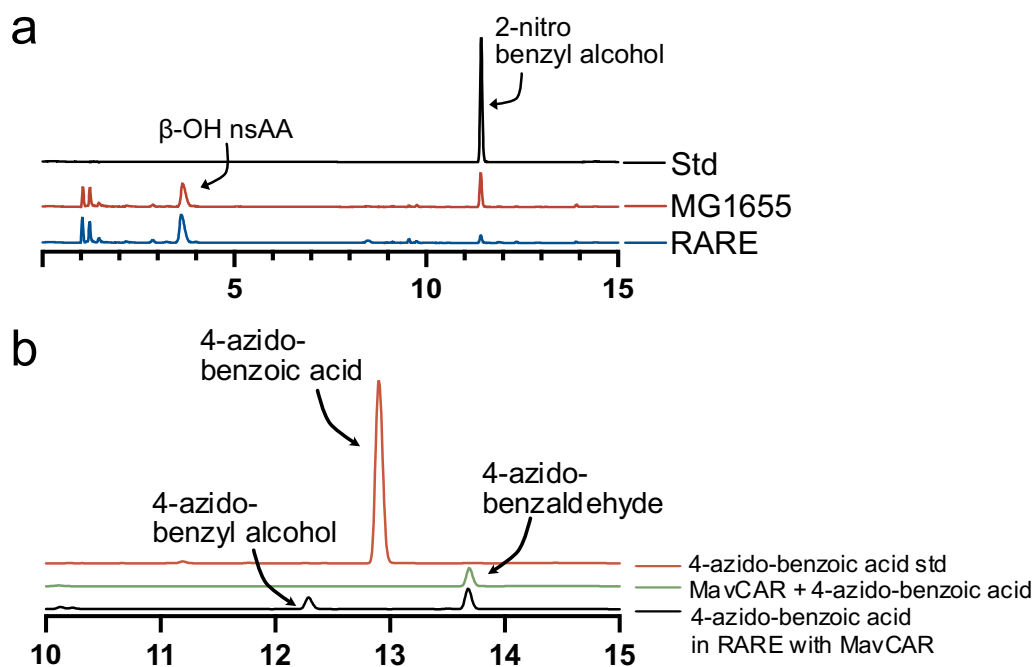

**Figure S31: Demonstration of the aldehyde stabilizing effects of the *E. coli* RARE strain for relevant candidate substrates using HPLC.** (a) HPLC trace from the production of  $\beta$ -OH-nsAA from **3** with an observed alcohol peak with a retention time at 11 minutes. The samples were collected after 20 h. We observe a smaller alcohol peak in RARE demonstrating some stabilization of the aldehyde group. (b) HPLC trace from the production of 4-azido-benzaldehyde from 4-azido benzoic acid in RARE indicating formation of both an aldehyde peak and a predicted alcohol by-product. MavCAR and 4-azido-benzoic acid is from an in vitro reaction as described in **Fig. 6a** and serves as a standard for the aldehyde since we were unable to purchase an aldehyde standard.

Figure S32

a

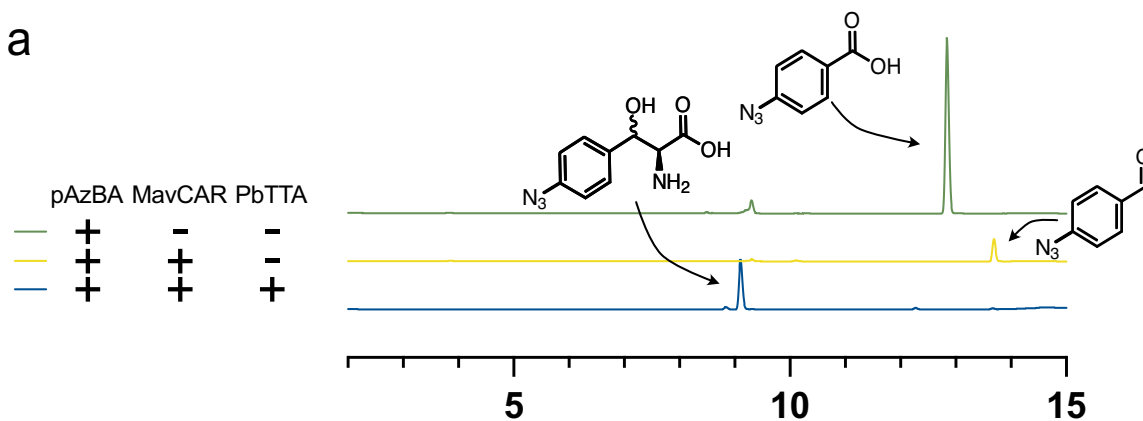

Figure S32: HPLC confirmation for  $\beta$ -OH-nsAA production from 4-azido-benzaldehyde. HPLC traces for acid, aldehyde and  $\beta$ -OH-nsAA product from an in vitro CAR-TTA reaction.

**Figure S33**

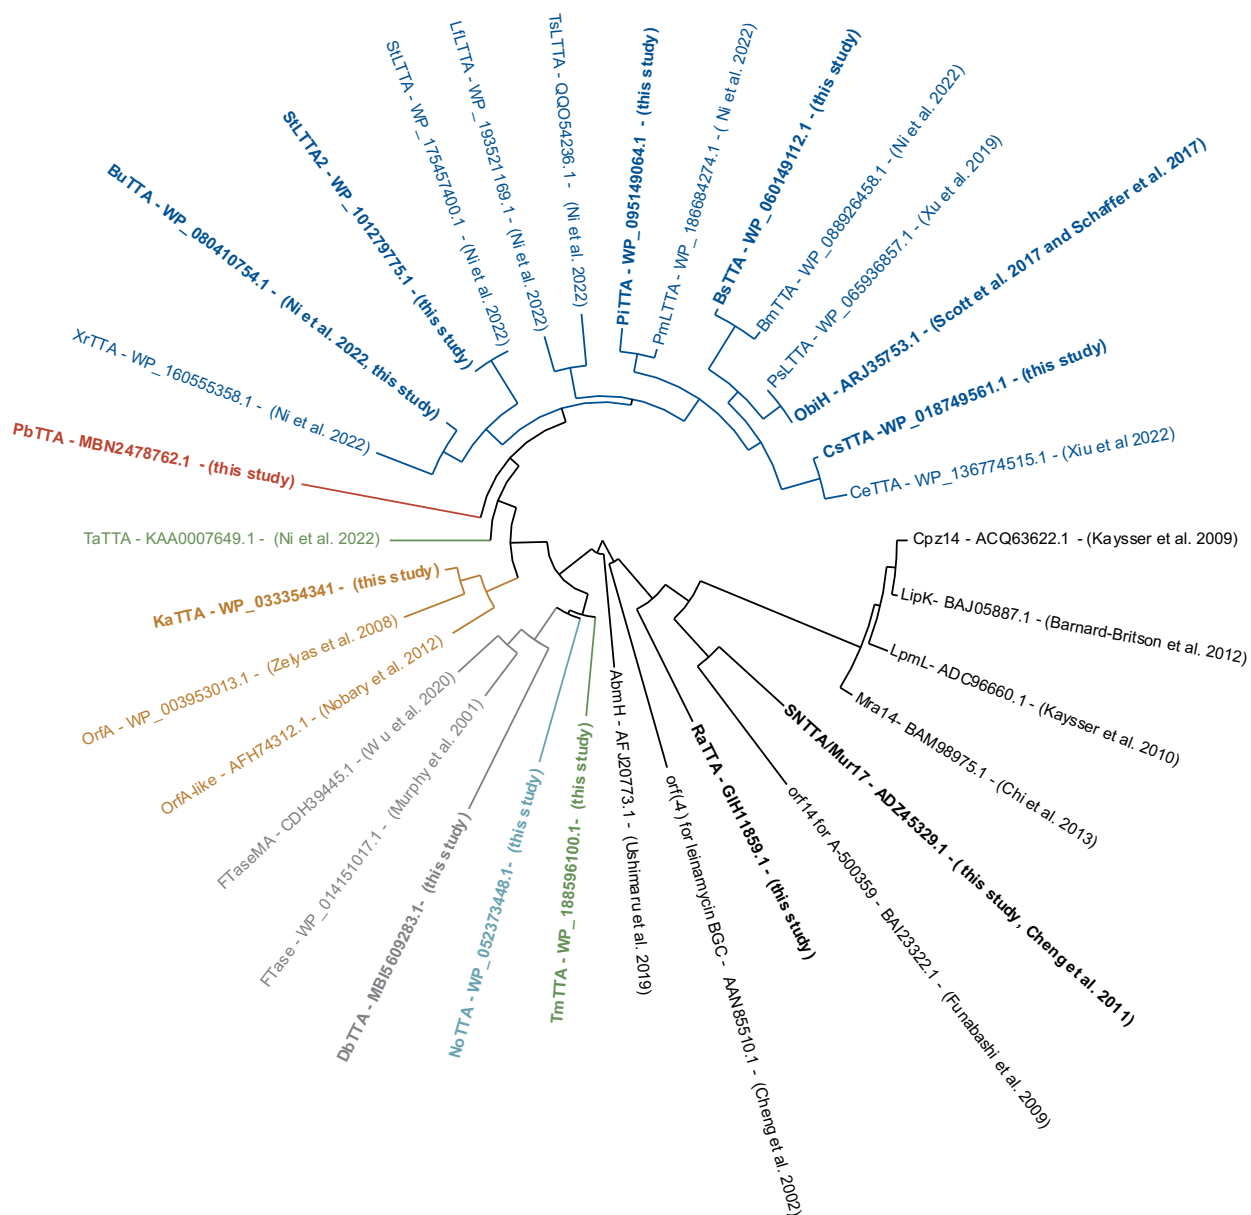

**Figure S33: Phylogenetic tree for all published TTAs.** Clusters are identified by color: blue is ObiH; red is PbTTA; green is SHMTs; orange is KaTTA; gray is the FTase; teal is NoTTA; black is LipK.<sup>10–23</sup> The phylogenetic tree was generated using the One-click method from phylogeny.fr<sup>24</sup> with the sequences identified in Table S3 and the accession numbers listed in the tree. The bolded TTAs were characterized in this study.

#### IV. Supplementary References

1. Seiple, I. B., Mercer, J. A. M., Sussman, R. J., Zhang, Z. & Myers, A. G. Stereocontrolled Synthesis of syn- $\beta$ -Hydroxy- $\alpha$ -Amino Acids by Direct Aldolization of Pseudoephedrine Glycinamide. *Angewandte Chemie International Edition* **53**, 4642–4647 (2014).
2. Kunjapur, A. M., Tarasova, Y. & Prather, K. L. J. Synthesis and Accumulation of Aromatic Aldehydes in an Engineered Strain of *Escherichia coli*. *Journal of the American Chemical Society* **136**, 11644–11654 (2014).
3. Gopal, M. R. *et al.* Reductive Enzyme Cascades for Valorization of Polyethylene Terephthalate Deconstruction Products. *ACS Catal.* **13**, 4778–4789 (2023).
4. Yang, X. & van der Donk, W. A. Post-translational Introduction of D-Alanine into Ribosomally Synthesized Peptides by the Dehydroalanine Reductase NpnJ. *J Am Chem Soc* **137**, 12426–12429 (2015).
5. Xu, L., Wang, L. C., Su, B. M., Xu, X. Q. & Lin, J. Efficient biosynthesis of (2S, 3R)-4-methylsulfonylphenylserine by artificial self-assembly of enzyme complex combined with an intensified acetaldehyde elimination system. *Bioorganic Chemistry* **110**, (2021).
6. Johannes, T. W., Woodyer, R. D. & Zhao, H. Efficient regeneration of NADPH using an engineered phosphite dehydrogenase. *Biotechnol Bioeng* **96**, 18–26 (2007).
7. Kumar, P. *et al.* L-Threonine Transaldolase Activity Is Enabled by a Persistent Catalytic Intermediate. *ACS Chem. Biol.* **16**, 86–95 (2021).
8. Stothard, P. The sequence manipulation suite: JavaScript programs for analyzing and formatting protein and DNA sequences. *Biotechniques* **28**, 1102, 1104 (2000).
9. Mirdita, M. *et al.* ColabFold: making protein folding accessible to all. *Nat Methods* **19**, 679–682 (2022).
10. Scott, T. A., Heine, D., Qin, Z. & Wilkinson, B. An L-threonine transaldolase is required for L-threo- $\beta$ -hydroxy- $\alpha$ -amino acid assembly during obafluorin biosynthesis. *Nature Communications* **8**, 1–11 (2017).

11. Xiu, Y., Xu, G. & Ni, Y. Multi-enzyme cascade for sustainable synthesis of l-threo-phenylserine by modulating aldehydes inhibition and kinetic/thermodynamic controls. *Syst Microbiol and Biomanuf* (2022) doi:10.1007/s43393-022-00102-x.
12. Schaffer, J. E., Reck, M. R., Prasad, N. K. & Wencewicz, T. A.  $\beta$ -Lactone formation during product release from a nonribosomal peptide synthetase. *Nature Chemical Biology* **13**, 737–744 (2017).
13. Zelyas, N. J., Cai, H., Kwong, T. & Jensen, S. E. Alanylclavam Biosynthetic Genes Are Clustered Together with One Group of Clavulanic Acid Biosynthetic Genes in *Streptomyces clavuligerus*. *J Bacteriol* **190**, 7957–7965 (2008).
14. Goomeshi Nobary, S. & Jensen, S. E. A comparison of the clavam biosynthetic gene clusters in *Streptomyces antibioticus* Tü1718 and *Streptomyces clavuligerus*. *Can. J. Microbiol.* **58**, 413–425 (2012).
15. Ushimaru, R. & Liu, H. Biosynthetic Origin of the Atypical Stereochemistry in the Thioheptose Core of Albomycin Nucleoside Antibiotics. *J. Am. Chem. Soc.* **141**, 2211–2214 (2019).
16. Cheng, Y.-Q., Tang, G.-L. & Shen, B. Identification and localization of the gene cluster encoding biosynthesis of the antitumor macrolactam leinamycin in *Streptomyces atroolivaceus* S-140. *J Bacteriol* **184**, 7013–7024 (2002).
17. Funabashi, M. *et al.* Identification of the biosynthetic gene cluster of A-500359s in *Streptomyces griseus* SANK60196. *J Antibiot (Tokyo)* **62**, 325–332 (2009).
18. Wu, L. *et al.* An unusual metal-bound 4-fluorothreonine transaldolase from *Streptomyces* sp. MA37 catalyses promiscuous transaldol reactions. *Applied Microbiology and Biotechnology* **104**, 3885–3896 (2020).
19. Murphy, C. D., O’Hagan, D. & Schaffrath, C. Identification of a PLP-Dependent Threonine Transaldolase: A Novel Enzyme Involved in 4-Fluorothreonine Biosynthesis in *Streptomyces cattleya*. *Angew. Chem. Int. Ed* **40**, (2001).
20. Chi, X. *et al.* The muraminomicin biosynthetic gene cluster and enzymatic formation of the 2-deoxyaminoribosyl appendage. *Medchemcomm* **4**, 239–243 (2013).

21. Kaysser, L. *et al.* Identification and Manipulation of the Caprazamycin Gene Cluster Lead to New Simplified Liponucleoside Antibiotics and Give Insights into the Biosynthetic Pathway \*. *Journal of Biological Chemistry* **284**, 14987–14996 (2009).
22. Kaysser, L., Siebenberg, S., Kammerer, B. & Gust, B. Analysis of the liposidomycin gene cluster leads to the identification of new caprazamycin derivatives. *Chembiochem* **11**, 191–196 (2010).
23. Barnard-Britson, S. *et al.* Amalgamation of nucleosides and amino acids in antibiotic biosynthesis: Discovery of an l -threonine: Uridine-5'-aldehyde transaldolase. *Journal of the American Chemical Society* **134**, 18514–18517 (2012).
24. Dereeper, A. *et al.* Phylogeny.fr: robust phylogenetic analysis for the non-specialist. *Nucleic Acids Res* **36**, W465-469 (2008).
