# Supplementary material for: Discovery of l-threonine transaldolases for enhanced biosynthesis of beta-hydroxylated amino acids
Source: PubMed Central journal article supplement (PMC10495429; doi:10.1038/s42003-023-05293-0), 2023-09-11
Supplement: 42003_2023_5293_MOESM3_ESM.pdf [file 42003_2023_5293_MOESM3_ESM.pdf]

## **Description of Additional Supplementary Files**

**File name:** Supplementary Data 1

**Description:** The source data for the figures in the paper.
